# Supplementary material for: Genome-Wide Identification and Analysis of Collar Region-Preferential Genes in Rice
Source: MDPI journal article supplement (doi:10.3390/plants12162959), 2023-08-16
Supplement: s1 [file s1]

**Figure S1.** Venn diagram of functionally characterized CRPGs.

**Figure S2.** KEGG enrichment analysis for 657 CRPGs.

**Figure S3.** MapMan analysis for 657 CRPGs. Results of mapping 657 CRPGs to (a) metabolism overview and (b) regulation overview.
