# Supplementary material for: Genome-Wide Identification and Analysis of Collar Region-Preferential Genes in Rice
Source: Plants (Basel). 2023 Aug 16;12(16):2959. doi: 10.3390/plants12162959 (PMC10458737; doi:10.3390/plants12162959)
Supplement: Supplementary file 1 [file plants-12-02959-s001.zip]

Archive with 5 entries (5 files):
- Figure S1.jpg
- Figure S2.jpg
- Figure S3.jpg
- Supplemental Tables.xlsx
- Supplementary figure caption.pdf
