# Supplementary material for: Genome-Wide Identification and Analysis of Collar Region-Preferential Genes in Rice
Source: Plants (Basel). 2023 Aug 16;12(16):2959. doi: 10.3390/plants12162959 (PMC10458737; doi:10.3390/plants12162959)
Supplement: Supplementary file 1 [file plants-12-02959-s001.zip › Supplemental Tables.xlsx]

## Sheet: Table S1
Table S1. Detailed information of 657 collar region-perferential genes.			Log2 intensity value
Name	Locus_id	Putative function	Collar Region	Leaf Region	Shoot	Root	Anther	Pollen	Seed	Callus
CRPG1	LOC_Os06g21240	glycine rich protein family protein, putative, expressed	13.9808	9.19483	10.3726	0.816305	5.18023	0	9.67914	1.13979
CRPG2	LOC_Os10g02880	O-methyltransferase, putative, expressed	12.6123	7.33347	5.44886	1.43373	5.55972	0	1.5606	1.7716
CRPG3	LOC_Os12g37320	lipoxygenase 2.2, chloroplast precursor, putative, expressed	12.4266	3.94051	1.00679	0	0	2.59835	0.40523	0
CRPG4	LOC_Os02g48770	SAM dependent carboxyl methyltransferase, putative, expressed	11.9663	5.89761	7.07586	0.964334	3.98241	0	4.12906	0.914214
CRPG5	LOC_Os12g02980	nucleoside-triphosphatase, putative, expressed	11.8694	8.85191	8.14554	0.353668	2.16118	2.38494	5.1467	1.08783
CRPG6	LOC_Os11g40340	expressed protein	10.964	3.24584	4.88866	1.87311	5.1794	0	3.38337	0
CRPG7	LOC_Os02g41954	gibberellin 2-beta-dioxygenase 7, putative, expressed	10.9196	6.4696	4.25392	3.35111	1.99247	4.96976	4.15672	7.87937
CRPG8	LOC_Os09g08990	cytochrome P450, putative, expressed	10.8871	4.33092	6.9354	0.568601	0.890214	3.09671	0	1.19339
CRPG9	LOC_Os08g28790	dirigent, putative, expressed	10.8066	6.52904	8.63921	4.79387	2.39272	0	4.18672	0.489794
CRPG10	LOC_Os12g16240	nmrA-like family domain containing protein, expressed	10.6667	8.71516	6.38605	5.2755	6.99781	0	3.58751	0.971291
CRPG11	LOC_Os09g08720	cinnamoyl CoA reductase, putative, expressed	10.6589	4.39683	5.85464	0	0	0	0	0
CRPG12	LOC_Os01g18120	cinnamoyl CoA reductase, putative, expressed	10.6421	6.63737	2.56656	0	8.92692	0	2.16307	0.489794
CRPG13	LOC_Os12g37510	UDP-glucoronosyl and UDP-glucosyl transferase domain containing protein, expressed	10.5292	4.8235	9.98504	0.975388	0	0	2.65026	1.6258
CRPG14	LOC_Os06g13460	SAM dependent carboxyl methyltransferase family protein, putative, expressed	10.4809	3.65514	1.79045	0.558235	6.39321	0	0.40523	0
CRPG15	LOC_Os04g01810	terpene synthase, putative, expressed	10.4628	4.02238	1.27125	0	2.41176	0	0	0
CRPG16	LOC_Os02g43330	homeobox associated leucine zipper, putative, expressed	10.3749	6.74191	5.86105	0	3.13558	0	5.69042	8.93335
CRPG17	LOC_Os06g45890	MYB family transcription factor, putative, expressed	10.2457	7.1425	7.55463	3.2581	3.30052	0	4.11869	7.57704
CRPG18	LOC_Os10g25400	GDSL-like lipase/acylhydrolase, putative, expressed	10.2152	4.92986	5.74963	3.13214	7.28212	6.84285	3.35224	0.565887
CRPG19	LOC_Os04g49210	naringenin,2-oxoglutarate 3-dioxygenase, putative, expressed	10.0408	6.6714	7.51911	2.60371	3.3628	0	6.9213	2.78007
CRPG20	LOC_Os02g02930	terpene synthase, putative, expressed	9.99392	4.50822	4.50819	0.568601	4.53318	4.54447	0	0.565887
CRPG21	LOC_Os09g07440	retrotransposon protein, putative, unclassified, expressed	9.77561	4.57526	8.51269	7.40948	1.43664	0	0.817591	0.565887
CRPG22	LOC_Os10g39840	glycosyl hydrolases family 16, putative, expressed	9.77366	4.88272	8.84731	3.17305	0.877861	2.25621	4.30227	1.33901
CRPG23	LOC_Os04g09720	OsSCP22 - Putative Serine Carboxypeptidase homologue, expressed	9.76273	4.43658	4.04777	3.33132	6.07575	0	5.65868	5.34917
CRPG24	LOC_Os03g18030	leucoanthocyanidin dioxygenase, putative, expressed	9.73777	6.16405	6.30319	3.05037	3.88182	2.38494	4.33966	5.73731
CRPG25	LOC_Os07g46920	sex determination protein tasselseed-2, putative, expressed	9.62786	4.70509	5.75916	4.01044	1.67343	3.36165	4.08682	1.08783
CRPG26	LOC_Os10g37160	transposon protein, putative, unclassified, expressed	9.58949	2.3264	2.59565	0	1.41387	0	1.54448	1.83373
CRPG27	LOC_Os10g02840	O-methyltransferase, putative, expressed	9.57204	5.58024	3.64496	4.52787	0.493675	0	3.97672	1.42821
CRPG28	LOC_Os11g45540	TKL_IRAK_DUF26-lh.11 - DUF26 kinases have homology to DUF26 containing loci, expressed	9.54217	5.72198	5.99793	2.73645	1.44239	0	2.63746	1.93231
CRPG29	LOC_Os04g40410	high affinity nitrate transporter, putative, expressed	9.52248	7.08843	4.5385	3.98497	0	3.29767	5.51117	6.78239
CRPG30	LOC_Os10g36110	LTPL158 - Protease inhibitor/seed storage/LTP family protein precursor, expressed	9.28508	3.77015	0	0	0	0	0.897632	4.14539
CRPG31	LOC_Os03g05880	monooxygenase, putative, expressed	9.26155	7.37278	5.16647	0.558235	0.898594	2.38494	3.70243	2.65485
CRPG32	LOC_Os11g02520	WRKY104, expressed	9.18987	4.53677	3.82359	0	0	0	0	0
CRPG33	LOC_Os09g16030	cytokinin-O-glucosyltransferase 1, putative, expressed	9.18453	1.9676	1.00679	1.74182	0	0	1.66608	0.85327
CRPG34	LOC_Os04g44150	gibberellin 2-beta-dioxygenase 7, putative, expressed	9.15678	5.11929	1.68615	0.637481	3.98483	3.8962	4.99176	5.25078
CRPG35	LOC_Os07g05940	9-cis-epoxycarotenoid dioxygenase 1, chloroplast precursor, putative, expressed	9.14954	4.31939	5.29823	4.81687	3.95608	0	4.27935	3.80072
CRPG36	LOC_Os12g01490	MYB family transcription factor, putative, expressed	9.04159	7.72447	5.95404	2.59043	4.12638	6.70983	6.0889	3.21492
CRPG37	LOC_Os11g03230	nucleoside-triphosphatase, putative, expressed	8.99347	5.51563	5.15518	0.964334	0	0	2.51612	0
CRPG38	LOC_Os08g07080	terpene synthase, putative, expressed	8.97793	6.95286	8.15941	2.00803	1.18414	0	0.779358	0
CRPG39	LOC_Os04g52310	metal cation transporter, putative, expressed	8.95258	5.40644	5.77356	2.3364	4.57558	0	4.70569	3.2241
CRPG40	LOC_Os01g02830	receptor-like kinase ARK1AS, putative, expressed	8.93215	7.08834	4.99824	1.67108	6.11376	6.64957	4.68931	1.90401
CRPG41	LOC_Os03g12500	cytochrome P450, putative, expressed	8.931	3.81509	6.99998	4.79174	1.1602	0	2.99477	3.09701
CRPG42	LOC_Os12g16250	nmrA-like family domain containing protein, expressed	8.9183	7.4409	5.84662	5.44834	5.87736	0	3.1541	0
CRPG43	LOC_Os02g45420	AP2 domain containing protein, expressed	8.88289	3.37596	2.22473	3.9013	2.68664	0	3.70973	1.66179
CRPG44	LOC_Os06g30370	osMFT1 MFT-Like1 homologous to Mother of FT and TFL1 gene; contains Pfam profile PF01161: Phosphatidylethanolamine-binding protein, expressed	8.82793	7.02145	5.27266	2.65205	1.67343	0	11.4612	3.28495
CRPG45	LOC_Os11g29840	expressed protein	8.76189	2.91416	8.16708	2.03755	0.890214	3.67558	0.721241	4.62635
CRPG46	LOC_Os12g30824	terpene synthase, putative, expressed	8.69906	5.28382	4.60262	1.28348	2.89246	0	6.55123	0
CRPG47	LOC_Os02g37770	lecithin cholesterol acyltransferase, putative, expressed	8.68913	6.37445	7.71878	0	1.8212	0	1.5606	0
CRPG48	LOC_Os07g01600	dirigent, putative, expressed	8.68171	3.95709	8.26773	4.83733	4.3979	0	2.99829	5.42603
CRPG49	LOC_Os01g55160	expressed protein	8.67339	3.75974	5.4487	4.0053	3.30756	3.47403	6.6649	4.20347
CRPG50	LOC_Os05g49700	AP2 domain containing protein, expressed	8.66824	6.70773	5.56759	2.2868	2.87164	2.25621	2.13175	0.399383
CRPG51	LOC_Os10g35830	expressed protein	8.65115	5.15109	1.40839	5.09054	0	0	3.24589	2.82496
CRPG52	LOC_Os01g26280	OsWAK8 - OsWAK receptor-like protein kinase, expressed	8.63616	7.34849	6.71736	4.58515	0.531493	0	0.524226	0
CRPG53	LOC_Os01g05780	expressed protein	8.61874	6.67064	6.33848	0	1.45644	2.38494	2.7476	0.489794
CRPG54	LOC_Os06g03670	dehydration-responsive element-binding protein, putative, expressed	8.61789	2.22262	4.15972	4.10901	5.43255	2.59835	4.20648	1.42923
CRPG55	LOC_Os11g45990	von Willebrand factor type A domain containing protein, putative, expressed	8.61372	6.65382	6.9942	5.10281	0	0	5.33994	2.45906
CRPG56	LOC_Os01g72910	abscisic stress-ripening, putative, expressed	8.60624	4.23262	5.19534	2.90066	2.14392	3.47403	4.09515	3.4546
CRPG57	LOC_Os05g25920	expressed protein	8.56022	6.11219	4.50334	4.86472	4.24297	0	4.81851	5.99289
CRPG58	LOC_Os01g72900	abscisic stress-ripening, putative, expressed	8.54621	4.79576	4.91801	1.82776	2.48704	2.59835	4.78855	4.35196
CRPG59	LOC_Os06g01960	retrotransposon protein, putative, unclassified, expressed	8.53572	4.69643	7.29646	4.35438	5.53045	0	2.72002	6.04066
CRPG60	LOC_Os12g03730	zinc finger DHHC domain-containing protein, putative, expressed	8.53426	5.54829	3.87183	5.27011	5.93311	3.17002	5.31181	4.72987
CRPG61	LOC_Os01g66530	ARGOS, putative, expressed	8.52534	5.45334	4.11366	6.20466	6.04896	0	2.46101	3.6518
CRPG62	LOC_Os04g56170	OsSPL8 - SBP-box gene family member, expressed	8.52411	7.22771	7.46475	0.964334	0	2.38494	3.93617	0.399383
CRPG63	LOC_Os06g30640	cytochrome P450, putative, expressed	8.51934	6.43179	5.17009	3.13464	5.12131	2.25621	3.98324	7.64365
CRPG64	LOC_Os03g01870	no apical meristem protein, putative, expressed	8.51076	4.93211	4.10343	2.54526	0	0	1.02904	2.50266
CRPG65	LOC_Os01g05870	receptor kinase, putative, expressed	8.50306	7.39577	4.74013	5.31359	2.70808	4.84695	5.05197	3.52509
CRPG66	LOC_Os02g50900	expressed protein	8.48008	3.00345	6.02358	0.568601	3.13735	0	1.7604	1.73191
CRPG67	LOC_Os08g07490	expressed protein	8.46119	7.39638	6.72249	5.09738	6.6091	0	3.07901	0
CRPG68	LOC_Os01g19170	polygalacturonase, putative, expressed	8.45996	7.24302	6.48095	5.91797	0.531493	0	2.9864	1.54926
CRPG69	LOC_Os01g65700	expressed protein	8.42178	6.56131	5.97501	2.98416	1.20769	0	5.65567	4.76975
CRPG70	LOC_Os10g04400	transferase family protein, putative, expressed	8.41933	1.45101	1.19703	1.15638	0	0	0	0
CRPG71	LOC_Os01g34560	3-ketoacyl-CoA synthase, putative, expressed	8.41731	6.75125	9.15576	1.97629	8.32171	0	5.82471	2.43946
CRPG72	LOC_Os06g04900	transporter family protein, putative, expressed	8.37754	6.21909	4.75471	4.04016	2.62384	5.73406	4.03563	1.51032
CRPG73	LOC_Os10g18260	TKL_IRAK_DUF26-lc.27 - DUF26 kinases have homology to DUF26 containing loci, expressed	8.36994	3.87266	2.48591	0.816305	0	0	4.25646	0.854785
CRPG74	LOC_Os01g14630	polyprenyl synthetase, putative, expressed	8.34567	5.01736	4.58047	3.84176	0.493675	0	3.13843	0.85327
CRPG75	LOC_Os06g46740	early nodulin 20 precursor, putative, expressed	8.28947	4.02622	7.79245	0	0.890214	0	6.13439	7.34774
CRPG76	LOC_Os04g59420	expressed protein	8.28133	2.86999	7.4364	0.964334	6.39375	0	3.52169	4.54754
CRPG77	LOC_Os09g16449	pleiotropic drug resistance protein 4, putative, expressed	8.21772	5.62027	4.35474	0.964334	1.4224	0	3.43138	0
CRPG78	LOC_Os04g39864	Os4bglu11 - beta-glucosidase homologue, similar to Os4Bglu12 exoglucanase/beta-glucosidase, expressed	8.19959	4.91094	6.78605	3.83418	3.03076	0	3.58297	0.399383
CRPG79	LOC_Os01g72740	cytochrome P450, putative, expressed	8.15173	3.61929	4.05821	7.0485	6.17933	0	0	2.30356
CRPG80	LOC_Os02g17000	OsSub14 - Putative Subtilisin homologue, expressed	8.151	1.38124	3.76909	2.91548	1.4224	0	4.07508	1.42427
CRPG81	LOC_Os02g37200	hydrophobin, putative, expressed	8.14823	6.44338	6.22486	0	0	0	1.64066	0
CRPG82	LOC_Os06g02780	aspartic protease, putative, expressed	8.13947	5.80841	11.2251	0.353668	3.31529	0	7.36658	1.19339
CRPG83	LOC_Os07g23660	retrotransposon protein, putative, unclassified, expressed	8.13466	2.75953	6.39293	0.637481	4.34667	0	3.80893	5.33459
CRPG84	LOC_Os07g10190	glucosyltransferase, putative, expressed	8.11987	5.619	6.63258	5.29482	3.12682	3.85822	1.61524	1.92675
CRPG85	LOC_Os01g20206	methyltransferase, putative, expressed	8.11523	5.53752	5.74109	3.51325	6.01675	3.8962	2.78051	3.47279
CRPG86	LOC_Os01g42190	heat shock protein DnaJ, putative, expressed	8.078	5.63922	5.93345	0.558235	7.50622	3.93877	7.24023	4.38573
CRPG87	LOC_Os03g44710	YABBY domain containing protein, putative, expressed	8.03901	7.62988	8.6452	0	3.63996	0	8.81703	4.30047
CRPG88	LOC_Os11g29920	NB-ARC domain containing protein, expressed	8.03484	4.43774	1.65053	2.86223	0.531493	0	2.8089	6.57544
CRPG89	LOC_Os07g25540	flavin monooxygenase, putative, expressed	8.00906	5.68184	6.83636	6.26812	2.10849	4.43765	1.42934	5.86327
CRPG90	LOC_Os08g34510	expressed protein	8.00101	1.76563	4.06929	4.42675	1.20093	2.59835	3.1718	6.27004
CRPG91	LOC_Os08g10130	expressed protein	7.98161	4.72767	5.81334	4.11661	1.19098	0	2.72648	2.30196
CRPG92	LOC_Os02g57770	glycosyl hydrolases family 16, putative, expressed	7.97713	1.28228	6.28425	1.90478	1.66135	4.64392	1.46312	0
CRPG93	LOC_Os12g05690	expressed protein	7.97672	4.23456	3.39637	2.42751	0	0	1.33624	0
CRPG94	LOC_Os02g32850	expressed protein	7.95148	1.17399	2.55707	0.353668	0	0	1.13791	0.489794
CRPG95	LOC_Os05g47750	Ser/Thr protein kinase, putative, expressed	7.93865	6.24018	4.60028	6.23003	0.86936	0	4.04375	6.69976
CRPG96	LOC_Os06g20820	expressed protein	7.9274	5.30717	3.96884	5.42885	1.18414	0	3.45542	1.38279
CRPG97	LOC_Os10g09240	expressed protein	7.86764	6.10153	6.11811	0.816305	2.16973	0	4.07617	5.03235
CRPG98	LOC_Os01g49320	glycosyl hydrolase, putative, expressed	7.8309	6.21695	6.81843	4.80998	1.16715	0	5.00536	6.87285
CRPG99	LOC_Os10g38940	fatty acid hydroxylase, putative, expressed	7.80368	5.75721	9.39135	3.69089	7.37546	5.18556	4.50509	2.12801
CRPG100	LOC_Os01g09660	expressed protein	7.80168	5.01873	5.54183	5.58208	2.1281	3.72506	3.81402	3.47519
CRPG101	LOC_Os07g02624	expressed protein	7.7759	5.61795	3.69907	3.76468	0	0	3.33138	1.58627
CRPG102	LOC_Os04g32480	zinc-finger protein, putative, expressed	7.75072	3.58329	3.3099	0.816305	2.78993	0	1.84518	0.785081
CRPG103	LOC_Os01g41420	transmembrane amino acid transporter protein, putative, expressed	7.71469	2.96215	3.03296	4.05782	5.25752	0	2.81816	1.69932
CRPG104	LOC_Os03g16500	aspartic proteinase nepenthesin precursor, putative, expressed	7.70002	2.66686	5.76886	4.31081	2.51961	0	2.29656	3.75073
CRPG105	LOC_Os11g10470	expressed protein	7.68925	6.15609	5.41888	4.88066	4.1556	0	4.43629	5.55812
CRPG106	LOC_Os10g38160	glutathione S-transferase, putative, expressed	7.67919	3.78562	6.23812	2.11094	2.9558	0	4.30734	0
CRPG107	LOC_Os03g06900	DNA topoisomerase 3 protein, putative, expressed	7.67316	5.20109	5.30706	5.4744	4.64032	3.47403	4.72024	5.22798
CRPG108	LOC_Os09g31446	expressed protein	7.61389	5.78845	4.41018	3.11086	3.82729	0	5.4507	7.207
CRPG109	LOC_Os01g11660	GDSL-like lipase/acylhydrolase, putative, expressed	7.60006	4.11236	4.88855	4.5595	0.493675	4.74018	1.36702	1.83822
CRPG110	LOC_Os02g56860	3-ketoacyl-CoA synthase, putative, expressed	7.59692	3.73444	6.31236	0.568601	5.84792	4.22238	4.76495	3.34515
CRPG111	LOC_Os07g02850	DUF538 domain containing protein, putative, expressed	7.57762	2.84862	2.24946	0.967576	1.62683	0	2.04999	4.52923
CRPG112	LOC_Os11g40009	phospholipase, patatin family, putative, expressed	7.55042	4.89435	8.85448	0.353668	3.77745	4.12491	2.36054	3.51532
CRPG113	LOC_Os01g05760	PAS2, putative, expressed	7.54822	5.62954	5.73083	0	0.493675	0	1.42934	0
CRPG114	LOC_Os01g43650	WRKY11, expressed	7.54358	5.77257	5.27588	4.35309	1.66627	4.76406	4.64636	7.19056
CRPG115	LOC_Os07g48710	VQ domain containing protein, putative, expressed	7.53578	5.28491	4.37989	6.50432	3.55479	0	4.01356	4.70599
CRPG116	LOC_Os10g42130	no apical meristem protein, putative, expressed	7.53079	4.58333	5.16828	4.49942	4.71577	0	1.80809	2.92589
CRPG117	LOC_Os01g03130	expressed protein	7.53008	4.16239	4.76972	6.26481	3.12242	4.90966	3.95195	3.80991
CRPG118	LOC_Os02g16940	OsSub13 - Putative Subtilisin homologue, expressed	7.52628	3.46003	5.01987	2.31117	0	0	6.0462	3.23836
CRPG119	LOC_Os08g09950	acyl-desaturase, chloroplast precursor, putative, expressed	7.52299	3.65057	3.68126	0	1.84509	4.40761	3.11125	0
CRPG120	LOC_Os11g44860	cysteine-rich receptor-like protein kinase 28 precursor, putative, expressed	7.48628	6.18496	2.46474	4.47294	0	4.01506	4.3928	4.54982
CRPG121	LOC_Os02g18540	uncharacterized Cys-rich domain containing protein, putative, expressed	7.48498	5.90621	6.19908	6.2987	0.504696	0	0	0.489794
CRPG122	LOC_Os03g60220	DUF567 domain containing protein, putative, expressed	7.4819	5.5658	4.42149	5.97117	2.6137	3.76666	3.63412	5.7407
CRPG123	LOC_Os05g38940	expressed protein	7.47221	2.60139	2.2612	2.65612	4.5835	4.78135	1.33624	5.80001
CRPG124	LOC_Os06g05420	expressed protein	7.4624	4.54076	4.65858	2.37139	3.76074	4.71591	1.42934	8.23005
CRPG125	LOC_Os11g34624	TKL_IRAK_DUF26-lc.29 - DUF26 kinases have homology to DUF26 containing loci, expressed	7.4566	5.26304	1.0909	0	0.504696	0	2.97474	5.58534
CRPG126	LOC_Os06g12090	miro, putative, expressed	7.45262	4.57693	3.74361	2.31245	2.38241	0	3.25329	3.73975
CRPG127	LOC_Os07g15940	legume lectins beta domain containing protein, expressed	7.41436	6.38804	5.28497	4.40347	0.504696	0	4.58017	1.03008
CRPG128	LOC_Os01g05770	expressed protein	7.39357	5.84672	6.46739	0.964334	2.69147	3.77291	2.37603	1.19339
CRPG129	LOC_Os02g08270	class I glutamine amidotransferase, putative, expressed	7.38148	4.1851	4.1268	6.91923	4.81821	2.25621	0.779358	3.64135
CRPG130	LOC_Os05g24520	retrotransposon protein, putative, Ty3-gypsy subclass, expressed	7.37231	5.77253	4.03058	0	0	0	1.42721	0
CRPG131	LOC_Os04g53050	disease resistance RPP13-like protein 1, putative, expressed	7.35722	5.21852	3.90825	4.94149	7.46012	2.25621	4.60822	3.66429
CRPG132	LOC_Os01g10640	expressed protein	7.35085	5.45703	4.17563	3.43775	0	0	1.69063	2.65061
CRPG133	LOC_Os01g50720	MYB family transcription factor, putative, expressed	7.34001	5.45806	8.07292	6.66815	0.919033	0	3.29439	0.399383
CRPG134	LOC_Os02g41460	DUF640 domain containing protein, putative, expressed	7.33873	3.78909	6.22391	5.77783	0.504696	0	1.39257	5.36949
CRPG135	LOC_Os10g38820	bZIP family transcription factor, putative, expressed	7.32897	2.53717	4.58848	5.43679	4.38361	2.38494	3.53377	3.89651
CRPG136	LOC_Os04g20330	UDP-glucoronosyl/UDP-glucosyl transferase, putative, expressed	7.32629	4.58021	6.37616	5.26493	1.64917	2.59835	2.33087	1.89401
CRPG137	LOC_Os04g55100	expressed protein	7.31658	0.61876	4.74449	1.58008	0	0	2.68754	2.72653
CRPG138	LOC_Os01g43750	cytochrome P450 72A1, putative, expressed	7.29826	5.30897	4.37429	4.96424	2.16466	0	4.85408	6.69379
CRPG139	LOC_Os02g30380	expressed protein	7.29532	2.69268	6.18223	4.14488	3.47358	0	4.37045	4.04362
CRPG140	LOC_Os06g25010	glycosyl hydrolase, putative, expressed	7.29156	3.44772	4.78857	4.77338	4.39282	0	0.40523	5.00629
CRPG141	LOC_Os11g28910	transposon protein, putative, CACTA, En/Spm sub-class, expressed	7.29072	5.27642	4.20171	0.353668	1.40801	0	5.53445	6.19626
CRPG142	LOC_Os02g35970	BTBN2 - Bric-a-Brac, Tramtrack, Broad Complex BTB domain with non-phototropic hypocotyl 3 NPH3 and coiled-coil domains, expressed	7.28974	4.56154	5.91323	2.23325	4.03001	0	2.42099	5.25375
CRPG143	LOC_Os11g26760	dehydrin, putative, expressed	7.26307	3.61143	6.25043	1.15921	0	0	6.45088	5.2206
CRPG144	LOC_Os04g39360	heavy metal transport/detoxification protein, putative, expressed	7.25668	3.57313	4.84693	3.68534	1.40801	0	0.907908	0.399383
CRPG145	LOC_Os11g02750	DUF567 domain containing protein, putative, expressed	7.24974	5.87521	5.06242	4.21343	5.8025	0	4.28497	3.66115
CRPG146	LOC_Os05g43930	O-methyltransferase, putative, expressed	7.24193	5.01048	5.9732	0.975388	1.66627	0	6.813	1.90044
CRPG147	LOC_Os01g05480	expressed protein	7.19341	4.55622	6.26108	1.70356	2.87574	2.38494	4.49738	2.84593
CRPG148	LOC_Os02g37780	lecithine cholesterol acyltransferase, putative, expressed	7.1663	4.93401	5.9542	0	0.493675	0	0.524226	0
CRPG149	LOC_Os07g25050	thionin-like peptide, putative, expressed	7.16526	0.603865	0.403249	4.72138	0.531493	0	0	0.847389
CRPG150	LOC_Os03g57520	VQ domain containing protein, putative, expressed	7.16278	5.35581	2.54742	4.46919	1.82999	0	0.721241	0.399383
CRPG151	LOC_Os10g07010	3-ketoacyl-CoA synthase, putative, expressed	7.15663	4.2717	5.00741	6.46534	8.82806	2.25621	0.983216	1.55195
CRPG152	LOC_Os07g02660	expressed protein	7.15195	4.76427	3.28021	3.0926	2.36016	0	3.36109	3.94127
CRPG153	LOC_Os02g45450	dehydration-responsive element-binding protein, putative, expressed	7.11843	3.70139	2.92993	3.97501	5.04623	0	2.84046	1.7351
CRPG154	LOC_Os08g34050	phosphofructokinase, putative, expressed	7.11577	5.10617	5.44882	6.33056	3.86455	2.25621	2.96904	3.81561
CRPG155	LOC_Os06g08190	expressed protein	7.10326	1.76527	0.718058	4.84023	0	0	0.524226	0.489794
CRPG156	LOC_Os04g20400	cytokinin-O-glucosyltransferase 1, putative, expressed	7.0968	4.66854	5.63609	0.816305	1.63186	0	3.18261	1.19339
CRPG157	LOC_Os07g29460	retrotransposon protein, putative, Ty1-copia subclass, expressed	7.0885	5.81443	4.20141	3.52183	5.39635	4.61799	5.48575	4.2541
CRPG158	LOC_Os10g18700	expressed protein	7.08284	5.86774	5.99473	4.2405	5.6829	4.78445	4.53314	1.83448
CRPG159	LOC_Os02g30150	disease resistance protein, putative, expressed	7.07812	5.97518	5.44758	3.83552	4.2649	2.25621	4.68735	5.08548
CRPG160	LOC_Os03g41480	expressed protein	7.03908	3.10143	0.976326	0	1.86629	0	0.621718	3.21322
CRPG161	LOC_Os02g33670	expressed protein	7.0168	2.75531	3.95721	4.11248	2.51961	0	2.35555	5.50961
CRPG162	LOC_Os10g04380	expressed protein	6.98627	0.373786	0	0	0	0	0	0
CRPG163	LOC_Os02g37300	heavy metal associated domain containing protein, expressed	6.97586	5.74321	6.88376	5.20462	5.72603	0	4.61588	2.90678
CRPG164	LOC_Os01g56240	OsSAUR2 - Auxin-responsive SAUR gene family member, expressed	6.97546	3.79083	1.77532	1.57193	1.43664	0	2.26673	2.04876
CRPG165	LOC_Os08g04560	decarboxylase, putative, expressed	6.94866	5.33911	4.53373	2.69841	6.62203	0	3.9345	1.46745
CRPG166	LOC_Os06g43080	expressed protein	6.94611	2.67538	3.12316	1.32836	0	0	3.12216	3.67942
CRPG167	LOC_Os10g39700	CHIT15 - Chitinase family protein precursor, putative, expressed	6.94474	5.10569	0.885043	1.66909	1.20093	0	2.50445	3.68899
CRPG168	LOC_Os01g56235	expressed protein	6.92956	2.8362	3.10896	2.88447	1.65412	0	1.84734	1.38686
CRPG169	LOC_Os02g34760	retrotransposon protein, putative, unclassified, expressed	6.90881	6.06857	2.55707	3.73346	4.7185	4.08756	5.69724	5.99869
CRPG170	LOC_Os10g23310	transferase family protein, putative, expressed	6.90725	1.30605	4.31372	1.28348	0	0	0	1.6258
CRPG171	LOC_Os07g44910	gibberellin receptor GID1L2, putative, expressed	6.90539	4.32404	5.69233	5.77426	5.26564	0	2.39217	6.55967
CRPG172	LOC_Os09g30490	EF hand family protein, expressed	6.89949	5.19772	5.71775	2.03381	6.1008	3.29767	5.66302	6.07277
CRPG173	LOC_Os12g03050	no apical meristem protein, putative, expressed	6.88036	3.57907	4.9967	4.50415	2.87786	5.04191	4.24265	5.67227
CRPG174	LOC_Os09g16050	ankyrin repeat family protein, putative, expressed	6.87952	0.374407	1.93497	2.16684	0	0	0.524226	0
CRPG175	LOC_Os09g16458	pleiotropic drug resistance protein 4, putative, expressed	6.86263	4.34207	4.01238	0	0	0	2.97058	0.565887
CRPG176	LOC_Os07g35280	TKL_IRAK_DUF26-lc.1 - DUF26 kinases have homology to DUF26 containing loci, expressed	6.8307	5.1417	5.84996	5.42624	2.69259	3.47403	3.34264	3.80611
CRPG177	LOC_Os02g51950	expressed protein	6.82083	4.13782	7.26655	3.19107	1.65642	0	4.21651	6.81801
CRPG178	LOC_Os08g39240	OsWAK76 - OsWAK receptor-like cytoplasmic kinase OsWAK-RLCK, expressed	6.80012	5.74742	5.33062	3.8159	0.86936	0	0	0.565887
CRPG179	LOC_Os07g40810	NBS-LRR type disease resistance protein, putative, expressed	6.7848	4.81672	4.59097	4.84575	3.36129	3.67558	4.40124	5.64419
CRPG180	LOC_Os09g33580	BEE 1, putative, expressed	6.7116	2.88305	6.84315	1.48521	2.60879	0	3.95067	0.489794
CRPG181	LOC_Os05g02760	expressed protein	6.70559	2.18734	3.30996	5.84876	4.1237	2.59835	5.26553	3.19841
CRPG182	LOC_Os08g37130	oxidoreductase, short chain dehydrogenase/reductase family domain containing protein, expressed	6.68886	5.56853	7.56947	3.81507	3.95167	5.02484	3.82218	4.48451
CRPG183	LOC_Os01g61310	DUF640 domain containing protein, putative, expressed	6.68651	4.40403	3.33944	3.17375	1.67343	0	3.04998	0
CRPG184	LOC_Os04g47170	ATROPGEF7/ROPGEF7, putative, expressed	6.6823	3.55411	5.31016	4.88676	2.6998	3.93877	3.4992	5.31677
CRPG185	LOC_Os07g12720	expressed protein	6.66453	4.86289	5.09675	4.3387	2.00597	2.38494	4.59693	0.565887
CRPG186	LOC_Os08g35310	O-methyltransferase, putative, expressed	6.65813	3.34594	1.03469	0	2.87574	0	0	0
CRPG187	LOC_Os05g01140	methyltransferase, putative, expressed	6.65571	4.67162	8.82836	2.3186	0.504696	0	1.20237	4.02976
CRPG188	LOC_Os07g40830	app1, putative, expressed	6.6554	1.74139	2.05178	4.59972	1.4621	0	1.84893	0.565887
CRPG189	LOC_Os04g49250	UDP-glucose/GDP-mannose dehydrogenase family, central domain containing protein, expressed	6.61814	3.08604	3.43386	4.99814	3.495	4.19217	2.37713	3.36735
CRPG190	LOC_Os01g65150	proton-dependent oligopeptide transport, putative, expressed	6.61516	3.70329	4.01286	3.79185	2.15257	0	4.08014	0.399383
CRPG191	LOC_Os04g25060	cysteine-rich receptor-like protein kinase, putative, expressed	6.60975	3.01834	4.77161	3.39798	4.0253	2.38494	2.4037	1.7669
CRPG192	LOC_Os05g50700	WRKY111, expressed	6.59696	3.86285	4.25389	2.49473	2.96964	2.59835	3.02735	1.38686
CRPG193	LOC_Os08g36740	bHelix-loop-helix transcription factor, putative, expressed	6.59418	3.0058	1.1953	0	1.18414	0	0	0
CRPG194	LOC_Os02g37290	heavy metal associated domain containing protein, expressed	6.59218	5.29828	6.13243	5.46368	3.58427	0	3.28504	2.92625
CRPG195	LOC_Os04g18380	cytochrome P450, putative, expressed	6.58514	4.88577	4.13995	4.39893	1.19098	0	2.05325	3.35562
CRPG196	LOC_Os07g15930	legume lectins beta domain containing protein, expressed	6.56537	4.93797	1.00679	0	0	0	0.40523	0
CRPG197	LOC_Os05g31890	aspartyl protease family protein, putative, expressed	6.56181	1.21223	5.96552	0.568601	0	4.43765	0	1.33901
CRPG198	LOC_Os04g38885	expressed protein	6.55222	5.18474	4.42382	4.85213	4.56817	0	4.86899	1.86784
CRPG199	LOC_Os09g34160	resistance protein, putative, expressed	6.54607	3.25073	4.91249	3.35646	0.877861	0	1.98465	4.14765
CRPG200	LOC_Os11g05770	DUF623 domain containing protein, expressed	6.52663	4.5554	5.82761	6.24722	1.43664	0	3.185	5.23147
CRPG201	LOC_Os03g07540	bHLH family protein, putative, expressed	6.52393	0.717719	3.98374	2.19804	0.890214	0	1.12915	5.92754
CRPG202	LOC_Os03g21820	expansin precursor, putative, expressed	6.52219	1.29926	5.84779	3.4387	5.78719	0	5.44723	3.83318
CRPG203	LOC_Os04g09620	expressed protein	6.51087	3.47827	3.54304	0.967576	5.21215	3.09671	2.57374	0
CRPG204	LOC_Os07g35500	mucin-associated surface protein, putative, expressed	6.50324	3.30354	1.55466	4.30398	0.531493	0	0.40523	4.47911
CRPG205	LOC_Os04g58090	harpin-induced protein 1 domain containing protein, expressed	6.49039	4.68272	5.02886	5.89202	2.00984	2.59835	4.80048	4.31746
CRPG206	LOC_Os03g24650	terpene synthase family, metal binding domain containing protein, expressed	6.47895	1.74345	2.10729	4.20051	0	0	0.621718	2.51957
CRPG207	LOC_Os09g16790	transposon protein, putative, CACTA, En/Spm sub-class, expressed	6.47265	3.49672	3.50792	5.17151	2.77196	0	1.98465	6.57243
CRPG208	LOC_Os07g34370	gibberellin receptor, putative, expressed	6.46836	0.620528	1.29428	0	0	3.29767	0	0.489794
CRPG209	LOC_Os01g49720	glutathione S-transferase, putative, expressed	6.45086	5.09903	6.0912	4.77824	3.11883	0	5.07325	3.2874
CRPG210	LOC_Os11g26880	RALFL14 - Rapid ALkalinization Factor RALF family protein precursor, expressed	6.44326	3.38757	8.19378	3.8364	5.14634	2.38494	6.70424	3.08191
CRPG211	LOC_Os05g24500	terpene synthase, N-terminal domain containing protein, expressed	6.42891	4.6376	1.49417	0	0	0	1.46312	0
CRPG212	LOC_Os01g61170	prenylated rab acceptor, putative, expressed	6.42107	5.65894	4.35403	4.68201	5.02592	0	3.28621	3.87262
CRPG213	LOC_Os11g02100	peroxidase precursor, putative, expressed	6.41261	4.88088	1.82394	5.02435	1.40801	2.25621	3.86539	3.41075
CRPG214	LOC_Os09g16290	ABC-2 type transporter, putative, expressed	6.40241	2.30627	0	0.568601	0.493675	0	0	0
CRPG215	LOC_Os01g37460	zinc finger family protein, putative, expressed	6.38543	4.23449	4.64483	0.353668	0	0	0.817591	0
CRPG216	LOC_Os12g08700	expressed protein	6.33433	1.58359	3.31599	3.06035	0.860807	4.25644	1.51258	1.13979
CRPG217	LOC_Os11g09720	transposon protein, putative, CACTA, En/Spm sub-class, expressed	6.3127	3.39047	0.718058	0	4.36523	0	3.92862	1.37767
CRPG218	LOC_Os05g49100	WRKY49, expressed	6.30675	4.99422	3.70385	5.72849	1.8103	0	3.94608	5.89753
CRPG219	LOC_Os01g06890	leucine-rich repeat family protein, putative, expressed	6.28448	4.80443	4.50815	2.20281	1.80585	0	3.89724	3.91828
CRPG220	LOC_Os04g35390	expressed protein	6.26997	4.57827	4.43487	5.58944	2.63005	0	1.69657	1.42427
CRPG221	LOC_Os01g18110	cinnamoyl CoA reductase, putative, expressed	6.26682	2.43176	3.9194	4.58903	5.97377	2.38494	6.75198	1.13979
CRPG222	LOC_Os09g23620	MYB family transcription factor, putative, expressed	6.25413	3.93735	4.21091	3.7663	0	0	2.03384	3.1215
CRPG223	LOC_Os10g04800	expressed protein	6.21152	1.96747	0.570558	2.00422	0.531493	0	0	0
CRPG224	LOC_Os11g04710	cytochrome P450, putative, expressed	6.2069	4.24179	5.72786	3.68227	5.57788	3.23977	2.89123	3.84198
CRPG225	LOC_Os01g52380	expressed protein	6.19434	3.27475	0.608181	1.02011	0	0	1.69657	0.399383
CRPG226	LOC_Os02g55380	AP2 domain containing protein, expressed	6.18364	1.66409	3.17553	4.41906	3.41308	0	3.66402	4.38572
CRPG227	LOC_Os04g41380	Leucine Rich Repeat family protein, expressed	6.1775	4.27085	3.89589	5.28713	2.27454	3.09671	3.61353	5.52359
CRPG228	LOC_Os07g26550	expressed protein	6.16776	3.60233	2.40037	2.00645	1.18414	0	2.95195	4.23435
CRPG229	LOC_Os09g26999	keratin-associated protein 5-4, putative, expressed	6.16551	3.78855	6.34502	3.07979	3.60403	2.38494	4.10524	5.53089
CRPG230	LOC_Os02g30060	3-oxoacyl-reductase, chloroplast precursor, putative, expressed	6.1568	2.19905	2.98258	4.01842	0.86936	0	1.91838	0
CRPG231	LOC_Os01g52370	expressed protein	6.13596	4.5475	3.56259	4.0222	5.01835	4.01506	3.42901	4.94412
CRPG232	LOC_Os03g48610	galactosyltransferase family protein, putative, expressed	6.12437	5.20823	6.62381	4.64871	2.60248	0	5.563	5.63307
CRPG233	LOC_Os09g37470	OsSAUR52 - Auxin-responsive SAUR gene family member, expressed	6.11277	0.508172	2.48591	0.568601	2.71157	3.36165	1.45382	0.847389
CRPG234	LOC_Os07g34280	CXE carboxylesterase, putative, expressed	6.11076	2.17853	3.8925	0	0	0	1.51057	1.19339
CRPG235	LOC_Os01g52060	expressed protein	6.09132	1.87902	2.86712	4.92515	5.52317	3.76666	2.94508	2.30571
CRPG236	LOC_Os05g38880	expressed protein	6.0775	4.76384	6.30364	1.82344	1.44239	0	3.20024	2.56186
CRPG237	LOC_Os01g23070	expressed protein	6.05927	2.04185	1.38712	0.568601	0	0	0.524226	1.08783
CRPG238	LOC_Os04g12460	Leucine Rich Repeat family protein, expressed	6.04639	3.86568	5.15052	4.07389	3.18003	5.26915	2.68843	4.6872
CRPG239	LOC_Os06g46920	dihydroflavonol-4-reductase, putative, expressed	6.04395	3.82961	5.08179	2.85585	6.76162	2.38494	4.08908	3.35589
CRPG240	LOC_Os11g03840	D-mannose binding lectin family protein, expressed	6.04061	4.27012	3.99841	2.39438	1.19098	2.25621	5.00784	3.86602
CRPG241	LOC_Os07g06070	expressed protein	6.0385	4.48055	4.78024	3.4171	3.5303	2.25621	4.18369	2.07504
CRPG242	LOC_Os08g27759	expressed protein	6.02398	4.97639	3.06854	2.37261	2.39568	0	3.58617	6.23211
CRPG243	LOC_Os12g02814	retrotransposon protein, putative, unclassified, expressed	6.02146	4.52104	5.33193	3.08207	2.72686	5.11552	1.7206	4.30235
CRPG244	LOC_Os02g12090	expressed protein	6.02105	4.43183	3.7732	4.15501	0	2.25621	3.22265	0
CRPG245	LOC_Os04g39010	heavy metal associated domain containing protein, expressed	6.02069	4.09867	5.03075	0.353668	2.00984	0	2.16876	0.854785
CRPG246	LOC_Os10g39260	aspartic proteinase nepenthesin, putative, expressed	5.99997	3.88868	1.66845	3.93316	0.504696	0	1.69063	2.70662
CRPG247	LOC_Os01g65710	expressed protein	5.96854	4.30754	3.75174	3.7434	5.2466	0	5.11859	3.83169
CRPG248	LOC_Os02g18520	retrotransposon protein, putative, Ty3-gypsy subclass, expressed	5.96395	3.85918	2.05274	1.02765	2.88939	0	1.7604	1.98534
CRPG249	LOC_Os03g07400	expressed protein	5.9518	3.89173	4.43225	5.95101	4.60233	0	3.59446	2.59811
CRPG250	LOC_Os06g32730	eukaryotic initiation factor iso-4F subunit p82-34, putative, expressed	5.95124	2.32859	5.38325	2.79849	4.47205	0	3.05499	0
CRPG251	LOC_Os11g28540	expressed protein	5.94453	4.03573	2.10729	0	0	0	0	0
CRPG252	LOC_Os08g10180	retrotransposon protein, putative, unclassified, expressed	5.93318	3.51975	2.69841	0.964334	0	0	0.983216	0
CRPG253	LOC_Os04g48350	dehydration-responsive element-binding protein, putative, expressed	5.9302	2.25664	3.83615	3.73557	3.18255	0	5.30872	0.489794
CRPG254	LOC_Os10g37020	transposon protein, putative, unclassified, expressed	5.91443	0.211616	1.06435	0	0.493675	0	0	0
CRPG255	LOC_Os02g11870	expressed protein	5.90518	4.37507	2.91447	4.26129	0	3.36165	4.95284	4.53512
CRPG256	LOC_Os03g46420	expressed protein	5.90048	4.02965	5.62073	2.92893	0.898594	0	1.36702	4.70342
CRPG257	LOC_Os10g20610	laccase-15 precursor, putative, expressed	5.89832	1.44848	1.92024	0	0.919033	4.19217	3.38973	1.69849
CRPG258	LOC_Os01g64180	expressed protein	5.89022	3.07382	6.08082	5.18237	2.64738	0	3.95661	1.62923
CRPG259	LOC_Os08g10160	retrotransposon protein, putative, Ty3-gypsy subclass, expressed	5.88039	3.47139	2.68901	0	0	0	0.524226	0
CRPG260	LOC_Os02g30780	LGC1, putative, expressed	5.85727	0.620528	4.79109	2.90444	1.18414	0	4.10499	3.14889
CRPG261	LOC_Os03g10300	haemolysin-III, putative, expressed	5.84856	3.93166	1.31877	0.964334	0.504696	0	0.980317	2.39186
CRPG262	LOC_Os07g09625	expressed protein	5.83697	4.97568	6.99605	4.41639	8.54635	0	3.82948	2.07439
CRPG263	LOC_Os01g05170	expressed protein	5.81018	2.58986	1.59401	1.9779	2.16626	0	2.15247	1.55288
CRPG264	LOC_Os12g44050	purple acid phosphatase precursor, putative, expressed	5.81012	2.88747	2.75111	0	0	0	0.779358	0
CRPG265	LOC_Os10g03930	OsFBX355 - F-box domain containing protein, expressed	5.80583	4.15133	3.68569	3.29719	2.87263	3.62433	3.68951	4.04411
CRPG266	LOC_Os05g39790	transposon protein, putative, unclassified, expressed	5.80335	3.84218	0	0.558235	5.1888	0	3.70924	5.19632
CRPG267	LOC_Os01g62510	WRKY119, expressed	5.79812	4.05333	3.35053	0	1.18414	2.59835	1.8026	3.59185
CRPG268	LOC_Os10g02970	Leucine rich repeat N-terminal domain containing protein, putative, expressed	5.79293	3.54112	3.39637	2.83527	0.919033	0	2.67369	1.38581
CRPG269	LOC_Os04g45100	expressed protein	5.76378	4.0636	2.50742	1.47746	0	2.59835	1.71108	3.0797
CRPG270	LOC_Os04g06910	expressed protein	5.76339	0.211616	5.72124	2.78873	0.898594	6.04211	0	0
CRPG271	LOC_Os05g33670	expressed protein	5.74685	4.34705	4.85872	4.43326	3.6116	2.38494	3.41656	2.49747
CRPG272	LOC_Os02g57350	expressed protein	5.72942	3.97652	1.40839	4.8594	3.10733	0	3.39606	4.60704
CRPG273	LOC_Os02g34520	retrotransposon protein, putative, Ty1-copia subclass, expressed	5.7251	2.07253	4.89077	2.46264	2.13521	3.47403	2.28296	2.30356
CRPG274	LOC_Os02g27200	expressed protein	5.72402	4.80787	1.0909	1.70356	2.60879	4.40761	1.94402	4.73893
CRPG275	LOC_Os01g46440	VQ domain containing protein, putative, expressed	5.71944	0.94797	1.22152	0	0.531493	0	0	0.85327
CRPG276	LOC_Os03g47280	VQ domain containing protein, putative, expressed	5.70934	3.84582	3.868	2.81997	2.41604	0	4.85034	4.49644
CRPG277	LOC_Os05g05080	expressed protein	5.6961	2.22731	2.94482	1.7102	1.80585	0	2.03713	4.68596
CRPG278	LOC_Os08g09000	Cupin domain containing protein, expressed	5.68626	3.25231	1.85798	4.15939	0.493675	0	1.64681	2.61612
CRPG279	LOC_Os01g56260	expressed protein	5.68546	3.83033	2.44403	3.04375	2.96381	4.54447	1.71694	3.25135
CRPG280	LOC_Os04g50212	expressed protein	5.68276	3.24178	2.34324	3.54576	2.49515	0	2.36427	0.847389
CRPG281	LOC_Os10g41660	zinc finger, C3HC4 type domain containing protein, expressed	5.66869	4.3577	5.15177	4.05044	3.18848	0	5.80908	3.51529
CRPG282	LOC_Os08g37150	DUF617 domain containing protein, expressed	5.66408	3.01498	5.09687	1.32224	2.69147	0	1.66002	1.86418
CRPG283	LOC_Os06g03050	expressed protein	5.66382	0.576737	5.94968	0	0	0	0	0.565887
CRPG284	LOC_Os04g44600	CRP1 - Cysteine-rich family protein precursor, expressed	5.65804	4.36882	4.53148	1.28348	2.50489	0	2.45135	2.20319
CRPG285	LOC_Os01g49710	glutathione S-transferase, putative, expressed	5.65231	4.33443	5.20521	4.86965	6.14349	2.59835	4.16853	3.59429
CRPG286	LOC_Os07g11770	expressed protein	5.64232	2.91698	3.39637	1.79174	1.60925	0	0.524226	2.02132
CRPG287	LOC_Os11g06150	basic proline-rich protein precursor, putative, expressed	5.63678	2.75634	3.31608	0	0.493675	3.85822	0	0.971291
CRPG288	LOC_Os09g16060	expressed protein	5.63077	0	0.403249	2.25477	0.531493	2.38494	0	0
CRPG289	LOC_Os01g48290	dof zinc finger domain containing protein, putative, expressed	5.62707	4.33402	4.32599	5.58753	4.04505	3.36165	4.10219	4.69384
CRPG290	LOC_Os02g37280	heavy metal transport/detoxification protein, putative, expressed	5.62485	3.45973	3.17443	0.807579	0.504696	0	1.84518	0.847389
CRPG291	LOC_Os08g08990	Cupin domain containing protein, expressed	5.62471	3.26106	3.11697	4.14395	0	0	0.524226	1.99137
CRPG292	LOC_Os04g53060	NBS-LRR disease resistance protein, putative, expressed	5.61667	3.95204	2.98276	3.7434	6.55768	2.59835	4.096	3.58472
CRPG293	LOC_Os02g32440	expressed protein	5.61508	3.78884	3.72215	4.31105	5.01983	0	4.17356	4.78196
CRPG294	LOC_Os09g34330	helix-loop-helix DNA-binding domain containing protein, expressed	5.61372	3.47113	4.54885	0	0.531493	0	0	1.08783
CRPG295	LOC_Os08g09040	Cupin domain containing protein, expressed	5.60345	3.37352	1.93601	4.38081	0.493675	2.59835	2.1165	3.04283
CRPG296	LOC_Os05g03960	expressed protein	5.59855	4.08288	2.7848	0.637481	3.10105	0	3.40683	1.62404
CRPG297	LOC_Os10g34730	GEM, putative, expressed	5.58761	4.15017	5.41453	4.54175	3.24268	0	2.35942	3.14919
CRPG298	LOC_Os11g35080	expressed protein	5.58523	3.50949	6.69812	5.3047	0.493675	0	3.84696	5.46106
CRPG299	LOC_Os01g66760	inactive receptor kinase At2g26730 precursor, putative, expressed	5.58429	4.26637	4.56881	2.28154	2.59477	2.25621	1.39257	6.83388
CRPG300	LOC_Os10g17690	NB-ARC domain containing protein, expressed	5.57531	3.74091	3.59211	4.87745	3.37475	2.38494	3.21628	2.98489
CRPG301	LOC_Os08g34890	OsFBDUF46 - F-box and DUF domain containing protein, expressed	5.5732	4.26258	4.79738	2.1364	5.63118	4.46317	4.00781	5.06533
CRPG302	LOC_Os12g32390	expressed protein	5.56119	3.11057	3.8241	1.02011	0.504696	0	2.53776	0.971291
CRPG303	LOC_Os09g04624	GDSL-like lipase/acylhydrolase, putative, expressed	5.56056	3.89936	7.96556	0.558235	2.15769	5.79018	2.68932	0
CRPG304	LOC_Os04g06900	expressed protein	5.55687	0.375028	2.28561	4.60138	0	0	0	0
CRPG305	LOC_Os11g35980	leucine rich repeat protein, putative, expressed	5.55103	4.49946	4.96294	0	0	0	0	0
CRPG306	LOC_Os06g06450	heat shock protein STI, putative, expressed	5.54783	3.67543	3.54299	4.70539	4.42019	2.59835	4.46012	4.33135
CRPG307	LOC_Os05g34530	auxin-inducible protein, putative, expressed	5.54738	2.50452	1.55466	1.32583	0	0	0.779358	1.54833
CRPG308	LOC_Os02g11980	receptor-like protein kinase precursor, putative, expressed	5.53853	3.92352	2.96775	3.14028	0.86936	0	3.14308	4.72149
CRPG309	LOC_Os07g04020	expressed protein	5.53314	2.72011	8.10917	4.83679	3.02134	0	4.73608	1.80338
CRPG310	LOC_Os09g07780	pentatricopeptide repeat protein PPR986-12, putative, expressed	5.53268	4.09515	4.65228	4.38806	3.21557	2.59835	3.07666	4.71581
CRPG311	LOC_Os05g01256	helix-loop-helix DNA-binding domain containing protein, expressed	5.52756	5.03081	6.98595	1.90718	4.55385	4.66946	3.31355	3.46699
CRPG312	LOC_Os11g40360	transposon protein, putative, unclassified, expressed	5.52327	2.2393	0.608181	0	2.27131	0	0	0.565887
CRPG313	LOC_Os03g30150	expressed protein	5.51179	1.49174	2.05403	2.44237	2.51017	0	2.36316	2.74221
CRPG314	LOC_Os02g45850	B3 DNA binding domain containing protein, expressed	5.50037	3.87772	4.13347	4.28727	4.73669	0	1.99316	1.08283
CRPG315	LOC_Os01g23430	transposon protein, putative, unclassified, expressed	5.49475	1.82786	0.570558	0	1.43397	5.48479	0	2.07439
CRPG316	LOC_Os04g55950	expressed protein	5.47509	1.52683	2.43223	1.67108	5.22887	0	2.27901	2.84298
CRPG317	LOC_Os01g27340	glutathione S-transferase, putative, expressed	5.475	3.25842	2.00919	0.353668	1.19098	0	1.78898	3.43346
CRPG318	LOC_Os12g40100	expressed protein	5.46961	3.53499	5.74302	1.67306	0	0	1.02904	0.785081
CRPG319	LOC_Os01g25500	sterol carrier protein-2, putative, expressed	5.43965	2.35614	8.67575	3.33284	1.79932	0	3.52136	5.20982
CRPG320	LOC_Os01g58450	retrotransposon protein, putative, Ty1-copia subclass, expressed	5.43963	4.04345	3.57779	5.82974	4.43982	0	2.70989	3.50475
CRPG321	LOC_Os07g12240	EF hand family protein, putative, expressed	5.41791	3.61826	2.12159	2.74104	0	0	0.40523	1.42821
CRPG322	LOC_Os01g24920	poly synthetase 2-B, putative, expressed	5.39174	4.44774	4.29989	4.20239	4.37693	0	3.78857	3.91613
CRPG323	LOC_Os11g09150	expressed protein	5.38499	3.93708	4.72673	3.27018	5.22005	0	4.63856	2.90358
CRPG324	LOC_Os10g04429	transferase family protein, putative, expressed	5.36927	4.26371	7.18469	1.32583	0.504696	2.25621	0.897632	0.914214
CRPG325	LOC_Os03g49790	pattern formation protein EMB30, putative, expressed	5.35398	1.12321	0.403249	1.75667	2.12095	0	0	0.785081
CRPG326	LOC_Os04g03100	OsSub35 - Putative Subtilisin homologue, expressed	5.35167	3.27759	0.85406	0	0	0	0.621718	0
CRPG327	LOC_Os11g37920	DJ-1 family protein, putative, expressed	5.34634	3.81114	6.57329	4.65061	3.24433	5.11798	3.7779	0.785081
CRPG328	LOC_Os01g69190	regulatory protein, putative, expressed	5.31488	1.96719	2.17452	1.66825	0	0	2.46205	2.17797
CRPG329	LOC_Os01g16660	transposon protein, putative, unclassified, expressed	5.30199	3.90513	3.31621	4.1485	4.18298	2.38494	3.15323	4.39188
CRPG330	LOC_Os04g33370	cytochrome P450, putative, expressed	5.2925	0.717719	9.08375	1.32836	7.7642	0	8.26625	1.03008
CRPG331	LOC_Os02g26430	WRKY42, expressed	5.29123	2.71769	2.28463	1.53629	3.06613	4.08756	1.24182	1.83296
CRPG332	LOC_Os01g70150	expressed protein	5.28883	2.64296	0.885043	0.964334	0	0	0.524226	0
CRPG333	LOC_Os02g43560	WRKY34, expressed	5.28713	3.33584	4.76546	0	0	0	0.897632	0.399383
CRPG334	LOC_Os05g15350	expressed protein	5.26947	3.65395	3.6112	3.06891	2.15769	0	3.57914	5.30255
CRPG335	LOC_Os10g03230	expressed protein	5.24866	3.9664	2.54742	1.15921	5.68893	0	2.48107	3.23891
CRPG336	LOC_Os06g36000	AP2 domain containing protein, expressed	5.24517	1.26394	3.30518	2.672	0	0	3.50112	0.489794
CRPG337	LOC_Os09g08950	expressed protein	5.23781	1.48345	2.54593	0	0	0	0	0
CRPG338	LOC_Os05g47860	expressed protein	5.22881	1.81944	1.85673	2.13201	0	0	1.69657	3.60245
CRPG339	LOC_Os10g04625	expressed protein	5.22226	3.13552	1.84228	0.816305	3.25893	3.09671	1.10737	0
CRPG340	LOC_Os01g62514	WRKY56, expressed	5.21969	4.03069	3.93481	0	0	0	2.49746	4.85439
CRPG341	LOC_Os02g26330	expressed protein	5.21655	3.62489	5.80629	5.42177	4.17895	4.01506	4.26854	4.2352
CRPG342	LOC_Os02g44040	expressed protein	5.18797	0.817435	0	3.09869	0	0	2.79467	6.76965
CRPG343	LOC_Os08g35300	expressed protein	5.18734	2.09771	0	0.964334	0	0	0	0
CRPG344	LOC_Os03g47564	expressed protein	5.17284	4.04943	3.74359	4.80217	4.59004	3.09671	4.7086	4.19576
CRPG345	LOC_Os01g53210	metal transporter Nramp3, putative, expressed	5.16137	3.56293	3.39045	3.28962	4.47107	4.01506	3.16746	3.37972
CRPG346	LOC_Os01g72270	cytochrome P450, putative, expressed	5.15707	2.11329	4.03058	0	0	0	0	1.63012
CRPG347	LOC_Os01g72300	Cupin domain containing protein, expressed	5.14864	2.59617	6.50181	0.964334	0	0	0	0
CRPG348	LOC_Os04g15630	xa21, putative, expressed	5.13117	1.96938	1.66845	2.04442	1.20093	0	3.04496	1.19458
CRPG349	LOC_Os01g53470	harpin-induced protein 1 domain containing protein, expressed	5.12788	3.38253	2.21239	3.08494	1.62953	0	3.32366	3.43346
CRPG350	LOC_Os08g31250	C1-like domain containing protein, expressed	5.12387	2.8725	0.97834	3.62871	0.919033	0	2.3862	3.73915
CRPG351	LOC_Os12g34430	retrotransposon protein, putative, unclassified, expressed	5.09188	1.30383	1.45217	0	0.504696	2.38494	0.40523	0.711837
CRPG352	LOC_Os10g25340	GDSL-like lipase/acylhydrolase, putative, expressed	5.0838	0.619644	0.403249	3.38534	3.57495	0	1.81537	0
CRPG353	LOC_Os01g02530	retrotransposon protein, putative, unclassified, expressed	5.07037	4.39838	3.02537	2.79978	3.74732	4.37702	3.8661	3.79977
CRPG354	LOC_Os12g27470	expressed protein	5.06004	1.82803	2.44403	1.15921	0.504696	0	2.09095	4.62698
CRPG355	LOC_Os02g41830	expressed protein	5.03971	2.72033	2.0809	0.568601	4.49992	0	5.23497	2.95413
CRPG356	LOC_Os04g32790	AP2 domain containing protein, expressed	5.01553	0.801641	1.49417	2.88329	1.19098	0	3.1369	0
CRPG357	LOC_Os06g02810	expressed protein	5.0148	3.54007	7.5187	2.10647	0.493675	0	3.70307	0
CRPG358	LOC_Os06g49350	retrotransposon protein, putative, unclassified, expressed	5.01109	2.76184	2.13441	1.79357	0.890214	0	1.90068	3.90442
CRPG359	LOC_Os02g42470	expressed protein	5.00744	3.74218	4.19201	3.7218	5.02735	0	2.472	4.90106
CRPG360	LOC_Os02g12350	histone deacetylase, putative, expressed	5.00337	3.91853	3.41246	3.17235	1.40213	2.25621	2.79938	5.26421
CRPG361	LOC_Os05g43660	expressed protein	4.97092	2.24478	3.06121	1.66626	2.85882	2.38494	5.38594	0
CRPG362	LOC_Os06g32720	zinc finger C-x8-C-x5-C-x3-H type family protein, expressed	4.95734	1.64983	5.02364	3.45472	3.61317	0	3.21773	0
CRPG363	LOC_Os12g04690	embryogenesis transmembrane protein, putative, expressed	4.94381	3.18412	2.43297	3.4638	1.45644	4.28971	2.27623	2.1559
CRPG364	LOC_Os11g01860	pentatricopeptide, putative, expressed	4.94322	3.45622	3.62533	3.06966	3.46525	3.09671	3.73227	4.61819
CRPG365	LOC_Os10g39660	expressed protein	4.92868	3.49555	6.16012	3.34833	3.60087	4.01506	3.08355	3.83205
CRPG366	LOC_Os09g25700	TsetseEP precursor, putative, expressed	4.90705	2.15379	2.57698	1.32836	0.531493	0	2.77362	0.489794
CRPG367	LOC_Os02g50220	expressed protein	4.90192	3.53964	2.98201	1.90718	3.4853	3.17002	2.54259	2.93678
CRPG368	LOC_Os05g49810	armadillo/beta-catenin-like repeat containing protein, expressed	4.89224	3.6342	4.68172	5.38348	5.85994	0	5.39886	3.33326
CRPG369	LOC_Os02g34130	transposon protein, putative, CACTA, En/Spm sub-class, expressed	4.88788	2.34929	0	0	1.4197	0	0	0
CRPG370	LOC_Os04g41370	Leucine Rich Repeat family protein, expressed	4.87681	3.34025	2.70637	4.32686	1.62683	2.38494	3.20792	4.529
CRPG371	LOC_Os02g37760	lecithine cholesterol acyltransferase, putative, expressed	4.86859	1.94999	3.82805	0	0	0	1.33089	0
CRPG372	LOC_Os09g25690	retrotransposon protein, putative, unclassified, expressed	4.86471	1.26339	3.82411	0.807579	0	0	0	1.14459
CRPG373	LOC_Os10g03960	expressed protein	4.85714	3.27832	3.67215	1.58219	3.03165	2.59835	4.88873	3.20189
CRPG374	LOC_Os05g37000	expressed protein	4.85307	2.63844	3.06703	1.02765	0.919033	0	0.907908	1.3879
CRPG375	LOC_Os02g38000	retrotransposon protein, putative, unclassified, expressed	4.85205	2.42739	2.03917	1.15234	0.493675	2.25621	4.14163	2.32616
CRPG376	LOC_Os10g01660	transferase family protein, putative, expressed	4.84405	1.62419	2.26037	2.36545	0.493675	0	3.96764	0
CRPG377	LOC_Os03g09830	expressed protein	4.83849	3.4434	3.69002	2.7401	2.60997	4.28971	4.33219	2.63732
CRPG378	LOC_Os02g12680	cytochrome P450, putative, expressed	4.83778	2.23891	0.570558	2.37261	0.860807	2.59835	0.40523	7.14978
CRPG379	LOC_Os03g44870	expressed protein	4.83457	4.11755	5.02581	4.92671	4.34437	0	4.52252	2.41461
CRPG380	LOC_Os04g54610	expressed protein	4.83205	1.80671	1.42956	4.20523	0.531493	2.38494	1.66789	1.42821
CRPG381	LOC_Os01g16380	expressed protein	4.82613	3.8735	1.31877	1.93646	4.05871	0	2.77679	1.6258
CRPG382	LOC_Os01g64140	endoglucanase 22 precursor, putative, expressed	4.82151	2.69762	2.63394	3.39592	2.61878	0	4.19787	3.48597
CRPG383	LOC_Os09g37400	OsSAUR45 - Auxin-responsive SAUR gene family member, expressed	4.81446	1.48185	2.96714	3.52128	2.39272	3.81317	2.62892	2.1797
CRPG384	LOC_Os11g40930	expressed protein	4.80099	3.53244	3.04779	0	0	0	0	0
CRPG385	LOC_Os08g35330	expressed protein	4.78357	2.67655	2.83496	2.28734	1.83639	0	1.44679	1.28953
CRPG386	LOC_Os12g08930	expressed protein	4.77523	2.13185	1.90505	1.28348	0.890214	4.34987	0.980317	4.61818
CRPG387	LOC_Os01g29280	expressed protein	4.74508	2.14703	3.17493	3.32049	4.78858	0	0.40523	0
CRPG388	LOC_Os07g08080	expressed protein	4.74376	3.55679	1.70493	2.3321	0	2.59835	1.83035	1.42224
CRPG389	LOC_Os09g38840	OsWAK90 - OsWAK receptor-like protein kinase, expressed	4.73969	3.18353	3.66286	2.49361	0.493675	0	1.02904	0
CRPG390	LOC_Os12g37070	expressed protein	4.72104	1.07004	0	0	0.493675	3.29767	0.897632	0.489794
CRPG391	LOC_Os07g08800	expressed protein	4.70642	2.17503	1.22152	0	0	0	0	0
CRPG392	LOC_Os02g12410	U-box domain-containing protein, putative, expressed	4.65332	3.45172	3.13641	4.48445	2.81314	2.59835	3.85378	3.13557
CRPG393	LOC_Os08g34390	retrotransposon protein, putative, unclassified, expressed	4.64494	0.375028	1.45217	0	0	0	3.04116	3.8405
CRPG394	LOC_Os05g09280	AGAP006957-PA, putative, expressed	4.64357	2.6386	2.8017	0.353668	1.97885	0	0	1.08283
CRPG395	LOC_Os03g40250	Leucine Rich Repeat family protein, expressed	4.6413	3.15076	4.21134	2.6144	2.88939	0	2.63963	4.98516
CRPG396	LOC_Os04g20880	wax synthase isoform 1, putative, expressed	4.63745	3.3563	4.72423	4.40069	3.82788	0	2.13613	3.29832
CRPG397	LOC_Os02g41480	OsWAK12 - OsWAK receptor-like cytoplasmic kinase OsWAK-RLCK, expressed	4.61412	1.9674	2.36615	4.08409	2.7303	0	1.36702	0
CRPG398	LOC_Os08g44180	expressed protein	4.61229	3.38836	3.49678	4.15106	4.8533	2.25621	5.25007	2.82722
CRPG399	LOC_Os03g50250	DnaK family protein, putative, expressed	4.60078	1.47923	2.35524	2.04966	1.67343	2.25621	3.30417	2.54269
CRPG400	LOC_Os01g28134	expressed protein	4.56737	2.2093	2.81929	2.39559	3.70014	0	2.41261	3.58629
CRPG401	LOC_Os01g51790	expressed protein	4.56582	3.2654	3.48202	3.52183	3.18518	4.00982	2.78414	4.24652
CRPG402	LOC_Os06g50530	expressed protein	4.55817	2.01326	1.84212	3.13069	3.5304	0	2.52083	0.399383
CRPG403	LOC_Os06g02800	expressed protein	4.55684	3.12327	6.43995	1.67786	0.531493	0	1.48704	0
CRPG404	LOC_Os08g25670	expressed protein	4.54604	2.25922	1.77532	1.87066	1.20093	0	1.17317	2.12559
CRPG405	LOC_Os12g35490	expressed protein	4.54545	2.12682	1.66845	0.637481	2.60623	0	4.32069	4.22222
CRPG406	LOC_Os10g39350	aspartic proteinase nepenthesin, putative, expressed	4.52534	0.373786	0	0	0	0	0	0.565887
CRPG407	LOC_Os09g37394	OsSAUR44 - Auxin-responsive SAUR gene family member, expressed	4.52046	2.08279	4.56361	1.66909	1.84074	2.59835	1.12915	3.6422
CRPG408	LOC_Os10g20080	expressed protein	4.52015	2.97319	2.8098	4.09475	4.41227	2.25621	2.21506	0.489794
CRPG409	LOC_Os10g02250	OsWAK95 - OsWAK receptor-like protein kinase, expressed	4.50113	0.878355	1.06435	1.43607	0	0	0.621718	1.33901
CRPG410	LOC_Os07g19120	retrotransposon protein, putative, unclassified	4.49318	1.58113	0	0	0	0	0	0
CRPG411	LOC_Os07g05450	sulfotransferase domain containing protein, expressed	4.4923	1.41646	2.16073	2.07984	0	0	0.779358	1.14459
CRPG412	LOC_Os03g08540	expressed protein	4.49066	1.88276	4.61494	3.55208	2.95687	3.09671	3.27814	2.82834
CRPG413	LOC_Os03g46290	expressed protein	4.48752	2.16717	1.0909	0.637481	0	0	0.907908	1.03008
CRPG414	LOC_Os10g36360	expressed protein	4.48634	0.375028	2.45538	3.39157	0	0	2.76009	4.71122
CRPG415	LOC_Os04g15600	receptor kinase, putative, expressed	4.48104	2.96178	1.79176	2.22999	2.26009	0	3.37397	3.22153
CRPG416	LOC_Os07g11980	expressed protein	4.4705	2.65851	0.608181	1.25642	4.37121	4.40765	1.33624	1.76609
CRPG417	LOC_Os02g57810	cytochrome P450, putative, expressed	4.46008	1.62485	1.36531	0.558235	3.73954	3.36165	1.10737	0.489794
CRPG418	LOC_Os04g15610	retrotransposon protein, putative, Ty3-gypsy subclass, expressed	4.45881	2.20393	1.03469	0.967576	1.97121	0	1.13791	0
CRPG419	LOC_Os07g36560	transferase family protein, putative, expressed	4.45678	2.76988	1.55331	0.967576	2.39568	0	1.85601	0.489794
CRPG420	LOC_Os06g23260	transposon protein, putative, CACTA, En/Spm sub-class, expressed	4.4543	2.64256	4.3173	0	0	0	4.11187	0.847389
CRPG421	LOC_Os04g48200	cytochrome P450, putative, expressed	4.43163	0.945632	7.32997	0.353668	4.04621	0	1.30966	1.14459
CRPG422	LOC_Os04g27350	retrotransposon protein, putative, LINE subclass	4.42449	0	0	0	0	0	0.721241	0.85327
CRPG423	LOC_Os03g56180	legume lectins beta domain containing protein, expressed	4.42284	2.50714	5.04078	1.15921	0	0	0.621718	0.914214
CRPG424	LOC_Os03g14920	expressed protein	4.41568	2.93836	4.17933	2.66818	0.493675	0	2.2334	2.37027
CRPG425	LOC_Os05g45330	expressed protein	4.40815	2.90374	2.70719	1.58008	2.69147	0	3.1703	3.46723
CRPG426	LOC_Os09g03700	retrotransposon protein, putative, unclassified, expressed	4.39933	3.31544	2.18688	2.53886	3.89461	2.25621	2.46911	1.14583
CRPG427	LOC_Os05g23410	expressed protein	4.38347	1.78395	2.4545	1.29234	0.504696	0	2.41369	6.33486
CRPG428	LOC_Os07g31070	expressed protein	4.37933	1.8882	1.27125	0.964334	4.19939	4.40761	0.779358	0
CRPG429	LOC_Os02g48280	expressed protein	4.3762	0.375028	2.54674	2.73645	0.531493	0	0	0.565887
CRPG430	LOC_Os05g11610	expressed protein	4.37379	1.54303	0	0.353668	0	0	0.621718	0
CRPG431	LOC_Os07g30690	indole-3-acetate beta-glucosyltransferase, putative, expressed	4.36761	1.03542	5.83983	0.964334	2.82622	2.38494	0	0
CRPG432	LOC_Os08g28470	disease resistance protein RPM1, putative, expressed	4.36677	1.10843	2.66252	3.97751	2.50067	0	2.80056	3.63986
CRPG433	LOC_Os02g34120	expressed protein	4.35968	0.878973	0	0	0.504696	3.17002	0	0
CRPG434	LOC_Os04g49170	zinc finger, C3HC4 type domain containing protein, expressed	4.34367	3.27573	3.97939	0.558235	3.48047	2.25621	4.35308	2.10396
CRPG435	LOC_Os07g11870	cytochrome P450, putative, expressed	4.33772	0.375028	3.49216	0	0.860807	2.25621	6.25476	0
CRPG436	LOC_Os07g02674	expressed protein	4.3228	1.4492	1.63257	0.637481	3.44172	2.25621	1.64498	1.38686
CRPG437	LOC_Os06g41870	expressed protein	4.31513	0	0	2.25666	0	0	0	0.399383
CRPG438	LOC_Os03g39650	cytochrome P450, putative, expressed	4.31268	1.12224	4.77013	2.37139	2.26485	0	4.40112	0
CRPG439	LOC_Os06g32790	retrotransposon protein, putative, unclassified, expressed	4.30145	2.86338	1.45217	1.62171	2.85997	0	0.40523	1.76849
CRPG440	LOC_Os09g35600	MATE domain containing protein, expressed	4.29069	1.35511	5.83597	2.12851	7.73019	0	5.51405	1.96078
CRPG441	LOC_Os05g37920	expressed protein	4.28789	3.4547	2.56666	3.9221	4.07481	0	1.54448	3.28441
CRPG442	LOC_Os09g10380	transposon protein, putative, unclassified, expressed	4.28636	1.84541	0.608181	0	1.17727	2.38494	1.69657	2.45762
CRPG443	LOC_Os05g07120	basic helix-loop-helix, putative, expressed	4.27991	1.62496	0	0	0	0	1.02904	4.69827
CRPG444	LOC_Os06g10820	helix-loop-helix DNA-binding domain containing protein, expressed	4.27799	1.82293	1.79176	0.568601	1.63688	0	0	0.847389
CRPG445	LOC_Os09g21040	expressed protein	4.26624	3.00147	1.24559	3.05145	3.49224	0	4.48893	4.21027
CRPG446	LOC_Os11g40850	expressed protein	4.25262	2.64389	0	0	0	0	0	0
CRPG447	LOC_Os01g56690	helix-loop-helix DNA-binding domain containing protein, expressed	4.2493	1.89509	1.31877	2.63386	4.53882	0	1.20237	1.89614
CRPG448	LOC_Os11g43810	retrotransposon protein, putative, Ty3-gypsy subclass, expressed	4.23836	2.24336	2.77731	2.23594	2.79995	0	2.0846	3.13708
CRPG449	LOC_Os02g35240	dehydration-responsive element-binding protein, putative, expressed	4.23784	0	1.2959	0	0	0	0	1.38581
CRPG450	LOC_Os02g29640	transposon protein, putative, unclassified, expressed	4.22624	1.43987	5.28191	0	1.63186	2.38494	0	0
CRPG451	LOC_Os03g07720	expressed protein	4.22472	0.507656	0.608181	1.79798	2.9318	3.72506	4.16987	4.7062
CRPG452	LOC_Os05g07450	S-domain receptor-like protein kinase, putative, expressed	4.22471	1.19638	4.37451	2.83346	0	0	0	0.399383
CRPG453	LOC_Os01g41740	expressed protein	4.22402	3.22661	3.14932	2.74562	1.98097	3.36165	2.91844	3.9921
CRPG454	LOC_Os07g02900	DUF538 domain containing protein, putative, expressed	4.21978	2.97349	1.03469	2.44072	3.03355	3.36165	3.00976	3.95151
CRPG455	LOC_Os06g11830	hAT dimerisation domain-containing protein, putative, expressed	4.21284	2.26453	0	0	0.504696	0	0	0
CRPG456	LOC_Os07g19090	zinc knuckle domain containing protein, expressed	4.20682	0.508172	0	0.816305	0	0	2.34137	1.13979
CRPG457	LOC_Os10g08610	expressed protein	4.19764	2.16437	2.77711	1.43373	3.65041	2.25621	2.27452	0.971291
CRPG458	LOC_Os12g37330	retrotransposon protein, putative, Ty3-gypsy subclass, expressed	4.19064	0	0	0	0	0	0	0
CRPG459	LOC_Os01g39136	retrotransposon protein, putative, unclassified, expressed	4.18564	1.77286	3.68102	3.46796	1.18414	0	5.54892	2.10022
CRPG460	LOC_Os05g37600	glycerol-3-phosphate acyltransferase, putative, expressed	4.18333	2.79691	8.66195	0.568601	0.531493	7.09812	1.24182	1.38174
CRPG461	LOC_Os12g29300	CESA10 - cellulose synthase, expressed	4.17736	2.21532	1.29428	4.32315	3.99743	0	0.817591	3.09482
CRPG462	LOC_Os12g39780	retrotransposon protein, putative, unclassified, expressed	4.16578	3.01146	2.05274	0.353668	3.42752	2.25621	3.54908	2.63776
CRPG463	LOC_Os02g28870	U-box domain-containing protein, putative, expressed	4.14875	3.27874	3.18178	2.94624	1.83437	0	4.39493	2.98421
CRPG464	LOC_Os09g28440	AP2 domain containing protein, expressed	4.14778	0.788353	2.03801	1.32836	2.26485	2.59835	6.44203	1.50659
CRPG465	LOC_Os02g33590	U-box domain-containing protein, putative, expressed	4.14695	1.53465	1.66845	2.04595	2.28712	4.76091	1.13791	3.28712
CRPG466	LOC_Os12g04230	expressed protein	4.13816	2.43591	2.47577	2.97978	3.53827	3.36165	0	0
CRPG467	LOC_Os09g16070	expressed protein	4.13616	2.08911	3.54863	4.01827	1.63688	0	1.20237	0.854785
CRPG468	LOC_Os11g22370	retrotransposon protein, putative, Ty1-copia subclass, expressed	4.13556	2.76972	3.03296	2.31426	3.7052	0	1.53788	0.399383
CRPG469	LOC_Os01g40950	expressed protein	4.12464	1.81143	1.65053	0	0.504696	0	0.524226	1.08783
CRPG470	LOC_Os04g43580	DUF640 domain containing protein, putative, expressed	4.11865	0	2.28467	0	0.890214	0	0.40523	0
CRPG471	LOC_Os11g31800	expressed protein	4.11398	0.619644	0	0	5.36516	0	1.20237	0
CRPG472	LOC_Os07g26720	OsRR7 type-A response regulator, expressed	4.11121	0.619202	1.59269	2.49857	0	0	1.28258	0
CRPG473	LOC_Os01g18090	expressed protein	4.10448	2.34525	2.38885	3.63016	2.78767	0	1.42721	5.25157
CRPG474	LOC_Os10g12090	expressed protein	4.09005	2.3018	3.40136	1.15638	1.65412	0	1.83414	0
CRPG475	LOC_Os02g27450	expressed protein	4.08897	1.34276	0.570558	0.964334	1.84074	3.8962	1.10737	0.85327
CRPG476	LOC_Os06g18780	transposon protein, putative, CACTA, En/Spm sub-class, expressed	4.08032	1.62485	6.44131	2.31245	0	0	0.40523	0
CRPG477	LOC_Os09g06220	retrotransposon protein, putative, unclassified, expressed	4.07246	1.76953	1.88872	3.17997	1.63186	0	3.26975	3.18553
CRPG478	LOC_Os03g55880	expressed protein	4.0665	0	2.45465	3.54816	1.45644	0	1.20237	2.4166
CRPG479	LOC_Os03g26620	3-ketoacyl-CoA synthase, putative, expressed	4.0661	0.818213	0.570558	0	0.860807	7.151	0.524226	0
CRPG480	LOC_Os02g25610	expressed protein	4.06213	2.99431	2.50682	2.14479	3.68288	3.77291	1.02904	0.847389
CRPG481	LOC_Os12g03670	D-mannose binding lectin family protein, expressed	4.05586	1.59704	0.570558	3.99251	0	0	0.983216	3.87481
CRPG482	LOC_Os09g33640	expressed protein	4.05575	0.879281	1.27125	2.3535	1.47596	0	0	0
CRPG483	LOC_Os03g58500	expressed protein	4.03982	1.22037	0.403249	0	0	0	0	2.1529
CRPG484	LOC_Os12g22970	expressed protein	4.03556	0.717719	0	0	1.17727	0	3.37095	4.93854
CRPG485	LOC_Os08g30870	YDG/SRA domain containing protein, expressed	4.02515	2.23008	2.07977	2.17025	2.90596	2.25621	3.83043	3.01202
CRPG486	LOC_Os04g34120	expressed protein	4.02396	2.55072	1.80938	2.72395	3.74008	0	0	0
CRPG487	LOC_Os02g03310	KH domain containing protein, putative, expressed	4.02064	1.62529	3.28651	1.5873	2.50342	2.25621	4.42616	1.38279
CRPG488	LOC_Os10g01690	transferase family protein, putative, expressed	3.99723	1.41675	1.22152	0	0	0	0	1.13979
CRPG489	LOC_Os08g02590	expressed protein	3.99099	1.32393	2.74247	1.36943	1.62683	0	1.78341	1.66513
CRPG490	LOC_Os11g38360	retrotransposon protein, putative, unclassified, expressed	3.97782	1.84566	0	0	4.14018	0	1.50381	3.35667
CRPG491	LOC_Os09g38150	expressed protein	3.96623	2.29601	3.02554	0.568601	1.40801	0	1.93234	0.399383
CRPG492	LOC_Os09g09450	PPR repeat domain containing protein, putative, expressed	3.96401	2.43582	1.31718	2.20556	2.1281	0	2.2869	3.84887
CRPG493	LOC_Os04g15620	retrotransposon protein, putative, Ty3-gypsy subclass, expressed	3.96276	1.57271	0	0.353668	0.877861	0	0.779358	0
CRPG494	LOC_Os09g37460	OsSAUR51 - Auxin-responsive SAUR gene family member, expressed	3.95843	0.620528	3.15592	2.11801	2.50616	2.59835	0	0
CRPG495	LOC_Os12g41570	expressed protein	3.94161	2.3373	1.55466	2.91597	0	0	2.02557	0.399383
CRPG496	LOC_Os12g34550	ribosomal protein S15 containing protein, expressed	3.93206	2.19336	1.31718	0.816305	0.531493	0	1.24182	1.59332
CRPG497	LOC_Os04g23600	D-mannose binding lectin family protein, expressed	3.9262	2.11659	1.92009	1.67108	0.531493	0	2.03384	4.12741
CRPG498	LOC_Os07g26595	expressed protein	3.92239	1.08613	1.51412	1.67786	0	0	0	1.14459
CRPG499	LOC_Os11g34060	retrotransposon, putative, centromere-specific, expressed	3.92094	1.34406	0.608181	0.807579	3.86505	3.23977	0	0.399383
CRPG500	LOC_Os11g39090	expressed protein	3.92055	0.507139	1.55485	0	0	0	0	0
CRPG501	LOC_Os03g53350	anthocyanin 3-O-beta-glucosyltransferase, putative, expressed	3.91057	1.49064	0	0.568601	6.48244	2.59835	5.65124	0.489794
CRPG502	LOC_Os09g18090	retrotransposon protein, putative, Ty3-gypsy subclass, expressed	3.90595	1.10781	2.27308	0	0	0	0	0
CRPG503	LOC_Os11g19840	O-methyltransferase, putative, expressed	3.891	0.210838	3.74791	0.353668	0.504696	0	1.51258	0
CRPG504	LOC_Os05g24530	retrotransposon protein, putative, Ty3-gypsy subclass, expressed	3.88974	2.23144	0	0	0	0	0.40523	0
CRPG505	LOC_Os06g11200	12-oxophytodienoate reductase, putative, expressed	3.88694	0.716174	2.42255	0.353668	1.1602	2.25621	0.817591	3.1215
CRPG506	LOC_Os02g16050	transposon protein, putative, unclassified, expressed	3.88643	0.94825	2.18583	0	0.898594	2.38494	2.66878	0.565887
CRPG507	LOC_Os05g30890	cytochrome P450, putative, expressed	3.88632	1.772	1.92024	4.35781	3.32298	0	4.23628	0.399383
CRPG508	LOC_Os10g35660	MYB family transcription factor, putative, expressed	3.88341	1.87573	2.13441	1.43939	0	3.29767	1.69657	0.711837
CRPG509	LOC_Os04g45510	expressed protein	3.87967	0.375028	1.06435	1.79798	1.18414	0	3.10516	4.85829
CRPG510	LOC_Os10g34260	expressed protein	3.87132	1.77093	2.05403	1.70551	2.40883	3.93877	3.46152	2.02065
CRPG511	LOC_Os09g38610	ZOS9-18 - C2H2 zinc finger protein, expressed	3.85596	0.210838	0.608181	0.353668	0.860807	0	6.11557	0.399383
CRPG512	LOC_Os01g58310	expressed protein	3.85539	2.40166	1.11723	1.89899	6.476	0	0.40523	4.59236
CRPG513	LOC_Os02g51050	Leucine rich repeat N-terminal domain containing protein, putative, expressed	3.84637	1.53824	2.742	2.96091	0.531493	0	5.09941	3.83129
CRPG514	LOC_Os09g12390	expressed protein	3.83086	1.62436	1.31718	1.32583	3.82889	0	2.66272	4.91497
CRPG515	LOC_Os03g13290	expressed protein	3.82672	1.54266	2.80992	2.35872	0	0	3.04263	2.36927
CRPG516	LOC_Os04g11962	expressed protein	3.8257	1.2643	0	0	1.8256	0	0	0.399383
CRPG517	LOC_Os05g12330	uncharacterized protein KIAA1310, putative, expressed	3.81745	1.70864	0.85406	1.20532	0.860807	0	2.39474	0.565887
CRPG518	LOC_Os03g24260	retrotransposon protein, putative, unclassified, expressed	3.81418	1.34309	0	0	3.52239	0	0	0
CRPG519	LOC_Os06g17920	NBS-LRR disease resistance protein, putative, expressed	3.80638	1.92015	0	0.568601	1.44239	0	1.10737	0
CRPG520	LOC_Os12g37080	expressed protein	3.79521	0.620086	0.608181	0	0	0	0	0
CRPG521	LOC_Os02g37790	retrotransposon protein, putative, unclassified, expressed	3.7664	0.802671	3.48677	0	0	0	0	0
CRPG522	LOC_Os04g22110	retrotransposon protein, putative, unclassified, expressed	3.75626	0.374407	0	0.568601	4.32338	2.38494	7.79746	0
CRPG523	LOC_Os11g28920	expressed protein	3.73017	0.375028	2.22558	0.353668	4.2547	4.15655	1.20237	1.03008
CRPG524	LOC_Os09g37500	OsSAUR55 - Auxin-responsive SAUR gene family member, expressed	3.72876	0.802671	5.17044	1.15921	3.26692	2.38494	3.38784	1.42821
CRPG525	LOC_Os02g16995	expressed protein	3.72139	0.210838	1.0909	0	0	0	1.10737	0.971291
CRPG526	LOC_Os03g21260	2,3-bisphosphoglycerate-independent phosphoglycerate mutase, putative, expressed	3.71044	2.01412	2.67134	2.39267	0.504696	2.25621	2.85405	2.92521
CRPG527	LOC_Os04g01950	legume lectins beta domain containing protein, putative, expressed	3.7024	1.29855	2.85086	4.48376	0	0	1.02904	2.7442
CRPG528	LOC_Os07g04000	lectin-like receptor kinase, putative, expressed	3.69528	1.33955	0	0	0	0	2.53875	1.82998
CRPG529	LOC_Os08g43700	OsSAUR36 - Auxin-responsive SAUR gene family member, expressed	3.68107	0.374407	4.54605	0	2.87786	3.47403	1.53788	0
CRPG530	LOC_Os08g43200	dehydration-responsive element-binding protein, putative, expressed	3.67892	1.28287	0.403249	1.87311	0.493675	2.38494	4.71053	2.15766
CRPG531	LOC_Os09g39630	conserved hypothetical protein	3.67219	1.26285	1.19703	2.87705	0.877861	2.25621	0	2.22962
CRPG532	LOC_Os07g02920	DUF538 domain containing protein, putative, expressed	3.67053	1.40284	1.63257	0.964334	0.493675	0	1.06127	4.43494
CRPG533	LOC_Os02g15920	expressed protein	3.6701	2.72183	1.34129	3.06998	2.12975	4.28971	3.20059	3.84719
CRPG534	LOC_Os07g37045	expressed protein	3.66985	1.01145	1.19703	0	2.27924	0	1.6759	2.81206
CRPG535	LOC_Os07g28570	leucine rich repeat protein, putative, expressed	3.66729	0.826817	1.19703	0	4.28853	2.25621	3.38844	0
CRPG536	LOC_Os02g18530	expressed protein	3.66372	2.22878	0.718058	1.32224	1.63186	0	1.59972	1.99205
CRPG537	LOC_Os08g27740	transposon protein, putative, unclassified, expressed	3.63695	1.91176	0	0.807579	1.1602	3.09671	2.09512	2.27842
CRPG538	LOC_Os01g49390	IPP transferase, putative, expressed	3.63168	1.87748	2.05403	2.52231	5.05517	0	0.40523	2.51914
CRPG539	LOC_Os07g11790	terpene synthase, putative, expressed	3.62411	0	2.40026	0	0	0	4.50234	0
CRPG540	LOC_Os08g08084	expressed protein	3.61621	2.29788	1.79274	4.28269	2.27775	2.25621	3.30212	4.10722
CRPG541	LOC_Os08g09020	Cupin domain containing protein, expressed	3.60552	1.2404	1.75728	4.38941	0.919033	0	0.40523	0.399383
CRPG542	LOC_Os05g33830	zinc finger, C3HC4 type domain containing protein, expressed	3.60311	0.507656	1.0909	2.05182	2.40295	0	0.40523	0.847389
CRPG543	LOC_Os12g25870	O-methyltransferase, putative, expressed	3.5985	0	0	0	0.493675	0	0	0
CRPG544	LOC_Os07g44930	dirigent, putative, expressed	3.59823	1.2404	1.6129	3.02943	2.01549	0	1.26967	3.12366
CRPG545	LOC_Os06g10030	expressed protein	3.59705	1.82323	0.885043	1.70826	2.41312	0	2.57147	1.51128
CRPG546	LOC_Os01g52514	B3 DNA binding domain containing protein, expressed	3.59557	1.79614	3.06797	2.39388	1.85142	0	5.54967	1.73592
CRPG547	LOC_Os11g45600	rust resistance protein Rp1-dp8, putative, expressed	3.59555	1.12334	0	0	1.69025	0	0	0
CRPG548	LOC_Os02g15500	plant protein of unknown function domain containing protein, expressed	3.58265	0.849985	0.403249	2.8169	0	0	1.36702	0.489794
CRPG549	LOC_Os03g63810	WRKY80, expressed	3.58157	1.30588	5.74118	0	2.86211	0	0	0
CRPG550	LOC_Os05g44960	expressed protein	3.574	1.34276	0.403249	0	0.890214	2.25621	0	1.42224
CRPG551	LOC_Os10g04560	hypothetical protein	3.55685	0.716174	0.608181	2.84718	0	0	0	0
CRPG552	LOC_Os11g45620	rust-resistance protein Lr21, putative, expressed	3.5556	1.06909	0.403249	2.82576	1.65642	4.28971	1.45382	1.38581
CRPG553	LOC_Os07g05350	expressed protein	3.55265	0.802671	2.52802	1.15921	0	0	2.3862	3.06796
CRPG554	LOC_Os04g35250	MONOCULM 1, putative, expressed	3.54574	0.717719	1.03469	4.39536	0.504696	2.25621	0	2.69093
CRPG555	LOC_Os04g56000	AGAP001055-PA, putative, expressed	3.54331	1.17235	2.21141	4.13205	0	0	1.39257	1.42427
CRPG556	LOC_Os10g02960	retrotransposon protein, putative, Ty1-copia subclass, expressed	3.5415	1.06933	0.403249	0.558235	0.898594	0	0	0
CRPG557	LOC_Os01g28970	retrotransposon protein, putative, Ty3-gypsy subclass, expressed	3.53693	0.373786	2.8754	0.637481	1.18414	4.6661	7.25605	1.29065
CRPG558	LOC_Os07g15970	erythronate-4-phosphate dehydrogenase domain containing protein, expressed	3.53522	1.21902	1.53546	2.23459	0	0	1.06127	0
CRPG559	LOC_Os11g19850	expressed protein	3.51271	0.373786	2.02436	0	0	0	0.40523	0
CRPG560	LOC_Os03g49160	expressed protein	3.5119	2.25618	2.18688	2.8741	4.8868	3.23977	2.8883	1.98802
CRPG561	LOC_Os04g34030	U-box domain-containing protein, putative, expressed	3.50994	1.86215	1.03469	5.34357	0	0	0	2.1529
CRPG562	LOC_Os05g36900	dof zinc finger domain containing protein, putative, expressed	3.49877	1.33139	4.87484	2.17025	8.13838	0	3.96928	1.54833
CRPG563	LOC_Os10g23240	expressed protein	3.49566	1.48172	3.31687	1.32583	0.504696	0	0	2.01541
CRPG564	LOC_Os10g36626	expressed protein	3.48278	1.17743	3.6446	3.26474	1.8212	0	3.99383	4.42799
CRPG565	LOC_Os02g50090	retrotransposon protein, putative, unclassified, expressed	3.47331	2.01744	0.608181	1.67588	2.75838	2.38494	1.02904	1.03008
CRPG566	LOC_Os05g14260	peroxidase precursor, putative, expressed	3.46983	0.736597	2.97429	0.558235	0	0	3.31303	0
CRPG567	LOC_Os06g32860	zinc finger C-x8-C-x5-C-x3-H type family protein, expressed	3.46443	0.508172	2.36707	3.83328	0.877861	0	2.78821	4.54925
CRPG568	LOC_Os05g05510	expressed protein	3.46252	1.6187	1.51412	3.3374	2.97651	4.76091	0.721241	1.7391
CRPG569	LOC_Os01g57530	expressed protein	3.45804	1.06885	2.16086	1.67306	2.25835	4.48825	2.04861	0.711837
CRPG570	LOC_Os09g27550	expressed protein	3.45784	1.79672	2.08104	2.05182	0.531493	3.29767	1.90068	3.53781
CRPG571	LOC_Os03g56140	homeobox protein rough sheath 1, putative, expressed	3.45172	0.441074	2.0676	1.16606	1.16715	0	1.64498	0.399383
CRPG572	LOC_Os09g22480	hypothetical protein	3.4484	2.27479	1.42956	3.13039	3.81856	4.40765	2.37232	0.565887
CRPG573	LOC_Os05g43510	decarboxylase, putative, expressed	3.44526	0.211616	2.00939	3.58127	0.531493	3.23977	0.897632	1.89401
CRPG574	LOC_Os01g54515	peptide transporter PTR2, putative, expressed	3.43943	1.62943	1.22152	2.04966	3.10733	5.11798	1.98465	1.95876
CRPG575	LOC_Os08g35500	expressed protein	3.43919	2.11892	1.96652	1.61672	2.13685	3.8962	3.95013	2.59986
CRPG576	LOC_Os03g04210	IQ calmodulin-binding motif family protein, putative, expressed	3.43726	0.619644	1.19703	5.68496	1.64188	3.29767	1.33624	1.50659
CRPG577	LOC_Os03g16450	pentatricopeptide, putative, expressed	3.4343	1.94018	2.61578	2.96501	1.80585	2.38494	2.6615	4.28257
CRPG578	LOC_Os08g15000	pentatricopeptide repeat domain containing protein, putative, expressed	3.4332	2.49296	1.79176	1.79798	1.98097	2.38494	2.64771	4.84791
CRPG579	LOC_Os04g19750	OsFBL11 - F-box domain and LRR containing protein, expressed	3.43024	0.620086	1.97978	3.22381	3.90801	0	1.20237	2.3489
CRPG580	LOC_Os09g02000	expressed protein	3.42612	0.441074	1.85782	4.18488	3.00979	0	2.92537	2.61612
CRPG581	LOC_Os06g25470	expressed protein	3.4213	1.62397	1.63257	2.12299	2.79771	0	2.94683	4.15922
CRPG582	LOC_Os01g56750	OsFBDUF8 - F-box and DUF domain containing protein, expressed	3.41847	1.43518	1.40839	1.57707	2.61878	0	0	1.7351
CRPG583	LOC_Os04g25960	expressed protein	3.3984	0.802671	1.06435	0.568601	0.493675	0	1.02904	2.07252
CRPG584	LOC_Os01g44180	expressed protein	3.39747	1.67977	1.61264	1.53939	0.493675	0	2.08778	4.08252
CRPG585	LOC_Os09g17940	expressed protein	3.39607	0.507656	2.35617	0.967576	2.51835	0	4.36791	4.52332
CRPG586	LOC_Os03g62539	expressed protein	3.39144	2.82938	2.78488	3.79941	2.26485	0	3.99408	4.28216
CRPG587	LOC_Os02g56830	transposon protein, putative, CACTA, En/Spm sub-class, expressed	3.37947	1.21941	1.06435	2.03007	3.62944	0	2.21382	1.28741
CRPG588	LOC_Os01g04530	expressed protein	3.37833	2.21154	2.47587	1.54157	1.41657	0	0	4.9961
CRPG589	LOC_Os04g38360	wound/stress protein, putative, expressed	3.37572	2.28409	2.2612	3.03845	0	0	1.02904	0.85327
CRPG590	LOC_Os05g43590	serpin domain containing protein, putative, expressed	3.37534	1.88176	1.31718	1.28348	1.44811	0	1.83414	1.69849
CRPG591	LOC_Os04g34970	AP2 domain containing protein, expressed	3.36877	1.42159	3.24452	3.87318	0.493675	3.29767	1.95973	3.02912
CRPG592	LOC_Os03g42370	B3 DNA binding domain containing protein, expressed	3.3625	1.39127	2.06646	1.43373	0.504696	0	3.14906	1.90044
CRPG593	LOC_Os01g52770	GDSL-like lipase/acylhydrolase, putative, expressed	3.3556	0	8.27803	0	3.18939	0	4.86807	1.19339
CRPG594	LOC_Os02g44840	expressed protein	3.35437	2.10689	2.10729	2.31298	2.87574	2.25621	4.34806	2.12801
CRPG595	LOC_Os11g04700	expressed protein	3.35347	1.55457	1.90521	0.967576	1.8212	0	1.81537	1.37558
CRPG596	LOC_Os01g60690	expressed protein	3.33424	1.29973	1.4725	0.816305	1.44239	0	0	1.08283
CRPG597	LOC_Os05g49960	expressed protein	3.32353	1.67199	1.06435	1.79174	0	0	1.02904	1.08283
CRPG598	LOC_Os12g08050	nodulation receptor kinase precursor, putative, expressed	3.32289	1.86154	2.10853	3.86753	1.63688	0	2.58688	2.98014
CRPG599	LOC_Os06g35990	expressed protein	3.32087	0.374407	0	0	0	0	0	0
CRPG600	LOC_Os01g28960	retrotransposon protein, putative, Ty3-gypsy subclass, expressed	3.3173	0.373786	2.24946	0	0	0	7.18121	0.489794
CRPG601	LOC_Os09g26290	amino acid transporter family protein, putative, expressed	3.31473	0.911443	3.17597	4.30015	3.25805	0	3.68022	1.83373
CRPG602	LOC_Os03g48960	expressed protein	3.30699	1.88606	0.97834	2.14479	0	0	2.10927	4.2215
CRPG603	LOC_Os04g27680	retrotransposon protein, putative, Ty3-gypsy subclass, expressed	3.29954	0.373786	0	0	0.504696	0	0	0
CRPG604	LOC_Os07g19160	expressed protein	3.2886	0.210838	0	0	1.67831	2.38494	0	0
CRPG605	LOC_Os01g06730	verticillium wilt disease resistance protein, putative, expressed	3.28613	1.10843	3.01213	0.353668	4.1773	0	2.94508	4.7756
CRPG606	LOC_Os01g58930	hypothetical protein	3.28577	0.373786	0	0	1.99247	0	0.779358	3.69647
CRPG607	LOC_Os01g18450	expressed protein	3.2855	0	3.2989	4.70641	4.41046	0	0	1.19339
CRPG608	LOC_Os04g42240	expressed protein	3.28519	0.715788	1.57513	1.53939	1.22421	0	0	1.66007
CRPG609	LOC_Os06g50724	START domain containing protein, expressed	3.28457	1.2196	0.403249	0.568601	3.21647	5.12912	1.28258	0
CRPG610	LOC_Os11g01842	SAG20, putative, expressed	3.28413	1.52471	0.570558	0.967576	0.504696	0	0.779358	0.489794
CRPG611	LOC_Os01g58960	cytochrome P450, putative, expressed	3.27765	1.16631	0.403249	4.47018	5.15797	0	0.983216	2.79749
CRPG612	LOC_Os12g02550	expressed protein	3.27624	1.66474	5.32618	3.049	0.890214	0	4.09095	2.01609
CRPG613	LOC_Os10g41620	retrotransposon protein, putative, unclassified, expressed	3.26033	1.19663	2.43297	0	3.70603	3.67558	2.20484	6.72453
CRPG614	LOC_Os02g26280	retrotransposon protein, putative, unclassified, expressed	3.24119	1.22536	0.718058	0.964334	0	0	0.779358	0.399383
CRPG615	LOC_Os09g24810	ZF-HD protein dimerisation region containing protein, expressed	3.23277	1.45073	5.99387	0	0.877861	0	2.26643	3.44335
CRPG616	LOC_Os11g03610	OsFBX394 - F-box domain containing protein, expressed	3.22736	1.66985	0.718058	1.48521	4.39277	3.17002	3.64274	2.74542
CRPG617	LOC_Os11g19340	lipase, putative, expressed	3.21139	1.08388	0.885043	1.15921	1.97305	2.59835	0	0.565887
CRPG618	LOC_Os01g33360	DnaK family protein, putative, expressed	3.21127	0.479513	0	0.353668	0	0	0.524226	2.92624
CRPG619	LOC_Os07g39210	expressed protein	3.20474	0.69398	1.5738	1.54465	2.14555	3.81317	0	2.53994
CRPG620	LOC_Os12g18560	invertase/pectin methylesterase inhibitor family protein, putative, expressed	3.19999	1.06338	1.84101	1.90309	0.531493	0	0.897632	5.47965
CRPG621	LOC_Os12g18780	expressed protein	3.19019	0	1.99506	0.964334	0.531493	0	0.621718	0.85327
CRPG622	LOC_Os10g34960	ubiquitin family protein, putative, expressed	3.18927	1.96491	2.48591	3.97556	5.44419	0	3.3624	3.47353
CRPG623	LOC_Os01g37200	retrotransposon protein, putative, Ty3-gypsy subclass, expressed	3.17992	0.619202	1.7916	0.568601	0.531493	4.12491	0.721241	0.854785
CRPG624	LOC_Os11g03190	expressed protein	3.17655	1.91946	2.40037	1.07808	2.16973	0	2.54892	0.489794
CRPG625	LOC_Os06g42205	expressed protein	3.17323	2.54642	3.53822	3.90999	4.67326	0	3.10896	3.2016
CRPG626	LOC_Os02g53590	DEFL71 - Defensin and Defensin-like DEFL family, expressed	3.14857	0.211616	1.06435	0	1.22421	0	2.39365	0.565887
CRPG627	LOC_Os08g19680	expressed protein	3.14348	1.6107	1.68764	0.558235	0	0	1.02904	3.74215
CRPG628	LOC_Os08g09770	DnaK family protein, putative, expressed	3.14231	0	0	0.975388	0.898594	2.38494	1.02904	0.914214
CRPG629	LOC_Os11g43790	DUF581 domain containing protein, expressed	3.11432	0.375028	1.66845	0.874534	0.890214	0	1.02904	7.39224
CRPG630	LOC_Os02g01825	retrotransposon protein, putative, unclassified, expressed	3.11347	0.94814	1.93497	1.90478	3.39996	0	2.90093	1.8367
CRPG631	LOC_Os12g31890	ureide permease, putative, expressed	3.11063	0.736597	1.00679	4.77982	1.81474	4.51663	1.90068	5.092
CRPG632	LOC_Os05g38300	expressed protein	3.10692	0.211616	1.96652	0	0.890214	2.25621	0	0
CRPG633	LOC_Os06g07590	inactive receptor kinase At2g26730 precursor, putative, expressed	3.10445	1.94169	2.19926	1.53411	2.50067	2.38494	0.40523	0.399383
CRPG634	LOC_Os10g39340	aspartic proteinase nepenthesin precursor, putative, expressed	3.09332	0	0	0	0	0	0	0
CRPG635	LOC_Os06g32610	expressed protein	3.08939	0.716947	0	0	0.493675	4.71266	2.17924	3.84925
CRPG636	LOC_Os05g05900	retrotransposon protein, putative, Ty3-gypsy subclass, expressed	3.0805	0.947409	0.608181	2.10438	4.26434	3.29767	2.59696	0.785081
CRPG637	LOC_Os02g26380	expressed protein	3.07706	2.33968	2.57698	2.35102	0.877861	2.59835	1.02904	4.04457
CRPG638	LOC_Os06g27860	poor homologous synapsis 1 protein, putative, expressed	3.07634	1.57686	0.885043	1.27717	3.56556	2.59835	3.8878	2.76048
CRPG639	LOC_Os09g32120	expressed protein	3.06739	0.715788	1.27125	0.568601	2.51835	3.77291	3.26577	3.33482
CRPG640	LOC_Os09g12670	transposon protein, putative, unclassified	3.05291	1.2815	0	0	0	0	0.721241	0
CRPG641	LOC_Os05g24710	retrotransposon protein, putative, Ty1-copia subclass, expressed	3.04814	1.6727	0.718058	1.15638	0.919033	2.25621	0.40523	0.399383
CRPG642	LOC_Os08g03825	expressed protein	3.0451	1.41675	1.84228	2.33818	2.61878	0	4.98939	4.95244
CRPG643	LOC_Os10g12400	nodulin, putative, expressed	3.0435	0.210838	1.59269	0	0	0	6.75146	1.59332
CRPG644	LOC_Os11g06730	ECAGL2 - ECA1 gametogenesis related family protein precursor, expressed	3.03949	0.801985	6.31414	0.568601	0	0	1.30966	0
CRPG645	LOC_Os02g49180	RNA polymerase subunit, putative, expressed	3.03777	0.85392	1.67014	1.93246	3.36734	2.25621	3.9703	3.08192
CRPG646	LOC_Os02g42390	expressed protein	3.03485	0.983172	2.01052	0	0.531493	0	0	0.489794
CRPG647	LOC_Os01g60520	WRKY116, expressed	3.03273	0.507139	1.27125	0.874534	0	0	0	0.785081
CRPG648	LOC_Os05g12030	expressed protein	3.03226	0.508172	0	1.21195	0	0	1.12915	0
CRPG649	LOC_Os06g38490	retrotransposon protein, putative, unclassified, expressed	3.03022	2.23792	1.55466	2.69939	0.504696	0	1.8026	5.42616
CRPG650	LOC_Os01g13950	OsGrx_A1 - glutaredoxin subgroup III, expressed	3.02776	1.51474	0.885043	1.47746	3.50444	3.36165	5.01537	3.28578
CRPG651	LOC_Os12g31130	retrotransposon protein, putative, unclassified, expressed	3.02282	0	0.718058	0	1.64917	3.81317	0	2.90714
CRPG652	LOC_Os01g19880	expressed protein	3.01811	1.10843	2.64398	2.40674	0.504696	0	0.40523	1.19458
CRPG653	LOC_Os05g39880	expressed protein	3.01637	0.620086	3.2441	0.807579	1.98673	0	1.91838	0
CRPG654	LOC_Os09g06530	expressed protein	3.0146	0.910411	2.36615	1.21195	1.98279	3.09671	1.48222	1.19458
CRPG655	LOC_Os07g47010	transposon protein, putative, unclassified, expressed	3.01211	0.507139	1.51412	0	0.919033	2.25621	4.62235	0.785081
CRPG656	LOC_Os01g02680	protein kinase domain containing protein, expressed	3.01051	0.661756	0.608181	0	0	0	0.621718	0
CRPG657	LOC_Os09g07290	GDSL-like lipase/acylhydrolase, putative, expressed	3.0103	1.54931	3.78209	1.66909	0	4.54447	0	1.38174

## Sheet: Table S2
Table S2. Summary of enriched GO terms for 657 CRPGs.
GO ID	GO Name	GO Level	Ref Total	Ref Number	Query Total	Query Number	Query Exp	Hyper p value	Fold Change
GO:0031408	oxylipin biosynthetic process	6	39571	17	510	3	0.2191	0.0012	13.6924
GO:0050896	response to stimulus	2	39571	43	510	5	0.5542	0.0002	9.02201
GO:0006808	regulation of nitrogen utilization	3, 4	39571	30	510	3	0.3866	0.0061	7.75996
GO:0006633	fatty acid biosynthetic process	6	39571	139	510	9	1.7915	0.0001	5.02372
GO:0008610	lipid biosynthetic process	4	39571	50	510	3	0.6444	0.0227	4.65549
GO:0006694	steroid biosynthetic process	6	39571	69	510	4	0.8893	0.0102	4.49792
GO:0009734	auxin mediated signaling pathway	5, 6	39571	107	510	6	1.379	0.0022	4.35098
GO:0030001	metal ion transport	6, 7	39571	129	510	7	1.6626	0.0012	4.21027
GO:0043086	negative regulation of catalytic activity	5	39571	57	510	3	0.7346	0.031	4.08386
GO:0016567	protein ubiquitination	8	39571	113	510	5	1.4564	0.0122	3.43312
GO:0006629	lipid metabolic process	4	39571	280	510	11	3.6087	0.0008	3.04819
GO:0006350	transcription		39571	760	510	28	9.7951	0	2.85857
GO:0045449	regulation of transcription		39571	1392	510	49	17.9404	0	2.73127
GO:0006950	response to stress	3	39571	204	510	7	2.6292	0.0119	2.66241
GO:0006915	apoptosis	5	39571	532	510	15	6.8565	0.0025	2.18771

## Sheet: Table S3
Table S3. Summary of functional classification of 657 CRPGs using MapMan analysis.
Identifier	Bincode	Name	Description	Type
LOC_Os01g02530.1	27.2	RNA.transcription	very weakly similar to (84.7) RRPO_OENBE RNA-directed DNA polymerase homolog (Reverse transcriptase homolog) - Oenothera bertiana (Berteros evening primrose)RT_LTR rve RVT_1 PRK07238 protein|retrotransposon protein, putative, unclassified, expressed	T
LOC_Os01g02680.1	29.4	protein.postranslational modification	moderately similar to ( 309) AT1G67000 | Symbols: | ATP binding / kinase/ protein kinase/ protein serine/threonine kinase | chr1:25004217-25007604 REVERSEweakly similar to ( 184) KPRO_MAIZE Putative receptor protein kinase ZmPK1 precursor (EC 2.7.11.1) - Zea mays (Maize) TyrKc Pkinase_Tyr S_TKc Pkinase PTKc S_TKc PTKc_Src_like PTKc_Srm_Brk PTKc_EphR PTKc_Jak_rpt2 PTKc_Syk_like PTKc_Abl SPS1 PTKc_…	T
LOC_Os01g02830.1	30.2.24	signalling.receptor kinases.S-locus glycoprotein like	moderately similar to ( 304) AT1G66910 | Symbols: | protein kinase, putative | chr1:24961634-24963941 REVERSEweakly similar to ( 183) KPRO_MAIZE Putative receptor protein kinase ZmPK1 precursor (EC 2.7.11.1) - Zea mays (Maize) TyrKc Pkinase_Tyr Pkinase PTKc S_TKc S_TKc PTKc_EphR PTKc_Src_like PTKc_Syk_like PTKc_Srm_Brk PTKc_Abl PTKc_Jak_rpt2 PTKc_Tec_like PTKc_EphR_A2 PTKc_Csk_like PTKc_EGFR_like…	T
LOC_Os01g03130.1	35.2	not assigned.unknown	protein|expressed protein	T
LOC_Os01g04530.1	35.2	not assigned.unknown	protein|expressed protein	T
LOC_Os01g05170.1	35.2	not assigned.unknown	protein|expressed protein	T
LOC_Os01g05480.1	27.3.27	RNA.regulation of transcription.NAC domain transcription factor family	moderately similar to ( 270) AT2G39690 | Symbols: | unknown protein | chr2:16541489-16543267 FORWARDDUF547 protein|expressed protein	T
LOC_Os01g05480.2	27.3.27	RNA.regulation of transcription.NAC domain transcription factor family	moderately similar to ( 261) AT2G39690 | Symbols: | unknown protein | chr2:16541489-16543267 FORWARDDUF547 protein|expressed protein	T
LOC_Os01g05480.3	27.3.27	RNA.regulation of transcription.NAC domain transcription factor family	moderately similar to ( 270) AT2G39690 | Symbols: | unknown protein | chr2:16541489-16543267 FORWARDDUF547 protein|expressed protein	T
LOC_Os01g05760.1	35.2	not assigned.unknown	protein|PAS2, putative, expressed	T
LOC_Os01g05770.1	35.2	not assigned.unknown	protein|expressed protein	T
LOC_Os01g05780.1	29.4	protein.postranslational modification	protein|expressed protein	T
LOC_Os01g05870.1	30.2.99	signalling.receptor kinases.misc	highly similar to ( 676) AT3G47570 | Symbols: | leucine-rich repeat transmembrane protein kinase, putative | chr3:17527611-17530748 FORWARDmoderately similar to ( 405) RPK1_IPONI Receptor-like protein kinase precursor (EC 2.7.11.1) - Ipomoea nil (Japanese morning glory) (Pharbitis nil) Pkinase S_TKc S_TKc Pkinase_Tyr TyrKc PTKc PTKc_Jak_rpt2 PTKc_Src_like PTKc_Srm_Brk PTKc_Csk_like SPS1 PTKc_Frk_…	T
LOC_Os01g06730.1	20.1.7	stress.biotic.PR-proteins	moderately similar to ( 342) AT1G45616 | Symbols: AtRLP6 | AtRLP6 (Receptor Like Protein 6); protein binding | chr1:17183550-17186534 REVERSEweakly similar to ( 167) RPK1_IPONI Receptor-like protein kinase precursor (EC 2.7.11.1) - Ipomoea nil (Japanese morning glory) (Pharbitis nil) protein|verticillium wilt disease resistance protein, putative, expressed	T
LOC_Os01g06890.1	20.1.7	stress.biotic.PR-proteins	moderately similar to ( 315) AT2G33060 | Symbols: AtRLP27 | AtRLP27 (Receptor Like Protein 27); kinase/ protein binding | chr2:14025661-14028087 FORWARDweakly similar to ( 166) PSKR_DAUCA Phytosulfokine receptor precursor (EC 2.7.11.1) (Phytosulfokine LRR receptor kinase) - Daucus carota (Carrot) protein|leucine-rich repeat family protein, putative, expressed	T
LOC_Os01g09660.1	35.2	not assigned.unknown	protein|expressed protein	T
LOC_Os01g10640.1	35.2	not assigned.unknown	protein|expressed protein	T
LOC_Os01g11660.1	26.28	misc.GDSL-motif lipase	moderately similar to ( 282) AT1G28590 | Symbols: | lipase, putative | chr1:10047509-10049300 REVERSEweakly similar to ( 160) EST_HEVBR Esterase precursor (EC 3.1.1.-) (Early nodule-specific protein homolog) (Latex allergen Hev b 13) - Hevea brasiliensis (Para rubber tree)SGNH_plant_lipase_like fatty_acyltransferase_like COG3240 protein|GDSL-like lipase/acylhydrolase, putative, expressed	T
LOC_Os01g13950.1	21.4	redox.glutaredoxins	GRX_GRXh_1_2_like protein|OsGrx_A1 - glutaredoxin subgroup III, expressed	T
LOC_Os01g14630.1	16.1.1.10	secondary metabolism.isoprenoids.non-mevalonate pathway.geranylgeranyl pyrophosphate synthase	moderately similar to ( 276) AT4G36810 | Symbols: GGPS1 | GGPS1 (GERANYLGERANYL PYROPHOSPHATE SYNTHASE 1); farnesyltranstransferase | chr4:17343513-17344628 FORWARDmoderately similar to ( 280) GGPPS_HEVBR Geranylgeranyl pyrophosphate synthetase, chloroplast precursor (GGPP synthetase) [Includes: Dimethylallyltranstransferase (EC 2.5.1.1); Geranyltranstransferase (EC 2.5.1.10); Farnesyltranstransf…	T
LOC_Os01g16380.1	35.2	not assigned.unknown	protein|expressed protein	T
LOC_Os01g16660.1	30.11	signalling.light	moderately similar to ( 278) AT4G38180 | Symbols: FRS5 | FRS5 (FAR1-related sequence 5); zinc ion binding | chr4:17906702-17909404 REVERSE protein|transposon protein, putative, unclassified, expressed	T
LOC_Os01g18090.1	35.2	not assigned.unknown	protein|expressed protein	T
LOC_Os01g18110.1	26.11.1	misc.alcohol dehydrogenases	moderately similar to ( 326) AT1G80820 | Symbols: CCR2, ATCCR2 | CCR2 (CINNAMOYL COA REDUCTASE); cinnamoyl-CoA reductase | chr1:30370646-30372460 FORWARDweakly similar to ( 168) DFRA_DIACA Dihydroflavonol-4-reductase (EC 1.1.1.219) (DFR) (Dihydrokaempferol 4-reductase) - Dianthus caryophyllus (Carnation) (Clove pink) WcaG Epimerase protein|cinnamoyl CoA reductase, putative, expressed	T
LOC_Os01g18120.1	26.11.1	misc.alcohol dehydrogenases	moderately similar to ( 335) AT1G80820 | Symbols: CCR2, ATCCR2 | CCR2 (CINNAMOYL COA REDUCTASE); cinnamoyl-CoA reductase | chr1:30370646-30372460 FORWARDweakly similar to ( 167) DFRA_HORVU Dihydroflavonol-4-reductase (EC 1.1.1.219) (DFR) (Dihydrokaempferol 4-reductase) - Hordeum vulgare (Barley) WcaG Epimerase 3Beta_HSD protein|cinnamoyl CoA reductase, putative, expressed	T
LOC_Os01g18450.1	35.2	not assigned.unknown	protein|expressed protein	T
LOC_Os01g19170.1	10.6.3	cell wall.degradation.pectate lyases and polygalacturonases	moderately similar to ( 479) AT1G02460 | Symbols: | glycoside hydrolase family 28 protein / polygalacturonase (pectinase) family protein | chr1:504897-507099 REVERSEmoderately similar to ( 257) PGLR_ACTCH Polygalacturonase precursor (EC 3.2.1.15) (PG) (Pectinase) - Actinidia chinensis (Kiwi) (Yangtao)Glyco_hydro_28 PGU1 protein|polygalacturonase, putative, expressed	T
LOC_Os01g19880.1	35.2	not assigned.unknown	protein|expressed protein	T
LOC_Os01g20206.1	33.99	development.unspecified	moderately similar to ( 281) AT2G41380 | Symbols: | embryo-abundant protein-related | chr2:17251981-17252886 FORWARD protein|methyltransferase, putative, expressed	T
LOC_Os01g23070.1	35.2	not assigned.unknown	protein|expressed protein	T
LOC_Os01g23430.1	35.2	not assigned.unknown	protein|transposon protein, putative, unclassified, expressed	T
LOC_Os01g24920.1	29.4	protein.postranslational modification	moderately similar to ( 315) AT4G02390 | Symbols: APP, PARP1, ATPARP1 | APP (ARABIDOPSIS POLY(ADP-RIBOSE) POLYMERASE); NAD+ ADP-ribosyltransferase/ nucleic acid binding | chr4:1050104-1053960 FORWARDhighly similar to ( 715) PRP2B_ORYSA Poly [ADP-ribose] polymerase 2-B (EC 2.4.2.30) (PARP-2-B) (ADPRT 2-B) (NAD(+) ADP-ribosyltransferase 2-B) (Poly[ADP-ribose] synthetase 2-B) - Oryza sativa (Rice) p…	T
LOC_Os01g25500.1	11.8	lipid metabolism.exotics (steroids, squalene etc)	very weakly similar to (96.3) AT5G42890 | Symbols: ATSCP2, SCP2 | SCP2 (STEROL CARRIER PROTEIN 2); oxidoreductase/ sterol carrier | chr5:17194458-17195910 REVERSE protein|sterol carrier protein-2, putative, expressed	T
LOC_Os01g26280.1	30.2.99	signalling.receptor kinases.misc	moderately similar to ( 363) AT1G21230 | Symbols: WAK5 | WAK5 (WALL ASSOCIATED KINASE 5); kinase/ protein serine/threonine kinase | chr1:7429980-7432346 FORWARDmoderately similar to ( 209) NORK_PEA Nodulation receptor kinase precursor (EC 2.7.11.1) - Pisum sativum (Garden pea) TyrKc Pkinase_Tyr S_TKc PTKc S_TKc Pkinase PTKc_Fes_like PTKc_Syk_like PTKc_Jak_rpt2 SPS1 PTKc_Csk_like PTKc_Abl PTKc_Src…	T
LOC_Os01g27340.1	26.9	misc.glutathione S transferases	weakly similar to ( 191) AT3G62760 | Symbols: ATGSTF13 | ATGSTF13; glutathione transferase | chr3:23217425-23218246 REVERSEmoderately similar to ( 355) GSTH1_ORYSA Probable glutathione S-transferase GSTF1 (EC 2.5.1.18) (GST-I) - Oryza sativa (Rice) GST_C_Phi GST_N_Phi Gst protein|glutathione S-transferase, putative, expressed	T
LOC_Os01g28134.1	35.2	not assigned.unknown	protein|expressed protein	T
LOC_Os01g28960.1	35.2	not assigned.unknown	protein|retrotransposon protein, putative, Ty3-gypsy subclass, expressed	T
LOC_Os01g28970.2	35.2	not assigned.unknown	protein|retrotransposon protein, putative, Ty3-gypsy subclass, expressed	T
LOC_Os01g29280.1	35.2	not assigned.unknown	weakly similar to ( 105) AT3G02430 | Symbols: | unknown protein | chr3:499360-500019 FORWARDDUF679 protein|expressed protein	T
LOC_Os01g33360.1	20.2.1	stress.abiotic.heat	highly similar to ( 503) AT5G28540 | Symbols: BIP1 | BIP1; ATP binding | chr5:10540665-10543274 REVERSEhighly similar to ( 504) BIP2_MAIZE Luminal-binding protein 2 precursor (BiP2) (Heat shock protein 70 homolog 2) (B70) (B-70) - Zea mays (Maize) HSP70 dnaK DnaK dnaK hscA hscA protein|DnaK family protein, putative, expressed	T
LOC_Os01g34560.1	11.1.10	lipid metabolism.FA synthesis and FA elongation.beta ketoacyl CoA synthase	moderately similar to ( 496) AT1G68530 | Symbols: CUT1, POP1, CER6, G2, KCS6 | KCS6 (3-KETOACYL-COA SYNTHASE 6); catalytic/ transferase, transferring acyl groups other than amino-acyl groups | chr1:25713600-25714733 REVERSEFAE1_CUT1_RppA CHS_like BcsA protein|3-ketoacyl-CoA synthase, putative, expressed	T
LOC_Os01g37200.1	35.2	not assigned.unknown	protein|retrotransposon protein, putative, Ty3-gypsy subclass, expressed	T
LOC_Os01g37460.1	30.5	signalling.G-proteins	weakly similar to ( 102) AT3G15680 | Symbols: | zinc finger (Ran-binding) family protein | chr3:5315437-5316048 FORWARD protein|zinc finger family protein, putative, expressed	T
LOC_Os01g39136.1	35.2	not assigned.unknown	protein|retrotransposon protein, putative, unclassified, expressed	T
LOC_Os01g40950.1	35.2	not assigned.unknown	protein|expressed protein	T
LOC_Os01g41420.1	34.3	transport.amino acids	moderately similar to ( 367) AT5G15240 | Symbols: | amino acid transporter family protein | chr5:4947762-4950211 FORWARD Aa_trans SdaC protein|transmembrane amino acid transporter protein, putative, expressed	T
LOC_Os01g41740.1	35.2	not assigned.unknown	protein|expressed protein	T
LOC_Os01g42190.1	20.2.1	stress.abiotic.heat	weakly similar to ( 120) AT1G71000 | Symbols: | heat shock protein binding | chr1:26769336-26770111 REVERSE DnaJ DnaJ protein|heat shock protein DnaJ, putative, expressed	T
LOC_Os01g43650.1	27.3.32	RNA.regulation of transcription.WRKY domain transcription factor family	weakly similar to ( 136) AT2G47260 | Symbols: WRKY23, ATWRKY23 | WRKY23; transcription factor | chr2:19405045-19406446 REVERSEWRKY protein|WRKY11, expressed	T
LOC_Os01g43650.2	27.3.32	RNA.regulation of transcription.WRKY domain transcription factor family	weakly similar to ( 136) AT2G47260 | Symbols: WRKY23, ATWRKY23 | WRKY23; transcription factor | chr2:19405045-19406446 REVERSEWRKY protein|WRKY11, expressed	T
LOC_Os01g43750.1	26.1	misc.cytochrome P450	highly similar to ( 546) AT3G14690 | Symbols: CYP72A15 | CYP72A15; electron carrier/ heme binding / iron ion binding / monooxygenase/ oxygen binding | chr3:4937410-4939310 FORWARDhighly similar to ( 523) C72A1_CATRO Cytochrome P450 72A1 (EC 1.3.3.9) (CYPLXXII) (Secologanin synthase) (SLS) - Catharanthus roseus (Rosy periwinkle) (Madagascar periwinkle) p450 CypX protein|cytochrome P450 72A1, putat…	T
LOC_Os01g44180.1	35.2	not assigned.unknown	protein|expressed protein	T
LOC_Os01g46440.1	35.2	not assigned.unknown	protein|VQ domain containing protein, putative, expressed	T
LOC_Os01g48290.1	27.3.8	RNA.regulation of transcription.C2C2(Zn) DOF zinc finger family	zf-Dof protein|dof zinc finger domain containing protein, putative, expressed	T
LOC_Os01g49320.1	20.1	stress.biotic	moderately similar to ( 258) AT5G24090 | Symbols: | acidic endochitinase (CHIB1) | chr5:8143805-8145153 REVERSEmoderately similar to ( 297) CHIA_CICAR Acidic endochitinase precursor (EC 3.2.1.14) - Cicer arietinum (Chickpea) (Garbanzo) Glyco_hydro_18 protein|glycosyl hydrolase, putative, expressed	T
LOC_Os01g49390.1	17.4.1	hormone metabolism.cytokinin.synthesis-degradation	weakly similar to ( 167) AT1G68460 | Symbols: ATIPT1 | ATIPT1 (isopentenyltransferase 1); adenylate dimethylallyltransferase | chr1:25668976-25670049 REVERSE MiaA miaA IPPT protein|IPP transferase, putative, expressed	T
LOC_Os01g49710.1	26.9	misc.glutathione S transferases	weakly similar to ( 145) AT1G10360 | Symbols: ATGSTU18, GST29 | ATGSTU18 (GLUTATHIONE S-TRANSFERASE TAU 18); glutathione transferase | chr1:3395738-3396806 REVERSEweakly similar to ( 148) GSTU6_ORYSA Probable glutathione S-transferase GSTU6 (EC 2.5.1.18) (28 kDa cold-induced protein) - Oryza sativa (Rice) GST_C_Tau GST_N_Tau Gst protein|glutathione S-transferase, putative, expressed	T
LOC_Os01g49720.1	26.9	misc.glutathione S transferases	moderately similar to ( 207) AT1G10360 | Symbols: ATGSTU18, GST29 | ATGSTU18 (GLUTATHIONE S-TRANSFERASE TAU 18); glutathione transferase | chr1:3395738-3396806 REVERSEmoderately similar to ( 235) GSTU6_ORYSA Probable glutathione S-transferase GSTU6 (EC 2.5.1.18) (28 kDa cold-induced protein) - Oryza sativa (Rice) GST_C_Tau GST_N_Tau Gst protein|glutathione S-transferase, putative, expressed	T
LOC_Os01g50720.1	27.3.25	RNA.regulation of transcription.MYB domain transcription factor family	moderately similar to ( 232) AT5G26660 | Symbols: ATMYB4, ATMYB86 | ATMYB86 (MYB DOMAIN PROTEIN 86); specific transcriptional repressor/ transcription repressor | chr5:9331775-9333044 REVERSEmoderately similar to ( 309) MYB3_HORVU Myb-related protein Hv33 - Hordeum vulgare (Barley) protein|MYB family transcription factor, putative, expressed	T
LOC_Os01g51790.1	27.3.25	RNA.regulation of transcription.MYB domain transcription factor family	highly similar to ( 608) AT5G40405 | Symbols: | FUNCTIONS IN: molecular_function unknown; INVOLVED IN: biological_process unknown; LOCATED IN: cellular_component unknown; CONTAINS InterPro DOMAIN/s: Pentatricopeptide repeat (InterPro:IPR002885); BEST Arabidopsis thaliana protein match is: pentatricopeptide (PPR) repeat-containing protein (TAIR:AT5G66520.1); Has 12548 Blast hits to 5076 proteins i…	T
LOC_Os01g52060.1	35.2	not assigned.unknown	protein|expressed protein	T
LOC_Os01g52370.1	35.2	not assigned.unknown	protein|expressed protein	T
LOC_Os01g52380.1	35.2	not assigned.unknown	protein|expressed protein	T
LOC_Os01g52514.1	27.3.41	RNA.regulation of transcription.B3 transcription factor family	very weakly similar to (87.8) AT3G18990 | Symbols: VRN1, REM39 | VRN1 (REDUCED VERNALIZATION RESPONSE 1); transcription repressor | chr3:6549077-6551568 REVERSE protein|B3 DNA binding domain containing protein, expressed	T
LOC_Os01g52770.1	26.28	misc.GDSL-motif lipase	moderately similar to ( 459) AT5G45670 | Symbols: | GDSL-motif lipase/hydrolase family protein | chr5:18528600-18530164 FORWARDweakly similar to ( 150) APG_BRANA Anter-specific proline-rich protein APG (Protein CEX) (Fragment) - Brassica napus (Rape)SGNH_plant_lipase_like fatty_acyltransferase_like protein|GDSL-like lipase/acylhydrolase, putative, expressed	T
LOC_Os01g53210.1	35.2	not assigned.unknown	protein|metal transporter Nramp3, putative, expressed	T
LOC_Os01g53470.1	33.2	development.late embryogenesis abundant	weakly similar to ( 107) AT2G46150 | Symbols: | FUNCTIONS IN: molecular_function unknown; INVOLVED IN: biological_process unknown; LOCATED IN: plasma membrane; EXPRESSED IN: 15 plant structures; EXPRESSED DURING: 7 growth stages; CONTAINS InterPro DOMAIN/s: Harpin-induced 1 (InterPro:IPR010847); BEST Arabidopsis thaliana protein match is: unknown protein (TAIR:AT3G54200.1); Has 137 Blast hits to …	T
LOC_Os01g54515.1	34.13	transport.peptides and oligopeptides	moderately similar to ( 406) AT1G59740 | Symbols: | proton-dependent oligopeptide transport (POT) family protein | chr1:21968227-21972312 FORWARD PTR2 PTR2 protein|peptide transporter PTR2, putative, expressed	T
LOC_Os01g55160.1	35.2	not assigned.unknown	protein|expressed protein	T
LOC_Os01g56235.1	35.2	not assigned.unknown	weakly similar to ( 194) AT1G16520 | Symbols: | unknown protein | chr1:5648904-5650998 FORWARD protein|expressed protein	T
LOC_Os01g56240.1	17.2.3	hormone metabolism.auxin.induced-regulated-responsive-activated	protein|OsSAUR2 - Auxin-responsive SAUR gene family member, expressed	T
LOC_Os01g56260.1	35.2	not assigned.unknown	protein|expressed protein	T
LOC_Os01g56690.1	35.2	not assigned.unknown	protein|helix-loop-helix DNA-binding domain containing protein, expressed	T
LOC_Os01g56750.1	35.2	not assigned.unknown	protein|OsFBDUF8 - F-box and DUF domain containing protein, expressed	T
LOC_Os01g57530.1	35.2	not assigned.unknown	protein|expressed protein	T
LOC_Os01g58310.1	35.2	not assigned.unknown	protein|expressed protein	T
LOC_Os01g58450.1	35.2	not assigned.unknown	protein|retrotransposon protein, putative, Ty1-copia subclass, expressed	T
LOC_Os01g58930.1	35.2	not assigned.unknown	protein|hypothetical protein	T
LOC_Os01g58960.1	26.1	misc.cytochrome P450	moderately similar to ( 494) AT3G56630 | Symbols: CYP94D2 | CYP94D2; electron carrier/ heme binding / iron ion binding / monooxygenase/ oxygen binding | chr3:20978953-20980512 FORWARDvery weakly similar to (90.5) C97B2_SOYBN Cytochrome P450 97B2 (EC 1.14.-.-) - Glycine max (Soybean) p450 CypX protein|cytochrome P450, putative, expressed	T
LOC_Os01g60520.1	27.3.32	RNA.regulation of transcription.WRKY domain transcription factor family	very weakly similar to (80.9) AT2G46400 | Symbols: WRKY46, ATWRKY46 | WRKY46; transcription factor | chr2:19043676-19044754 REVERSE protein|WRKY116, expressed	T
LOC_Os01g60690.1	35.2	not assigned.unknown	protein|expressed protein	T
LOC_Os01g61170.1	30.5	signalling.G-proteins	weakly similar to ( 122) AT2G40380 | Symbols: PRA1.B2 | PRA1.B2 (PRENYLATED RAB ACCEPTOR 1.B2) | chr2:16864734-16865375 REVERSE PRA1 protein|prenylated rab acceptor, putative, expressed	T
LOC_Os01g61310.1	30.11	signalling.light	moderately similar to ( 213) AT1G07090 | Symbols: LSH6 | LSH6 (LIGHT SENSITIVE HYPOCOTYLS 6) | chr1:2174202-2174792 REVERSEDUF640 protein|DUF640 domain containing protein, putative, expressed	T
LOC_Os01g62510.1	27.3.32	RNA.regulation of transcription.WRKY domain transcription factor family	protein|WRKY119, expressed	T
LOC_Os01g62514.1	27.3.32	RNA.regulation of transcription.WRKY domain transcription factor family	protein|WRKY56, expressed	T
LOC_Os01g64140.1	35.2	not assigned.unknown	protein|endoglucanase 22 precursor, putative, expressed	T
LOC_Os01g64180.2	35.2	not assigned.unknown	protein|expressed protein	T
LOC_Os01g64180.3	35.2	not assigned.unknown	protein|expressed protein	T
LOC_Os01g65150.1	34.13	transport.peptides and oligopeptides	moderately similar to ( 355) AT1G22540 | Symbols: | proton-dependent oligopeptide transport (POT) family protein | chr1:7964202-7966222 FORWARD PTR2 PTR2 protein|proton-dependent oligopeptide transport, putative, expressed	T
LOC_Os01g65700.1	35.2	not assigned.unknown	protein|expressed protein	T
LOC_Os01g65710.1	35.2	not assigned.unknown	protein|expressed protein	T
LOC_Os01g66530.1	35.2	not assigned.unknown	protein|ARGOS, putative, expressed	T
LOC_Os01g66760.1	30.2.3	signalling.receptor kinases.leucine rich repeat III	weakly similar to ( 139) AT5G48380 | Symbols: | leucine-rich repeat family protein / protein kinase family protein | chr5:19604584-19606532 REVERSEvery weakly similar to (94.7) RPK1_IPONI Receptor-like protein kinase precursor (EC 2.7.11.1) - Ipomoea nil (Japanese morning glory) (Pharbitis nil) protein|inactive receptor kinase At2g26730 precursor, putative, expressed	T
LOC_Os01g69190.1	35.2	not assigned.unknown	moderately similar to ( 231) AT1G14590 | Symbols: | FUNCTIONS IN: molecular_function unknown; INVOLVED IN: biological_process unknown; LOCATED IN: chloroplast thylakoid lumen; CONTAINS InterPro DOMAIN/s: Nucleotide-diphospho-sugar transferase, predicted (InterPro:IPR005069); BEST Arabidopsis thaliana protein match is: unknown protein (TAIR:AT2G02061.1); Has 179 Blast hits to 175 proteins in 14 sp…	T
LOC_Os01g70150.1	27.3.7	RNA.regulation of transcription.C2C2(Zn) CO-like, Constans-like zinc finger family	protein|expressed protein	T
LOC_Os01g72270.1	26.1	misc.cytochrome P450	moderately similar to ( 280) AT3G56630 | Symbols: CYP94D2 | CYP94D2; electron carrier/ heme binding / iron ion binding / monooxygenase/ oxygen binding | chr3:20978953-20980512 FORWARDvery weakly similar to (89.0) C97B1_PEA Cytochrome P450 97B1 (EC 1.14.-.-) (P450 97A2) - Pisum sativum (Garden pea) p450 CypX protein|cytochrome P450, putative, expressed	T
LOC_Os01g72300.1	20.2.99	stress.abiotic.unspecified	moderately similar to ( 226) AT3G62020 | Symbols: GLP10 | GLP10 (GERMIN-LIKE PROTEIN 10); manganese ion binding / nutrient reservoir | chr3:22971443-22972192 REVERSEmoderately similar to ( 201) NEC1_NICPL Nectarin-1 precursor (EC 1.15.1.1) (Superoxide dismutase [Mn]) - Nicotiana plumbaginifolia (Leadwort-leaved tobacco)Cupin_1 protein|Cupin domain containing protein, expressed	T
LOC_Os01g72740.1	26.1	misc.cytochrome P450	moderately similar to ( 314) AT5G25120 | Symbols: CYP71B11 | CYP71B11; electron carrier/ heme binding / iron ion binding / monooxygenase/ oxygen binding | chr5:8662851-8664432 FORWARDmoderately similar to ( 384) C71D8_SOYBN Cytochrome P450 71D8 (EC 1.14.-.-) (P450 CP7) - Glycine max (Soybean) p450 CypX protein|cytochrome P450, putative, expressed	T
LOC_Os01g72900.1	35.2	not assigned.unknown	protein|abscisic stress-ripening, putative, expressed	T
LOC_Os01g72910.1	35.2	not assigned.unknown	protein|abscisic stress-ripening, putative, expressed	T
LOC_Os02g01825.1	28.99	DNA.unspecified	weakly similar to ( 133) AT4G29090 | Symbols: | reverse transcriptase, putative / RNA-dependent DNA polymerase, putative | chr4:14333528-14335255 FORWARDRT_nLTR_like protein|retrotransposon protein, putative, unclassified, expressed	T
LOC_Os02g02930.1	16.1.5	secondary metabolism.isoprenoids.terpenoids	moderately similar to ( 333) AT1G61680 | Symbols: TPS14, ATTPS14 | TPS14 (TERPENE SYNTHASE 14); S-linalool synthase | chr1:22772455-22774687 REVERSEmoderately similar to ( 212) DCS1_GOSHI (+)-delta-cadinene synthase (EC 4.2.3.13) (D-cadinene synthase) - Gossypium hirsutum (Upland cotton)Terpene_cyclase_plant_C1 Terpene_synth_C Terpene_cyclase_C1 Terpene_synth protein|terpene synthase, putative, e…	T
LOC_Os02g03310.1	27.3.99	RNA.regulation of transcription.unclassified	moderately similar to ( 212) AT4G26000 | Symbols: PEP | PEP (PEPPER); RNA binding / nucleic acid binding | chr4:13197280-13199539 FORWARD protein|KH domain containing protein, putative, expressed	T
LOC_Os02g08270.1	23.1.99	nucleotide metabolism.synthesis.unspecified	moderately similar to ( 259) AT2G23970 | Symbols: | defense-related protein, putative | chr2:10199698-10201081 FORWARD GATase1_1 PRK05665 GuaA PRK09065 protein|class I glutamine amidotransferase, putative, expressed	T
LOC_Os02g11870.1	35.2	not assigned.unknown	protein|expressed protein	T
LOC_Os02g11980.1	30.2.11	signalling.receptor kinases.leucine rich repeat XI	highly similar to ( 656) AT3G47570 | Symbols: | leucine-rich repeat transmembrane protein kinase, putative | chr3:17527611-17530748 FORWARDmoderately similar to ( 455) RPK1_IPONI Receptor-like protein kinase precursor (EC 2.7.11.1) - Ipomoea nil (Japanese morning glory) (Pharbitis nil) S_TKc TyrKc S_TKc Pkinase_Tyr Pkinase PTKc PTKc_Csk_like PTKc_Src_like PTKc_Jak_rpt2 PTKc_Frk_like PTKc_Srm_Brk …	T
LOC_Os02g12090.1	35.2	not assigned.unknown	protein|expressed protein	T
LOC_Os02g12350.1	27.3.55	RNA.regulation of transcription.HDA	highly similar to ( 659) AT4G38130 | Symbols: HD1, ATHD1, HDA1, RPD3A, HDA19 | HD1 (HISTONE DEACETYLASE 1); basal transcription repressor/ histone deacetylase/ protein binding | chr4:17896663-17899057 REVERSEhighly similar to ( 704) HDAC_MAIZE Probable histone deacetylase (RPD3 homolog) - Zea mays (Maize) Hist_deacetyl AcuC protein|histone deacetylase, putative, expressed	T
LOC_Os02g12410.1	35.2	not assigned.unknown	protein|U-box domain-containing protein, putative, expressed	T
LOC_Os02g12680.1	17.7.1.3	hormone metabolism.jasmonate.synthesis-degradation.allene oxidase synthase	moderately similar to ( 386) AT5G42650 | Symbols: AOS, CYP74A, DDE2 | AOS (ALLENE OXIDE SYNTHASE); allene oxide synthase/ hydro-lyase/ oxygen binding | chr5:17097803-17099359 REVERSEhighly similar to ( 870) C74A3_ORYSA Cytochrome P450 74A3 (EC 4.2.1.92) (Allene oxide synthase 3) (Hydroperoxide dehydrase 3) - Oryza sativa (Rice) protein|cytochrome P450, putative, expressed	T
LOC_Os02g15500.1	17.5.2	hormone metabolism.ethylene.signal transduction	weakly similar to ( 172) AT2G36430 | Symbols: | unknown protein | chr2:15290211-15291557 FORWARDDUF247 protein|plant protein of unknown function domain containing protein, expressed	T
LOC_Os02g15920.1	35.2	not assigned.unknown	protein|expressed protein	T
LOC_Os02g16050.1	27.3.99	RNA.regulation of transcription.unclassified	weakly similar to ( 138) AT1G48120 | Symbols: | calcineurin-like phosphoesterase family protein | chr1:17774238-17779624 REVERSEDUF1979 DUF1723 protein|transposon protein, putative, unclassified, expressed	T
LOC_Os02g16940.1	29.5.1	protein.degradation.subtilases	highly similar to ( 520) AT1G32960 | Symbols: ATSBT3.3, SBT3.3 | SBT3.3; identical protein binding / serine-type endopeptidase | chr1:11945351-11948429 FORWARD protein|OsSub13 - Putative Subtilisin homologue, expressed	T
LOC_Os02g16995.1	35.2	not assigned.unknown	protein|expressed protein	T
LOC_Os02g17000.1	29.5.1	protein.degradation.subtilases	moderately similar to ( 345) AT4G10520 | Symbols: | subtilase family protein | chr4:6499794-6502866 FORWARD protein|OsSub14 - Putative Subtilisin homologue, expressed	T
LOC_Os02g18520.1	27.2	RNA.transcription	very weakly similar to (93.2) RRPO_OENBE RNA-directed DNA polymerase homolog (Reverse transcriptase homolog) - Oenothera bertiana (Berteros evening primrose)RVP_2 RT_LTR Retrotrans_gag protein|retrotransposon protein, putative, Ty3-gypsy subclass, expressed	T
LOC_Os02g18530.1	35.2	not assigned.unknown	protein|expressed protein	T
LOC_Os02g18540.1	35.2	not assigned.unknown	very weakly similar to (92.0) AT3G18460 | Symbols: | unknown protein | chr3:6333048-6333948 REVERSEPLAC8 protein|uncharacterized Cys-rich domain containing protein, putative, expressed	T
LOC_Os02g25610.1	35.2	not assigned.unknown	protein|expressed protein	T
LOC_Os02g26280.1	35.2	not assigned.unknown	protein|retrotransposon protein, putative, unclassified, expressed	T
LOC_Os02g26330.1	35.2	not assigned.unknown	protein|expressed protein	T
LOC_Os02g26380.1	35.2	not assigned.unknown	protein|expressed protein	T
LOC_Os02g26430.1	27.3.32	RNA.regulation of transcription.WRKY domain transcription factor family	weakly similar to ( 122) AT4G31550 | Symbols: WRKY11, ATWRKY11 | WRKY11; calmodulin binding / transcription factor | chr4:15290065-15291458 REVERSEWRKY protein|WRKY42, expressed	T
LOC_Os02g27200.1	26.7	misc.oxidases - copper, flavone etc.	moderately similar to ( 241) AT4G15760 | Symbols: MO1 | MO1 (MONOOXYGENASE 1); electron carrier/ oxidoreductase | chr4:8972785-8974548 REVERSE UbiH PRK06847 FAD_binding_3 PRK08163 PRK06753 PRK07538 protein|expressed protein	T
LOC_Os02g27450.1	35.2	not assigned.unknown	protein|expressed protein	T
LOC_Os02g28870.1	35.2	not assigned.unknown	protein|U-box domain-containing protein, putative, expressed	T
LOC_Os02g29640.1	30.11	signalling.light	moderately similar to ( 207) AT4G38180 | Symbols: FRS5 | FRS5 (FAR1-related sequence 5); zinc ion binding | chr4:17906702-17909404 REVERSE protein|transposon protein, putative, unclassified, expressed	T
LOC_Os02g30060.1	26.22	misc.short chain dehydrogenase/reductase (SDR)	moderately similar to ( 350) AT1G24360 | Symbols: | 3-oxoacyl-(acyl-carrier protein) reductase, chloroplast / 3-ketoacyl-acyl carrier protein reductase | chr1:8640820-8643283 FORWARDmoderately similar to ( 370) FABG2_BRANA 3-oxoacyl-[acyl-carrier-protein] reductase 2, chloroplast precursor (EC 1.1.1.100) (3-ketoacyl-acyl carrier protein reductase 2) - Brassica napus (Rape) fabG fabG fabG PRK12826…	T
LOC_Os02g30150.1	20.1.7	stress.biotic.PR-proteins	moderately similar to ( 354) AT3G14470 | Symbols: | disease resistance protein (NBS-LRR class), putative | chr3:4857940-4861104 FORWARD NB-ARC protein|disease resistance protein, putative, expressed	T
LOC_Os02g30380.1	35.2	not assigned.unknown	protein|expressed protein	T
LOC_Os02g30780.1	35.2	not assigned.unknown	protein|LGC1, putative, expressed	T
LOC_Os02g32440.1	35.2	not assigned.unknown	protein|expressed protein	T
LOC_Os02g32850.1	35.2	not assigned.unknown	protein|expressed protein	T
LOC_Os02g33590.1	27.3.64	RNA.regulation of transcription.PHOR1	moderately similar to ( 241) AT3G52450 | Symbols: PUB22 | PUB22 (PLANT U-BOX 22); ubiquitin-protein ligase | chr3:19440943-19442250 REVERSEvery weakly similar to (81.3) SPL11_ORYSA Spotted leaf protein 11 (Spotted leaf11) (Cell death-related protein SPL11) - Oryza sativa (Rice)Ubox U-box protein|U-box domain-containing protein, putative, expressed	T
LOC_Os02g33670.1	35.2	not assigned.unknown	protein|expressed protein	T
LOC_Os02g34120.1	35.2	not assigned.unknown	protein|expressed protein	T
LOC_Os02g34130.1	35.2	not assigned.unknown	Transposase_21 protein|transposon protein, putative, CACTA, En/Spm sub-class, expressed	T
LOC_Os02g34520.1	35.2	not assigned.unknown	protein|retrotransposon protein, putative, Ty1-copia subclass, expressed	T
LOC_Os02g34760.1	35.2	not assigned.unknown	protein|retrotransposon protein, putative, unclassified, expressed	T
LOC_Os02g35240.1	17.5.2	hormone metabolism.ethylene.signal transduction	AP2 AP2 protein|dehydration-responsive element-binding protein, putative, expressed	T
LOC_Os02g35970.1	30.11	signalling.light	highly similar to ( 692) AT5G64330 | Symbols: NPH3, RPT3, JK218 | NPH3 (NON-PHOTOTROPIC HYPOCOTYL 3); protein binding / signal transducer | chr5:25727568-25729510 FORWARDnearly identical (1028) NPH3_ORYSA Coleoptile phototropism protein 1 (Non-phototropic hypocotyl 3-like protein) (NPH3-like protein) - Oryza sativa (Rice)NPH3 protein|BTBN2 - Bric-a-Brac, Tramtrack, Broad Complex BTB domain with n…	T
LOC_Os02g37200.1	35.2	not assigned.unknown	protein|hydrophobin, putative, expressed	T
LOC_Os02g37280.1	35.2	not assigned.unknown	protein|heavy metal transport/detoxification protein, putative, expressed	T
LOC_Os02g37290.1	35.2	not assigned.unknown	protein|heavy metal associated domain containing protein, expressed	T
LOC_Os02g37300.1	35.2	not assigned.unknown	protein|heavy metal associated domain containing protein, expressed	T
LOC_Os02g37760.1	11.8	lipid metabolism.exotics (steroids, squalene etc)	protein|lecithine cholesterol acyltransferase, putative, expressed	T
LOC_Os02g37770.1	11.8.10	lipid metabolism.exotics (steroids, squalene etc).phosphatidylcholinesterol O-acyltransferase	weakly similar to ( 176) AT1G27480 | Symbols: | lecithin:cholesterol acyltransferase family protein / LACT family protein | chr1:9544607-9546168 FORWARD LACT protein|lecithin cholesterol acyltransferase, putative, expressed	T
LOC_Os02g37780.1	35.2	not assigned.unknown	protein|lecithine cholesterol acyltransferase, putative, expressed	T
LOC_Os02g37790.1	35.2	not assigned.unknown	weakly similar to ( 193) POLX_TOBAC Retrovirus-related Pol polyprotein from transposon TNT 1-94 [Includes: Protease (EC 3.4.23.-); Reverse transcriptase (EC 2.7.7.49); Endonuclease] - Nicotiana tabacum (Common tobacco) protein|retrotransposon protein, putative, unclassified, expressed	T
LOC_Os02g38000.1	30.2.17	signalling.receptor kinases.DUF 26	moderately similar to ( 210) AT4G23160 | Symbols: | protein kinase family protein | chr4:12129485-12134086 FORWARDmoderately similar to ( 245) POLX_TOBAC Retrovirus-related Pol polyprotein from transposon TNT 1-94 [Includes: Protease (EC 3.4.23.-); Reverse transcriptase (EC 2.7.7.49); Endonuclease] - Nicotiana tabacum (Common tobacco)RVT_2 rve protein|retrotransposon protein, putative, unclassifi…	T
LOC_Os02g41460.1	30.11	signalling.light	weakly similar to ( 200) AT2G31160 | Symbols: LSH3 | LSH3 (LIGHT SENSITIVE HYPOCOTYLS 3) | chr2:13277903-13278562 FORWARDDUF640 protein|DUF640 domain containing protein, putative, expressed	T
LOC_Os02g41480.1	29.4.1.57	protein.postranslational modification.kinase.receptor like cytoplasmatic kinase VII	moderately similar to ( 330) AT1G21240 | Symbols: WAK3 | WAK3 (wall associated kinase 3); kinase/ protein serine/threonine kinase | chr1:7434303-7436702 FORWARDmoderately similar to ( 219) NORK_MEDTR Nodulation receptor kinase precursor (EC 2.7.11.1) (Does not make infections protein 2) (Symbiosis receptor-like kinase) (MtSYMRK) - Medicago truncatula (Barrel medic) Pkinase_Tyr S_TKc TyrKc PTKc S_…	T
LOC_Os02g41830.1	35.2	not assigned.unknown	protein|expressed protein	T
LOC_Os02g41954.1	17.5.1	hormone metabolism.ethylene.synthesis-degradation	moderately similar to ( 309) AT4G21200 | Symbols: ATGA2OX8, GA2OX8 | GA2OX8 (GIBBERELLIN 2-OXIDASE 8); gibberellin 2-beta-dioxygenase | chr4:11302751-11304032 FORWARDweakly similar to ( 122) GAO1D_WHEAT Gibberellin 20 oxidase 1-D (EC 1.14.11.-) (Gibberellin C-20 oxidase 1-D) (GA 20-oxidase 1-D) (Ta20ox1D) (TaGA20ox1-D) (Protein Wga20) - Triticum aestivum (Wheat) PcbC 2OG-FeII_Oxy protein|gibberel…	T
LOC_Os02g41954.2	17.5.1	hormone metabolism.ethylene.synthesis-degradation	moderately similar to ( 218) AT4G21200 | Symbols: ATGA2OX8, GA2OX8 | GA2OX8 (GIBBERELLIN 2-OXIDASE 8); gibberellin 2-beta-dioxygenase | chr4:11302751-11304032 FORWARDvery weakly similar to (84.0) G3O23_WHEAT Gibberellin 3-beta-dioxygenase 2-3 (EC 1.14.11.15) (Gibberellin 3 beta-hydroxylase 2-3) (Gibberellin 3-oxidase 2-3) - Triticum aestivum (Wheat) PcbC protein|gibberellin 2-beta-dioxygenase 7, …	T
LOC_Os02g42390.1	35.2	not assigned.unknown	protein|expressed protein	T
LOC_Os02g42470.1	35.2	not assigned.unknown	protein|expressed protein	T
LOC_Os02g43330.1	27.3.22	RNA.regulation of transcription.HB,Homeobox transcription factor family	weakly similar to ( 110) AT4G40060 | Symbols: ATHB16, ATHB-16 | ATHB16 (ARABIDOPSIS THALIANA HOMEOBOX PROTEIN 16); sequence-specific DNA binding / transcription activator/ transcription factor | chr4:18571682-18572774 REVERSE protein|homeobox associated leucine zipper, putative, expressed	T
LOC_Os02g43560.1	27.3.32	RNA.regulation of transcription.WRKY domain transcription factor family	weakly similar to ( 103) AT2G44745 | Symbols: | WRKY family transcription factor | chr2:18447482-18449004 REVERSE protein|WRKY34, expressed	T
LOC_Os02g44040.1	35.2	not assigned.unknown	weakly similar to ( 165) AT4G17350 | Symbols: | phosphoinositide binding | chr4:9701582-9703358 FORWARDDUF828 PH_2 protein|expressed protein	T
LOC_Os02g44840.1	35.2	not assigned.unknown	protein|expressed protein	T
LOC_Os02g45420.1	27.3.3	RNA.regulation of transcription.AP2/EREBP, APETALA2/Ethylene-responsive element binding protein family	very weakly similar to (98.6) AT5G52020 | Symbols: | AP2 domain-containing protein | chr5:21124192-21124890 REVERSEAP2 AP2 protein|AP2 domain containing protein, expressed	T
LOC_Os02g45450.1	27.3.3	RNA.regulation of transcription.AP2/EREBP, APETALA2/Ethylene-responsive element binding protein family	weakly similar to ( 119) AT4G25470 | Symbols: CBF2, DREB1C, FTQ4, ATCBF2 | CBF2 (C-REPEAT/DRE BINDING FACTOR 2); DNA binding / transcription activator/ transcription factor | chr4:13015436-13016086 REVERSEAP2 AP2 protein|dehydration-responsive element-binding protein, putative, expressed	T
LOC_Os02g45850.1	27.3.1	RNA.regulation of transcription.ABI3/VP1-related B3-domain-containing transcription factor family	moderately similar to ( 202) AT1G01030 | Symbols: NGA3 | NGA3 (NGATHA3); transcription factor | chr1:11864-12940 REVERSEB3 protein|B3 DNA binding domain containing protein, expressed	T
LOC_Os02g48280.1	35.2	not assigned.unknown	protein|expressed protein	T
LOC_Os02g48770.1	17.8.1	hormone metabolism.salicylic acid.synthesis-degradation	moderately similar to ( 248) AT3G11480 | Symbols: BSMT1, ATBSMT1 | BSMT1; S-adenosylmethionine-dependent methyltransferase | chr3:3614544-3617137 FORWARDmoderately similar to ( 232) BAMT_ANTMA Benzoate carboxyl methyltransferase (EC 2.1.1.-) (S-adenosyl-L-methionine:benzoic acid carboxyl methyltransferase) - Antirrhinum majus (Garden snapdragon)Methyltransf_7 protein|SAM dependent carboxyl methyl…	T
LOC_Os02g49180.1	27.2	RNA.transcription	moderately similar to ( 297) AT1G60620 | Symbols: ATRPAC43 | ATRPAC43; DNA binding / DNA-directed RNA polymerase/ protein dimerization | chr1:22331225-22333370 FORWARD RPOLD PRK00783 protein|RNA polymerase subunit, putative, expressed	T
LOC_Os02g50090.1	35.2	not assigned.unknown	protein|retrotransposon protein, putative, unclassified, expressed	T
LOC_Os02g50220.1	35.2	not assigned.unknown	protein|expressed protein	T
LOC_Os02g50900.1	35.2	not assigned.unknown	moderately similar to ( 347) AT1G60060 | Symbols: | unknown protein | chr1:22139282-22141585 FORWARD protein|expressed protein	T
LOC_Os02g51050.1	35.2	not assigned.unknown	protein|Leucine rich repeat N-terminal domain containing protein, putative, expressed	T
LOC_Os02g51950.1	35.2	not assigned.unknown	very weakly similar to (84.3) AT5G10310 | Symbols: | unknown protein | chr5:3241666-3242127 REVERSE protein|expressed protein	T
LOC_Os02g53590.1	35.2	not assigned.unknown	protein|DEFL71 - Defensin and Defensin-like DEFL family, expressed	T
LOC_Os02g55380.1	17.5.2	hormone metabolism.ethylene.signal transduction	weakly similar to ( 107) AT5G25190 | Symbols: | ethylene-responsive element-binding protein, putative | chr5:8707007-8707655 REVERSEAP2 AP2 protein|AP2 domain containing protein, expressed	T
LOC_Os02g56830.1	35.2	not assigned.unknown	moderately similar to ( 207) AT5G41980 | Symbols: | unknown protein | chr5:16793765-16794889 FORWARD protein|transposon protein, putative, CACTA, En/Spm sub-class, expressed	T
LOC_Os02g56860.1	11.1.10	lipid metabolism.FA synthesis and FA elongation.beta ketoacyl CoA synthase	moderately similar to ( 439) AT2G28630 | Symbols: KCS12 | KCS12 (3-KETOACYL-COA SYNTHASE 12); acyltransferase/ catalytic/ transferase, transferring acyl groups other than amino-acyl groups | chr2:12275719-12277149 REVERSEFAE1_CUT1_RppA CHS_like BcsA KAS_III FabH protein|3-ketoacyl-CoA synthase, putative, expressed	T
LOC_Os02g57350.1	35.2	not assigned.unknown	protein|expressed protein	T
LOC_Os02g57770.1	10.7	cell wall.modification	moderately similar to ( 305) AT2G36870 | Symbols: | xyloglucan:xyloglucosyl transferase, putative / xyloglucan endotransglycosylase, putative / endo-xyloglucan transferase, putative | chr2:15472869-15474630 REVERSEweakly similar to ( 187) XTH_TOBAC Probable xyloglucan endotransglucosylase/hydrolase protein precursor (EC 2.4.1.207) - Nicotiana tabacum (Common tobacco)GH16_XET Glyco_hydro_16 Glyco_…	T
LOC_Os02g57810.1	26.1	misc.cytochrome P450	moderately similar to ( 474) AT5G52400 | Symbols: CYP715A1 | CYP715A1; electron carrier/ heme binding / iron ion binding / monooxygenase/ oxygen binding | chr5:21272949-21275509 FORWARDmoderately similar to ( 203) C72A1_CATRO Cytochrome P450 72A1 (EC 1.3.3.9) (CYPLXXII) (Secologanin synthase) (SLS) - Catharanthus roseus (Rosy periwinkle) (Madagascar periwinkle) p450 CypX protein|cytochrome P450, …	T
LOC_Os03g01870.1	33.99	development.unspecified	weakly similar to ( 191) AT4G28530 | Symbols: anac074 | anac074 (Arabidopsis NAC domain containing protein 74); transcription factor | chr4:14090725-14094603 REVERSEweakly similar to ( 162) NAC77_ORYSA NAC domain-containing protein 77 (ONAC077) (ONAC300) - Oryza sativa (Rice)NAM protein|no apical meristem protein, putative, expressed	T
LOC_Os03g04210.1	30.3	signalling.calcium	very weakly similar to (93.2) AT3G51380 | Symbols: IQD20 | IQD20 (IQ-domain 20); calmodulin binding | chr3:19074036-19074426 REVERSE protein|IQ calmodulin-binding motif family protein, putative, expressed	T
LOC_Os03g05880.1	26.7	misc.oxidases - copper, flavone etc.	moderately similar to ( 275) AT4G38540 | Symbols: | monooxygenase, putative (MO2) | chr4:18023187-18024827 FORWARD PRK06753 UbiH PRK06847 protein|monooxygenase, putative, expressed	T
LOC_Os03g05880.2	26.7	misc.oxidases - copper, flavone etc.	moderately similar to ( 274) AT4G38540 | Symbols: | monooxygenase, putative (MO2) | chr4:18023187-18024827 FORWARD PRK06753 UbiH PRK06847 protein|monooxygenase, putative, expressed	T
LOC_Os03g06900.1	28.1	DNA.synthesis/chromatin structure	nearly identical (1057) AT5G63920 | Symbols: | DNA topoisomerase III alpha, putative | chr5:25574533-25581230 FORWARD TopA TOP1Ac Topoisom_bac PRK07220 PRK07219 TOP1Ac PRK05776 TOPRIM_TopoIA_TopoIII PRK08620 TOPRIM_TopoIA PRK09401 COG1110 PRK08174 PRK09031 PRK09137 PRK08780 PRK08938 PRK07726 PRK06319 PRK09001 PRK09138 PRK08173 PRK05582 PRK08413 PRK05823 TOP1Bc PRK07561 protein|DNA topoisomerase 3…	T
LOC_Os03g07400.1	35.2	not assigned.unknown	protein|expressed protein	T
LOC_Os03g07540.1	35.2	not assigned.unknown	protein|bHLH family protein, putative, expressed	T
LOC_Os03g07720.1	35.2	not assigned.unknown	protein|expressed protein	T
LOC_Os03g08540.1	35.2	not assigned.unknown	protein|expressed protein	T
LOC_Os03g09830.2	35.2	not assigned.unknown	protein|expressed protein	T
LOC_Os03g10300.1	35.2	not assigned.unknown	moderately similar to ( 382) AT4G37680 | Symbols: HHP4 | HHP4 (heptahelical protein 4); receptor | chr4:17701231-17702568 FORWARD HlyIII COG1272 protein|haemolysin-III, putative, expressed	T
LOC_Os03g12500.1	17.7.1.3	hormone metabolism.jasmonate.synthesis-degradation.allene oxidase synthase	moderately similar to ( 424) AT5G42650 | Symbols: AOS, CYP74A, DDE2 | AOS (ALLENE OXIDE SYNTHASE); allene oxide synthase/ hydro-lyase/ oxygen binding | chr5:17097803-17099359 REVERSEhighly similar to ( 791) C74A2_ORYSA Cytochrome P450 74A2 (EC 4.2.1.92) (Allene oxide synthase 2) (Hydroperoxide dehydrase 2) - Oryza sativa (Rice) protein|cytochrome P450, putative, expressed	T
LOC_Os03g13290.1	35.2	not assigned.unknown	protein|expressed protein	T
LOC_Os03g14920.1	35.2	not assigned.unknown	protein|expressed protein	T
LOC_Os03g16450.1	27.3	RNA.regulation of transcription	moderately similar to ( 355) AT5G59600 | Symbols: | pentatricopeptide (PPR) repeat-containing protein | chr5:24011315-24012919 REVERSEweakly similar to ( 117) RF1_ORYSA Rf1 protein, mitochondrial precursor (PPR protein) (Fertility restorer) (Restorer for CMS) - Oryza sativa (Rice) protein|pentatricopeptide, putative, expressed	T
LOC_Os03g16500.1	27.3.99	RNA.regulation of transcription.unclassified	moderately similar to ( 385) AT2G39710 | Symbols: | aspartyl protease family protein | chr2:16562051-16563379 REVERSE protein|aspartic proteinase nepenthesin precursor, putative, expressed	T
LOC_Os03g18030.1	16.8.1	secondary metabolism.flavonoids.anthocyanins	moderately similar to ( 368) AT3G11180 | Symbols: | oxidoreductase, 2OG-Fe(II) oxygenase family protein | chr3:3504249-3506688 FORWARDweakly similar to ( 177) FLS_PETHY Flavonol synthase/flavanone 3-hydroxylase (EC 1.14.11.23) (EC 1.14.11.9) (FLS) - Petunia hybrida (Petunia) PcbC 2OG-FeII_Oxy protein|leucoanthocyanidin dioxygenase, putative, expressed	T
LOC_Os03g18030.2	16.8.1	secondary metabolism.flavonoids.anthocyanins	moderately similar to ( 277) AT3G11180 | Symbols: | oxidoreductase, 2OG-Fe(II) oxygenase family protein | chr3:3504249-3506688 FORWARDweakly similar to ( 140) FLS_PETHY Flavonol synthase/flavanone 3-hydroxylase (EC 1.14.11.23) (EC 1.14.11.9) (FLS) - Petunia hybrida (Petunia) PcbC protein|leucoanthocyanidin dioxygenase, putative, expressed	T
LOC_Os03g21260.1	35.2	not assigned.unknown	highly similar to ( 896) AT1G09780 | Symbols: | 2,3-biphosphoglycerate-independent phosphoglycerate mutase, putative / phosphoglyceromutase, putative | chr1:3165550-3167812 REVERSEhighly similar to ( 948) PMGI_RICCO 2,3-bisphosphoglycerate-independent phosphoglycerate mutase (EC 5.4.2.1) (Phosphoglyceromutase) (BPG-independent PGAM) (PGAM-I) - Ricinus communis (Castor bean) PRK05434 iPGM_N GpmI M…	T
LOC_Os03g21820.1	10.7	cell wall.modification	moderately similar to ( 297) AT2G40610 | Symbols: ATEXPA8, EXP8, ATEXP8, ATHEXP ALPHA 1.11 | ATEXPA8 (ARABIDOPSIS THALIANA EXPANSIN A8) | chr2:16949121-16950472 REVERSEmoderately similar to ( 397) EXPA6_ORYSA Expansin-A6 precursor (OsEXPA6) (Alpha-expansin-6) (OsEXP6) (OsaEXPa1.24) - Oryza sativa (Rice)Pollen_allerg_1 DPBB_1 protein|expansin precursor, putative, expressed	T
LOC_Os03g24260.1	30.2.17	signalling.receptor kinases.DUF 26	moderately similar to ( 334) AT4G23160 | Symbols: | protein kinase family protein | chr4:12129485-12134086 FORWARDhighly similar to ( 700) POLX_TOBAC Retrovirus-related Pol polyprotein from transposon TNT 1-94 [Includes: Protease (EC 3.4.23.-); Reverse transcriptase (EC 2.7.7.49); Endonuclease] - Nicotiana tabacum (Common tobacco)RVT_2 rve protein|retrotransposon protein, putative, unclassified, …	T
LOC_Os03g24650.1	16.1.5	secondary metabolism.isoprenoids.terpenoids	weakly similar to ( 117) AT3G14520 | Symbols: | terpene synthase/cyclase family protein | chr3:4875868-4878243 REVERSEweakly similar to ( 145) DCS1_GOSHI (+)-delta-cadinene synthase (EC 4.2.3.13) (D-cadinene synthase) - Gossypium hirsutum (Upland cotton)Terpene_cyclase_plant_C1 Terpene_synth_C Terpene_cyclase_C1 protein|terpene synthase family, metal binding domain containing protein, expressed	T
LOC_Os03g26620.1	11.1.10	lipid metabolism.FA synthesis and FA elongation.beta ketoacyl CoA synthase	moderately similar to ( 426) AT2G28630 | Symbols: KCS12 | KCS12 (3-KETOACYL-COA SYNTHASE 12); acyltransferase/ catalytic/ transferase, transferring acyl groups other than amino-acyl groups | chr2:12275719-12277149 REVERSEFAE1_CUT1_RppA CHS_like BcsA KAS_III FabH protein|3-ketoacyl-CoA synthase, putative, expressed	T
LOC_Os03g30150.1	35.2	not assigned.unknown	protein|expressed protein	T
LOC_Os03g39650.1	26.1	misc.cytochrome P450	moderately similar to ( 327) AT3G26300 | Symbols: CYP71B34 | CYP71B34; electron carrier/ heme binding / iron ion binding / monooxygenase/ oxygen binding | chr3:9639199-9640866 REVERSEmoderately similar to ( 414) C71DA_SOYBN Cytochrome P450 71D10 (EC 1.14.-.-) - Glycine max (Soybean) p450 CypX protein|cytochrome P450, putative, expressed	T
LOC_Os03g40250.1	35.2	not assigned.unknown	weakly similar to ( 172) AT5G45500 | Symbols: | unknown protein | chr5:18432636-18434951 REVERSE protein|Leucine Rich Repeat family protein, expressed	T
LOC_Os03g41480.1	35.2	not assigned.unknown	protein|expressed protein	T
LOC_Os03g42370.1	27.3.41	RNA.regulation of transcription.B3 transcription factor family	very weakly similar to (87.8) AT4G33280 | Symbols: | DNA binding / transcription factor | chr4:16047357-16049310 REVERSE protein|B3 DNA binding domain containing protein, expressed	T
LOC_Os03g44710.1	27.3.10	RNA.regulation of transcription.C2C2(Zn) YABBY family	weakly similar to ( 163) AT2G26580 | Symbols: YAB5 | YAB5 (YABBY5); transcription factor | chr2:11303923-11306739 REVERSEweakly similar to ( 159) YAB1_ORYSA Protein YABBY (OsYAB1) (Filamentous flower protein 1) - Oryza sativa (Rice)YABBY protein|YABBY domain containing protein, putative, expressed	T
LOC_Os03g44710.2	27.3.10	RNA.regulation of transcription.C2C2(Zn) YABBY family	weakly similar to ( 163) AT2G26580 | Symbols: YAB5 | YAB5 (YABBY5); transcription factor | chr2:11303923-11306739 REVERSEweakly similar to ( 159) YAB1_ORYSA Protein YABBY (OsYAB1) (Filamentous flower protein 1) - Oryza sativa (Rice)YABBY protein|YABBY domain containing protein, putative, expressed	T
LOC_Os03g44710.3	27.3.10	RNA.regulation of transcription.C2C2(Zn) YABBY family	YABBY protein|YABBY domain containing protein, putative, expressed	T
LOC_Os03g44870.1	35.2	not assigned.unknown	protein|expressed protein	T
LOC_Os03g46290.1	35.2	not assigned.unknown	protein|expressed protein	T
LOC_Os03g46420.1	35.2	not assigned.unknown	protein|expressed protein	T
LOC_Os03g47280.1	35.2	not assigned.unknown	protein|VQ domain containing protein, putative, expressed	T
LOC_Os03g47564.1	35.2	not assigned.unknown	protein|expressed protein	T
LOC_Os03g48610.1	10.3	cell wall.hemicellulose synthesis	highly similar to ( 643) AT5G62620 | Symbols: | galactosyltransferase family protein | chr5:25137136-25139433 FORWARD Galactosyl_T Gal-bind_lectin protein|galactosyltransferase family protein, putative, expressed	T
LOC_Os03g48960.1	35.2	not assigned.unknown	protein|expressed protein	T
LOC_Os03g49160.1	35.2	not assigned.unknown	protein|expressed protein	T
LOC_Os03g49790.1	33.99	development.unspecified	moderately similar to ( 203) AT5G19610 | Symbols: | sec7 domain-containing protein | chr5:6617746-6622045 REVERSE protein|pattern formation protein EMB30, putative, expressed	T
LOC_Os03g50250.1	20.2.1	stress.abiotic.heat	highly similar to ( 888) AT5G28540 | Symbols: BIP1 | BIP1; ATP binding | chr5:10540665-10543274 REVERSEhighly similar to ( 900) BIP4_TOBAC Luminal-binding protein 4 precursor (BiP 4) (78 kDa glucose-regulated protein homolog 4) (GRP 78-4) - Nicotiana tabacum (Common tobacco) HSP70 dnaK DnaK dnaK hscA hscA PRK11678 protein|DnaK family protein, putative, expressed	T
LOC_Os03g53350.1	26.2	misc.UDP glucosyl and glucoronyl transferases	moderately similar to ( 221) AT2G15480 | Symbols: UGT73B5 | UGT73B5 (UDP-glucosyl transferase 73B5); UDP-glucosyltransferase/ UDP-glycosyltransferase/ quercetin 3-O-glucosyltransferase/ transferase, transferring glycosyl groups | chr2:6758817-6760452 FORWARDweakly similar to ( 120) ZOX_PHAVU Zeatin O-xylosyltransferase (EC 2.4.2.40) (Zeatin O-beta-D-xylosyltransferase) - Phaseolus vulgaris (Kidne…	T
LOC_Os03g55880.1	35.2	not assigned.unknown	protein|expressed protein	T
LOC_Os03g56140.1	27.3.22	RNA.regulation of transcription.HB,Homeobox transcription factor family	weakly similar to ( 148) AT4G08150 | Symbols: KNAT1, BP, BP1 | KNAT1 (KNOTTED-LIKE FROM ARABIDOPSIS THALIANA); transcription factor | chr4:5147969-5150610 REVERSEweakly similar to ( 171) RSH1_MAIZE Homeobox protein rough sheath 1 - Zea mays (Maize) protein|homeobox protein rough sheath 1, putative, expressed	T
LOC_Os03g56140.2	27.3.22	RNA.regulation of transcription.HB,Homeobox transcription factor family	weakly similar to ( 164) AT4G08150 | Symbols: KNAT1, BP, BP1 | KNAT1 (KNOTTED-LIKE FROM ARABIDOPSIS THALIANA); transcription factor | chr4:5147969-5150610 REVERSEweakly similar to ( 185) RSH1_MAIZE Homeobox protein rough sheath 1 - Zea mays (Maize) protein|homeobox protein rough sheath 1, putative, expressed	T
LOC_Os03g56180.1	30.2.99	signalling.receptor kinases.misc	moderately similar to ( 364) AT3G53810 | Symbols: | lectin protein kinase, putative | chr3:19933153-19935186 REVERSEvery weakly similar to (90.5) NORK_PEA Nodulation receptor kinase precursor (EC 2.7.11.1) - Pisum sativum (Garden pea) Lectin_legB Pkinase S_TKc S_TKc TyrKc PTKc Pkinase_Tyr protein|legume lectins beta domain containing protein, expressed	T
LOC_Os03g57520.1	35.2	not assigned.unknown	protein|VQ domain containing protein, putative, expressed	T
LOC_Os03g58500.1	35.2	not assigned.unknown	protein|expressed protein	T
LOC_Os03g60220.1	35.2	not assigned.unknown	weakly similar to ( 136) AT5G01750 | Symbols: | unknown protein | chr5:290034-291109 FORWARDDUF567 protein|DUF567 domain containing protein, putative, expressed	T
LOC_Os03g62539.1	35.2	not assigned.unknown	protein|expressed protein	T
LOC_Os03g63810.1	27.3.32	RNA.regulation of transcription.WRKY domain transcription factor family	weakly similar to ( 174) AT1G30650 | Symbols: WRKY14, ATWRKY14, AR411 | WRKY14; transcription factor | chr1:10868612-10870973 FORWARDWRKY protein|WRKY80, expressed	T
LOC_Os04g01810.1	16.1.5	secondary metabolism.isoprenoids.terpenoids	weakly similar to ( 194) AT5G44630 | Symbols: | terpene synthase/cyclase family protein | chr5:18003280-18005616 FORWARDmoderately similar to ( 257) CASS_RICCO Casbene synthase, chloroplast precursor (EC 4.2.3.8) - Ricinus communis (Castor bean)Terpene_cyclase_plant_C1 Terpene_synth Terpene_synth_C Terpene_cyclase_C1 protein|terpene synthase, putative, expressed	T
LOC_Os04g01950.1	35.2	not assigned.unknown	protein|legume lectins beta domain containing protein, putative, expressed	T
LOC_Os04g03100.1	29.5.1	protein.degradation.subtilases	highly similar to ( 560) AT4G10540 | Symbols: | subtilase family protein | chr4:6512515-6515743 REVERSE protein|OsSub35 - Putative Subtilisin homologue, expressed	T
LOC_Os04g06900.1	35.2	not assigned.unknown	weakly similar to ( 132) AT5G45540 | Symbols: | unknown protein | chr5:18458294-18460705 REVERSE protein|expressed protein	T
LOC_Os04g06910.1	35.2	not assigned.unknown	very weakly similar to (92.4) AT5G45480 | Symbols: | unknown protein | chr5:18426296-18428929 REVERSE protein|expressed protein	T
LOC_Os04g09620.1	35.2	not assigned.unknown	protein|expressed protein	T
LOC_Os04g09720.1	29.5.5	protein.degradation.serine protease	moderately similar to ( 424) AT2G23000 | Symbols: scpl10 | scpl10 (serine carboxypeptidase-like 10); serine-type carboxypeptidase | chr2:9792284-9795741 FORWARDmoderately similar to ( 336) CBP1_HORVU Serine carboxypeptidase 1 precursor (EC 3.4.16.5) (Serine carboxypeptidase I) (Carboxypeptidase C) (CP-MI) [Contains: Serine carboxypeptidase 1 chain A (Serine carboxypeptidase I chain A); Serine car…	T
LOC_Os04g09720.2	29.5.5	protein.degradation.serine protease	moderately similar to ( 424) AT2G23000 | Symbols: scpl10 | scpl10 (serine carboxypeptidase-like 10); serine-type carboxypeptidase | chr2:9792284-9795741 FORWARDmoderately similar to ( 336) CBP1_HORVU Serine carboxypeptidase 1 precursor (EC 3.4.16.5) (Serine carboxypeptidase I) (Carboxypeptidase C) (CP-MI) [Contains: Serine carboxypeptidase 1 chain A (Serine carboxypeptidase I chain A); Serine car…	T
LOC_Os04g11962.1	35.2	not assigned.unknown	protein|expressed protein	T
LOC_Os04g12460.1	35.2	not assigned.unknown	protein|Leucine Rich Repeat family protein, expressed	T
LOC_Os04g15600.1	30.2.12	signalling.receptor kinases.leucine rich repeat XII	very weakly similar to (97.4) AT5G20480 | Symbols: EFR | EFR (EF-TU RECEPTOR); ATP binding / kinase/ protein serine/threonine kinase | chr5:6922497-6925679 FORWARD protein|receptor kinase, putative, expressed	T
LOC_Os04g15610.1	35.2	not assigned.unknown	RT_LTR rve protein|retrotransposon protein, putative, Ty3-gypsy subclass, expressed	T
LOC_Os04g15620.1	35.2	not assigned.unknown	Transposase_28 protein|retrotransposon protein, putative, Ty3-gypsy subclass, expressed	T
LOC_Os04g15630.1	30.2.99	signalling.receptor kinases.misc	highly similar to ( 542) AT3G47570 | Symbols: | leucine-rich repeat transmembrane protein kinase, putative | chr3:17527611-17530748 FORWARDmoderately similar to ( 249) PSKR_DAUCA Phytosulfokine receptor precursor (EC 2.7.11.1) (Phytosulfokine LRR receptor kinase) - Daucus carota (Carrot) S_TKc S_TKc Pkinase Pkinase_Tyr TyrKc PTKc PTKc_Srm_Brk PTKc_Jak_rpt2 PTKc_TrkA PTKc_Csk_like PTKc_Trk protein…	T
LOC_Os04g18380.1	26.1	misc.cytochrome P450	moderately similar to ( 364) AT4G37370 | Symbols: CYP81D8 | CYP81D8; electron carrier/ heme binding / iron ion binding / monooxygenase/ oxygen binding | chr4:17569971-17571678 REVERSEmoderately similar to ( 242) C93A3_SOYBN Cytochrome P450 93A3 (EC 1.14.-.-) (P450 CP5) - Glycine max (Soybean) p450 CypX protein|cytochrome P450, putative, expressed	T
LOC_Os04g19750.1	29.5.11.4.3.2	protein.degradation.ubiquitin.E3.SCF.FBOX	very weakly similar to (81.3) AT1G16930 | Symbols: | F-box family protein | chr1:5789987-5791534 FORWARD protein|OsFBL11 - F-box domain and LRR containing protein, expressed	T
LOC_Os04g20330.1	26.2	misc.UDP glucosyl and glucoronyl transferases	moderately similar to ( 338) AT5G12890 | Symbols: | UDP-glucoronosyl/UDP-glucosyl transferase family protein | chr5:4069658-4071124 REVERSEweakly similar to ( 174) ZOX_PHAVU Zeatin O-xylosyltransferase (EC 2.4.2.40) (Zeatin O-beta-D-xylosyltransferase) - Phaseolus vulgaris (Kidney bean) (French bean) UDPGT protein|UDP-glucoronosyl/UDP-glucosyl transferase, putative, expressed	T
LOC_Os04g20400.1	26.2	misc.UDP glucosyl and glucoronyl transferases	moderately similar to ( 251) AT5G12890 | Symbols: | UDP-glucoronosyl/UDP-glucosyl transferase family protein | chr5:4069658-4071124 REVERSEweakly similar to ( 110) ZOX_PHAVU Zeatin O-xylosyltransferase (EC 2.4.2.40) (Zeatin O-beta-D-xylosyltransferase) - Phaseolus vulgaris (Kidney bean) (French bean) protein|cytokinin-O-glucosyltransferase 1, putative, expressed	T
LOC_Os04g20880.1	16.7	secondary metabolism.wax	weakly similar to ( 151) AT5G55350 | Symbols: | membrane bound O-acyl transferase (MBOAT) family protein / wax synthase-related | chr5:22442356-22443393 REVERSE protein|wax synthase isoform 1, putative, expressed	T
LOC_Os04g22110.1	35.2	not assigned.unknown	weakly similar to ( 141) ATMG00860 | Symbols: ORF158 | hypothetical protein | chrM:235916-236392 FORWARDRT_LTR RT_ZFREV_like protein|retrotransposon protein, putative, unclassified, expressed	T
LOC_Os04g23600.1	30.2.24	signalling.receptor kinases.S-locus glycoprotein like	moderately similar to ( 274) AT4G32300 | Symbols: SD2-5 | SD2-5 (S-DOMAIN-2 5); carbohydrate binding / kinase/ protein kinase | chr4:15599970-15602435 FORWARDweakly similar to ( 181) KPRO_MAIZE Putative receptor protein kinase ZmPK1 precursor (EC 2.7.11.1) - Zea mays (Maize) TyrKc Pkinase_Tyr S_TKc PTKc Pkinase S_TKc PTKc_Csk_like PTKc_Jak_rpt2 PTKc_EGFR_like PTKc_Src_like PTKc_EphR SPS1 PTKc_Axl…	T
LOC_Os04g25060.1	35.2	not assigned.unknown	protein|cysteine-rich receptor-like protein kinase, putative, expressed	T
LOC_Os04g25960.1	35.2	not assigned.unknown	weakly similar to ( 114) AT4G31880 | Symbols: | LOCATED IN: cytosol, chloroplast; EXPRESSED IN: 24 plant structures; EXPRESSED DURING: 14 growth stages; BEST Arabidopsis thaliana protein match is: binding (TAIR:AT1G15940.1); Has 114836 Blast hits to 56273 proteins in 1914 species: Archae - 187; Bacteria - 15478; Metazoa - 53116; Fungi - 16017; Plants - 4342; Viruses - 719; Other Eukaryotes - 2497…	T
LOC_Os04g27350.1	35.2	not assigned.unknown	protein|retrotransposon protein, putative, LINE subclass	T
LOC_Os04g27680.1	35.2	not assigned.unknown	protein|retrotransposon protein, putative, Ty3-gypsy subclass, expressed	T
LOC_Os04g32480.1	27.3.7	RNA.regulation of transcription.C2C2(Zn) CO-like, Constans-like zinc finger family	protein|zinc-finger protein, putative, expressed	T
LOC_Os04g32790.1	17.5.2	hormone metabolism.ethylene.signal transduction	very weakly similar to (89.7) AT1G28160 | Symbols: | ethylene-responsive element-binding family protein | chr1:9839387-9840124 FORWARDAP2 AP2 protein|AP2 domain containing protein, expressed	T
LOC_Os04g33370.1	26.1	misc.cytochrome P450	highly similar to ( 507) AT5G04660 | Symbols: CYP77A4 | CYP77A4; electron carrier/ heme binding / iron ion binding / monooxygenase/ oxygen binding | chr5:1336049-1337587 FORWARDmoderately similar to ( 500) C77A2_SOLME Cytochrome P450 77A2 (EC 1.14.-.-) (CYPLXXVIIA2) (P-450EG5) - Solanum melongena (Eggplant) (Aubergine) p450 CypX protein|cytochrome P450, putative, expressed	T
LOC_Os04g34030.1	27.3.64	RNA.regulation of transcription.PHOR1	moderately similar to ( 219) AT2G35930 | Symbols: PUB23 | PUB23 (PLANT U-BOX 23); ubiquitin-protein ligase | chr2:15083101-15084336 REVERSEUbox protein|U-box domain-containing protein, putative, expressed	T
LOC_Os04g34120.1	35.2	not assigned.unknown	protein|expressed protein	T
LOC_Os04g34970.1	17.5.2	hormone metabolism.ethylene.signal transduction	AP2 AP2 protein|AP2 domain containing protein, expressed	T
LOC_Os04g35250.1	27.3.21	RNA.regulation of transcription.GRAS transcription factor family	weakly similar to ( 119) AT1G63100 | Symbols: | scarecrow transcription factor family protein | chr1:23399391-23401367 REVERSEweakly similar to ( 115) GAI1_VITVI DELLA protein GAI1 (Gibberellic acid-insensitive mutant protein 1) (VvGAI1) - Vitis vinifera (Grape)GRAS protein|MONOCULM 1, putative, expressed	T
LOC_Os04g35390.1	35.2	not assigned.unknown	protein|expressed protein	T
LOC_Os04g38360.1	35.2	not assigned.unknown	weakly similar to ( 172) AT4G39730 | Symbols: | lipid-associated family protein | chr4:18432950-18433581 FORWARDPLAT_plant_stress protein|wound/stress protein, putative, expressed	T
LOC_Os04g38885.1	35.2	not assigned.unknown	protein|expressed protein	T
LOC_Os04g39010.1	35.2	not assigned.unknown	protein|heavy metal associated domain containing protein, expressed	T
LOC_Os04g39360.1	35.2	not assigned.unknown	protein|heavy metal transport/detoxification protein, putative, expressed	T
LOC_Os04g39864.1	26.3	misc.gluco-, galacto- and mannosidases	highly similar to ( 530) AT5G44640 | Symbols: BGLU13 | BGLU13 (BETA GLUCOSIDASE 13); catalytic/ cation binding / hydrolase, hydrolyzing O-glycosyl compounds | chr5:18011146-18012669 FORWARDmoderately similar to ( 439) BGLC_MAIZE Beta-glucosidase, chloroplast precursor (EC 3.2.1.21) (Gentiobiase) (Cellobiase) (Beta-D-glucoside glucohydrolase) - Zea mays (Maize) Glyco_hydro_1 BglB celA PRK09852 arb…	T
LOC_Os04g39864.2	26.3	misc.gluco-, galacto- and mannosidases	highly similar to ( 530) AT5G44640 | Symbols: BGLU13 | BGLU13 (BETA GLUCOSIDASE 13); catalytic/ cation binding / hydrolase, hydrolyzing O-glycosyl compounds | chr5:18011146-18012669 FORWARDmoderately similar to ( 439) BGLC_MAIZE Beta-glucosidase, chloroplast precursor (EC 3.2.1.21) (Gentiobiase) (Cellobiase) (Beta-D-glucoside glucohydrolase) - Zea mays (Maize) Glyco_hydro_1 BglB celA PRK09852 arb…	T
LOC_Os04g39864.3	26.3	misc.gluco-, galacto- and mannosidases	moderately similar to ( 439) AT5G44640 | Symbols: BGLU13 | BGLU13 (BETA GLUCOSIDASE 13); catalytic/ cation binding / hydrolase, hydrolyzing O-glycosyl compounds | chr5:18011146-18012669 FORWARDmoderately similar to ( 370) BGLC_MAIZE Beta-glucosidase, chloroplast precursor (EC 3.2.1.21) (Gentiobiase) (Cellobiase) (Beta-D-glucoside glucohydrolase) - Zea mays (Maize) Glyco_hydro_1 BglB celA PRK09852…	T
LOC_Os04g39864.4	26.3	misc.gluco-, galacto- and mannosidases	highly similar to ( 577) AT5G44640 | Symbols: BGLU13 | BGLU13 (BETA GLUCOSIDASE 13); catalytic/ cation binding / hydrolase, hydrolyzing O-glycosyl compounds | chr5:18011146-18012669 FORWARDmoderately similar to ( 475) BGLC_MAIZE Beta-glucosidase, chloroplast precursor (EC 3.2.1.21) (Gentiobiase) (Cellobiase) (Beta-D-glucoside glucohydrolase) - Zea mays (Maize) Glyco_hydro_1 BglB celA PRK09852 arb…	T
LOC_Os04g40410.1	34.4	transport.nitrate	weakly similar to ( 111) AT5G50200 | Symbols: WR3, ATNRT3.1, NRT3.1 | WR3 (WOUND-RESPONSIVE 3); nitrate transmembrane transporter | chr5:20436612-20437535 FORWARD protein|high affinity nitrate transporter, putative, expressed	T
LOC_Os04g41370.1	20.1.7	stress.biotic.PR-proteins	moderately similar to ( 257) AT3G14470 | Symbols: | disease resistance protein (NBS-LRR class), putative | chr3:4857940-4861104 FORWARD NB-ARC protein|Leucine Rich Repeat family protein, expressed	T
LOC_Os04g41380.1	20.1.7	stress.biotic.PR-proteins	moderately similar to ( 216) AT5G45500 | Symbols: | unknown protein | chr5:18432636-18434951 REVERSE protein|Leucine Rich Repeat family protein, expressed	T
LOC_Os04g42240.1	35.2	not assigned.unknown	protein|expressed protein	T
LOC_Os04g43580.1	30.11	signalling.light	moderately similar to ( 202) AT2G31160 | Symbols: LSH3 | LSH3 (LIGHT SENSITIVE HYPOCOTYLS 3) | chr2:13277903-13278562 FORWARDDUF640 protein|DUF640 domain containing protein, putative, expressed	T
LOC_Os04g43580.2	30.11	signalling.light	moderately similar to ( 202) AT2G31160 | Symbols: LSH3 | LSH3 (LIGHT SENSITIVE HYPOCOTYLS 3) | chr2:13277903-13278562 FORWARDDUF640 protein|DUF640 domain containing protein, putative, expressed	T
LOC_Os04g44150.1	17.5.1	hormone metabolism.ethylene.synthesis-degradation	moderately similar to ( 340) AT4G21200 | Symbols: ATGA2OX8, GA2OX8 | GA2OX8 (GIBBERELLIN 2-OXIDASE 8); gibberellin 2-beta-dioxygenase | chr4:11302751-11304032 FORWARDweakly similar to ( 138) GAO1D_WHEAT Gibberellin 20 oxidase 1-D (EC 1.14.11.-) (Gibberellin C-20 oxidase 1-D) (GA 20-oxidase 1-D) (Ta20ox1D) (TaGA20ox1-D) (Protein Wga20) - Triticum aestivum (Wheat) PcbC 2OG-FeII_Oxy protein|gibberel…	T
LOC_Os04g44600.1	35.2	not assigned.unknown	protein|CRP1 - Cysteine-rich family protein precursor, expressed	T
LOC_Os04g45100.1	35.2	not assigned.unknown	protein|expressed protein	T
LOC_Os04g45510.1	35.2	not assigned.unknown	protein|expressed protein	T
LOC_Os04g47170.1	30.5	signalling.G-proteins	moderately similar to ( 439) AT1G01700 | Symbols: ATROPGEF2, ROPGEF2 | ROPGEF2; Rho guanyl-nucleotide exchange factor/ protein binding | chr1:259495-261474 REVERSEPRONE protein|ATROPGEF7/ROPGEF7, putative, expressed	T
LOC_Os04g48200.1	26.1	misc.cytochrome P450	moderately similar to ( 470) AT1G12740 | Symbols: CYP87A2 | CYP87A2; electron carrier/ heme binding / iron ion binding / monooxygenase/ oxygen binding | chr1:4342462-4344569 FORWARDmoderately similar to ( 493) C87A3_ORYSA Cytochrome P450 87A3 (EC 1.14.-.-) - Oryza sativa (Rice) p450 CypX protein|cytochrome P450, putative, expressed	T
LOC_Os04g48350.1	27.3.3	RNA.regulation of transcription.AP2/EREBP, APETALA2/Ethylene-responsive element binding protein family	weakly similar to ( 120) AT4G25480 | Symbols: DREB1A, CBF3, ATCBF3 | DREB1A (DEHYDRATION RESPONSE ELEMENT B1A); DNA binding / transcription activator/ transcription factor | chr4:13018353-13019003 REVERSEAP2 AP2 protein|dehydration-responsive element-binding protein, putative, expressed	T
LOC_Os04g49170.1	35.2	not assigned.unknown	protein|zinc finger, C3HC4 type domain containing protein, expressed	T
LOC_Os04g49210.1	17.5.1	hormone metabolism.ethylene.synthesis-degradation	moderately similar to ( 410) AT4G10500 | Symbols: | oxidoreductase, 2OG-Fe(II) oxygenase family protein | chr4:6491089-6492342 FORWARDweakly similar to ( 199) FL3H_DIACA Naringenin,2-oxoglutarate 3-dioxygenase (EC 1.14.11.9) (Flavonone-3-hydroxylase) (F3H) (FHT) - Dianthus caryophyllus (Carnation) (Clove pink) PcbC 2OG-FeII_Oxy protein|naringenin,2-oxoglutarate 3-dioxygenase, putative, expressed	T
LOC_Os04g49250.1	10.1.4	cell wall.precursor synthesis.UGD	weakly similar to ( 118) AT5G15490 | Symbols: | UDP-glucose 6-dehydrogenase, putative | chr5:5027872-5029314 REVERSEweakly similar to ( 114) UGDH_SOYBN UDP-glucose 6-dehydrogenase (EC 1.1.1.22) (UDP-Glc dehydrogenase) (UDP-GlcDH) (UDPGDH) - Glycine max (Soybean) protein|UDP-glucose/GDP-mannose dehydrogenase family, central domain containing protein, expressed	T
LOC_Os04g50212.1	34.8	transport.metabolite transporters at the envelope membrane	weakly similar to ( 117) AT4G32390 | Symbols: | phosphate translocator-related | chr4:15636550-15637602 FORWARD protein|expressed protein	T
LOC_Os04g52310.1	34.12	transport.metal	moderately similar to ( 274) AT3G12750 | Symbols: ZIP1 | ZIP1 (ZINC TRANSPORTER 1 PRECURSOR); zinc ion transmembrane transporter | chr3:4051950-4053156 REVERSE Zip protein|metal cation transporter, putative, expressed	T
LOC_Os04g53050.1	20.1.7	stress.biotic.PR-proteins	moderately similar to ( 229) AT3G14470 | Symbols: | disease resistance protein (NBS-LRR class), putative | chr3:4857940-4861104 FORWARD NB-ARC protein|disease resistance RPP13-like protein 1, putative, expressed	T
LOC_Os04g53060.1	35.2	not assigned.unknown	protein|NBS-LRR disease resistance protein, putative, expressed	T
LOC_Os04g54610.1	35.2	not assigned.unknown	protein|expressed protein	T
LOC_Os04g55100.1	35.2	not assigned.unknown	protein|expressed protein	T
LOC_Os04g55950.1	27.3.40	RNA.regulation of transcription.Aux/IAA family	very weakly similar to (80.9) AT5G57420 | Symbols: IAA33 | IAA33 (INDOLE-3-ACETIC ACID INDUCIBLE 33); transcription factor | chr5:23270024-23270959 FORWARD protein|expressed protein	T
LOC_Os04g56000.1	35.2	not assigned.unknown	protein|AGAP001055-PA, putative, expressed	T
LOC_Os04g56170.1	33.3	development.squamosa promoter binding like (SPL)	weakly similar to ( 138) AT1G02065 | Symbols: SPL8 | SPL8 (SQUAMOSA PROMOTER BINDING PROTEIN-LIKE 8); DNA binding | chr1:365625-367149 FORWARDmoderately similar to ( 379) LG1_MAIZE LIGULELESS1 protein - Zea mays (Maize)SBP protein|OsSPL8 - SBP-box gene family member, expressed	T
LOC_Os04g58090.1	20.1	stress.biotic	weakly similar to ( 125) AT1G65690 | Symbols: | harpin-induced protein-related / HIN1-related / harpin-responsive protein-related | chr1:24431642-24432898 REVERSEHin1 protein|harpin-induced protein 1 domain containing protein, expressed	T
LOC_Os04g59420.1	35.2	not assigned.unknown	protein|expressed protein	T
LOC_Os04g59420.2	35.2	not assigned.unknown	protein|expressed protein	T
LOC_Os05g01140.1	17.8.1	hormone metabolism.salicylic acid.synthesis-degradation	weakly similar to ( 169) AT5G38020 | Symbols: | S-adenosyl-L-methionine:carboxyl methyltransferase family protein | chr5:15165953-15167612 REVERSEweakly similar to ( 155) BAMT_ANTMA Benzoate carboxyl methyltransferase (EC 2.1.1.-) (S-adenosyl-L-methionine:benzoic acid carboxyl methyltransferase) - Antirrhinum majus (Garden snapdragon)Methyltransf_7 protein|methyltransferase, putative, expressed	T
LOC_Os05g01256.1	27.3.6	RNA.regulation of transcription.bHLH,Basic Helix-Loop-Helix family	weakly similar to ( 155) AT5G50915 | Symbols: | basic helix-loop-helix (bHLH) family protein | chr5:20710764-20712252 REVERSE protein|helix-loop-helix DNA-binding domain containing protein, expressed	T
LOC_Os05g01256.2	27.3.6	RNA.regulation of transcription.bHLH,Basic Helix-Loop-Helix family	weakly similar to ( 155) AT5G50915 | Symbols: | basic helix-loop-helix (bHLH) family protein | chr5:20710764-20712252 REVERSE protein|helix-loop-helix DNA-binding domain containing protein, expressed	T
LOC_Os05g02760.1	35.2	not assigned.unknown	protein|expressed protein	T
LOC_Os05g03960.1	35.2	not assigned.unknown	protein|expressed protein	T
LOC_Os05g05080.1	35.2	not assigned.unknown	protein|expressed protein	T
LOC_Os05g05510.1	35.2	not assigned.unknown	protein|expressed protein	T
LOC_Os05g05900.1	35.2	not assigned.unknown	protein|retrotransposon protein, putative, Ty3-gypsy subclass, expressed	T
LOC_Os05g07120.1	35.2	not assigned.unknown	protein|basic helix-loop-helix, putative, expressed	T
LOC_Os05g07120.2	35.2	not assigned.unknown	protein|basic helix-loop-helix, putative, expressed	T
LOC_Os05g07450.1	30.2.24	signalling.receptor kinases.S-locus glycoprotein like	highly similar to ( 551) AT2G19130 | Symbols: | S-locus lectin protein kinase family protein | chr2:8293789-8296275 FORWARDmoderately similar to ( 238) KPRO_MAIZE Putative receptor protein kinase ZmPK1 precursor (EC 2.7.11.1) - Zea mays (Maize) Pkinase S_TKc S_TKc TyrKc Pkinase_Tyr PTKc PTKc_Frk_like PTKc_EphR PTKc_Src_like PTKc_Csk_like SPS1 PTKc_Trk PTKc_Srm_Brk PTKc_Lck_Blk PTKc_Itk PTKc_DDR P…	T
LOC_Os05g09280.1	35.2	not assigned.unknown	moderately similar to ( 325) AT5G12010 | Symbols: | unknown protein | chr5:3877975-3879483 REVERSE protein|AGAP006957-PA, putative, expressed	T
LOC_Os05g11610.1	35.2	not assigned.unknown	protein|expressed protein	T
LOC_Os05g12030.1	35.2	not assigned.unknown	protein|expressed protein	T
LOC_Os05g12330.1	35.2	not assigned.unknown	moderately similar to ( 278) AT5G41850 | Symbols: | unknown protein | chr5:16756698-16757791 REVERSE COG3571 protein|uncharacterized protein KIAA1310, putative, expressed	T
LOC_Os05g14260.1	26.12	misc.peroxidases	moderately similar to ( 202) AT3G17070 | Symbols: | peroxidase, putative | chr3:5821048-5823165 FORWARDweakly similar to ( 130) PER1_ARAHY Cationic peroxidase 1 precursor (EC 1.11.1.7) (PNPC1) - Arachis hypogaea (Peanut)secretory_peroxidase plant_peroxidase peroxidase protein|peroxidase precursor, putative, expressed	T
LOC_Os05g15350.1	35.2	not assigned.unknown	protein|expressed protein	T
LOC_Os05g23410.1	35.2	not assigned.unknown	protein|expressed protein	T
LOC_Os05g24500.1	16.1.5	secondary metabolism.isoprenoids.terpenoids	weakly similar to ( 112) AT5G44630 | Symbols: | terpene synthase/cyclase family protein | chr5:18003280-18005616 FORWARDweakly similar to ( 143) DCS1_GOSHI (+)-delta-cadinene synthase (EC 4.2.3.13) (D-cadinene synthase) - Gossypium hirsutum (Upland cotton)Terpene_cyclase_plant_C1 Terpene_synth protein|terpene synthase, N-terminal domain containing protein, expressed	T
LOC_Os05g24520.1	16.1.5	secondary metabolism.isoprenoids.terpenoids	weakly similar to ( 116) AT1G70080 | Symbols: | terpene synthase/cyclase family protein | chr1:26394669-26397565 REVERSEweakly similar to ( 132) DCS1_GOSHI (+)-delta-cadinene synthase (EC 4.2.3.13) (D-cadinene synthase) - Gossypium hirsutum (Upland cotton)RT_LTR Terpene_cyclase_plant_C1 Terpene_synth_C Terpene_cyclase_C1 protein|retrotransposon protein, putative, Ty3-gypsy subclass, expressed	T
LOC_Os05g24530.1	35.2	not assigned.unknown	protein|retrotransposon protein, putative, Ty3-gypsy subclass, expressed	T
LOC_Os05g24710.1	30.2.17	signalling.receptor kinases.DUF 26	weakly similar to ( 169) AT4G23160 | Symbols: | protein kinase family protein | chr4:12129485-12134086 FORWARDmoderately similar to ( 217) POLX_TOBAC Retrovirus-related Pol polyprotein from transposon TNT 1-94 [Includes: Protease (EC 3.4.23.-); Reverse transcriptase (EC 2.7.7.49); Endonuclease] - Nicotiana tabacum (Common tobacco)RVT_2 protein|retrotransposon protein, putative, Ty1-copia subclass…	T
LOC_Os05g25920.1	35.2	not assigned.unknown	protein|expressed protein	T
LOC_Os05g30890.1	26.1	misc.cytochrome P450	highly similar to ( 528) AT3G14690 | Symbols: CYP72A15 | CYP72A15; electron carrier/ heme binding / iron ion binding / monooxygenase/ oxygen binding | chr3:4937410-4939310 FORWARDmoderately similar to ( 483) C72A1_CATRO Cytochrome P450 72A1 (EC 1.3.3.9) (CYPLXXII) (Secologanin synthase) (SLS) - Catharanthus roseus (Rosy periwinkle) (Madagascar periwinkle) p450 CypX protein|cytochrome P450, putati…	T
LOC_Os05g31890.1	35.2	not assigned.unknown	protein|aspartyl protease family protein, putative, expressed	T
LOC_Os05g33670.1	35.2	not assigned.unknown	protein|expressed protein	T
LOC_Os05g33830.1	35.2	not assigned.unknown	protein|zinc finger, C3HC4 type domain containing protein, expressed	T
LOC_Os05g34530.1	35.2	not assigned.unknown	protein|auxin-inducible protein, putative, expressed	T
LOC_Os05g36900.1	27.3.8	RNA.regulation of transcription.C2C2(Zn) DOF zinc finger family	weakly similar to ( 126) AT3G52440 | Symbols: | Dof-type zinc finger domain-containing protein | chr3:19435447-19436190 FORWARDweakly similar to ( 115) PBF_MAIZE Dof zinc finger protein PBF (Prolamin box-binding factor) - Zea mays (Maize)zf-Dof protein|dof zinc finger domain containing protein, putative, expressed	T
LOC_Os05g37000.1	35.2	not assigned.unknown	protein|expressed protein	T
LOC_Os05g37600.1	11.3	lipid metabolism.Phospholipid synthesis	highly similar to ( 518) AT2G38110 | Symbols: ATGPAT6, GPAT6 | GPAT6 (GLYCEROL-3-PHOSPHATE ACYLTRANSFERASE 6); 1-acylglycerol-3-phosphate O-acyltransferase/ acyltransferase | chr2:15952816-15955364 REVERSE protein|glycerol-3-phosphate acyltransferase, putative, expressed	T
LOC_Os05g37920.1	35.2	not assigned.unknown	protein|expressed protein	T
LOC_Os05g38300.1	35.2	not assigned.unknown	protein|expressed protein	T
LOC_Os05g38880.1	35.2	not assigned.unknown	protein|expressed protein	T
LOC_Os05g38940.1	35.2	not assigned.unknown	protein|expressed protein	T
LOC_Os05g39790.1	30.11	signalling.light	weakly similar to ( 173) AT4G38180 | Symbols: FRS5 | FRS5 (FAR1-related sequence 5); zinc ion binding | chr4:17906702-17909404 REVERSEFAR1 protein|transposon protein, putative, unclassified, expressed	T
LOC_Os05g39880.1	35.2	not assigned.unknown	protein|expressed protein	T
LOC_Os05g43510.1	16.4.1	secondary metabolism.N misc.alkaloid-like	moderately similar to ( 427) AT2G20340 | Symbols: | tyrosine decarboxylase, putative | chr2:8779804-8782490 FORWARDmoderately similar to ( 468) TYDC2_PETCR Tyrosine decarboxylase 2 (EC 4.1.1.25) - Petroselinum crispum (Parsley) (Petroselinum hortense) Pyridoxal_deC GadB protein|decarboxylase, putative, expressed	T
LOC_Os05g43590.1	29.5.5	protein.degradation.serine protease	weakly similar to ( 184) AT3G45220 | Symbols: | serpin, putative / serine protease inhibitor, putative | chr3:16564881-16566330 REVERSEweakly similar to ( 185) PRTZ_HORVU Protein Z (Z4) (Major endosperm albumin) - Hordeum vulgare (Barley) plant_SERPIN SERPIN Serpin bacterial_SERPIN SERPIN COG4826 alpha-1-antitrypsin_like PAI-2 ovalbumin_like ov-serpin antithrombin-III_like PAI-1_nexin-1 neuroserp…	T
LOC_Os05g43660.1	35.2	not assigned.unknown	protein|expressed protein	T
LOC_Os05g43930.1	26.6	misc.O-methyl transferases	weakly similar to ( 180) AT4G35160 | Symbols: | O-methyltransferase family 2 protein | chr4:16730989-16732808 REVERSEmoderately similar to ( 452) ZRP4_MAIZE O-methyltransferase ZRP4 (EC 2.1.1.-) (OMT) - Zea mays (Maize) Methyltransf_2 protein|O-methyltransferase, putative, expressed	T
LOC_Os05g44960.1	30.2.99	signalling.receptor kinases.misc	moderately similar to ( 436) AT1G51850 | Symbols: | leucine-rich repeat protein kinase, putative | chr1:19252964-19256783 REVERSEmoderately similar to ( 266) NORK_MEDTR Nodulation receptor kinase precursor (EC 2.7.11.1) (Does not make infections protein 2) (Symbiosis receptor-like kinase) (MtSYMRK) - Medicago truncatula (Barrel medic) Pkinase_Tyr TyrKc S_TKc PTKc Pkinase S_TKc PTKc_Csk_like PTKc_…	T
LOC_Os05g45330.1	35.2	not assigned.unknown	protein|expressed protein	T
LOC_Os05g47750.1	30.2.20	signalling.receptor kinases.wheat LRK10 like	weakly similar to ( 143) AT5G38260 | Symbols: | serine/threonine protein kinase, putative | chr5:15283692-15285837 REVERSE protein|Ser/Thr protein kinase, putative, expressed	T
LOC_Os05g47860.1	35.2	not assigned.unknown	protein|expressed protein	T
LOC_Os05g49100.1	27.3.32	RNA.regulation of transcription.WRKY domain transcription factor family	weakly similar to ( 143) AT4G18170 | Symbols: WRKY28, ATWRKY28 | WRKY28; transcription factor | chr4:10061508-10062691 FORWARDWRKY protein|WRKY49, expressed	T
LOC_Os05g49700.1	27.3.3	RNA.regulation of transcription.AP2/EREBP, APETALA2/Ethylene-responsive element binding protein family	weakly similar to ( 110) AT4G39780 | Symbols: | AP2 domain-containing transcription factor, putative | chr4:18458216-18459034 REVERSEAP2 AP2 protein|AP2 domain containing protein, expressed	T
LOC_Os05g49810.1	35.2	not assigned.unknown	weakly similar to ( 179) AT2G27430 | Symbols: | binding | chr2:11729914-11733170 REVERSE protein|armadillo/beta-catenin-like repeat containing protein, expressed	T
LOC_Os05g49960.1	35.2	not assigned.unknown	protein|expressed protein	T
LOC_Os05g50700.1	27.3.32	RNA.regulation of transcription.WRKY domain transcription factor family	weakly similar to ( 126) AT5G52830 | Symbols: WRKY27, ATWRKY27 | WRKY27; transcription factor | chr5:21410996-21412218 FORWARDWRKY protein|WRKY111, expressed	T
LOC_Os06g01960.1	35.2	not assigned.unknown	protein|retrotransposon protein, putative, unclassified, expressed	T
LOC_Os06g02780.1	27.3.99	RNA.regulation of transcription.unclassified	weakly similar to ( 191) AT5G10770 | Symbols: | chloroplast nucleoid DNA-binding protein, putative | chr5:3403331-3405331 REVERSE protein|aspartic protease, putative, expressed	T
LOC_Os06g02800.1	35.2	not assigned.unknown	protein|expressed protein	T
LOC_Os06g02810.1	35.2	not assigned.unknown	protein|expressed protein	T
LOC_Os06g03050.1	35.2	not assigned.unknown	protein|expressed protein	T
LOC_Os06g03670.1	27.3.3	RNA.regulation of transcription.AP2/EREBP, APETALA2/Ethylene-responsive element binding protein family	weakly similar to ( 107) AT4G25480 | Symbols: DREB1A, CBF3, ATCBF3 | DREB1A (DEHYDRATION RESPONSE ELEMENT B1A); DNA binding / transcription activator/ transcription factor | chr4:13018353-13019003 REVERSEAP2 AP2 protein|dehydration-responsive element-binding protein, putative, expressed	T
LOC_Os06g04900.1	34.2	transport.sugars	moderately similar to ( 443) AT5G61520 | Symbols: | hexose transporter, putative | chr5:24739358-24740833 REVERSEhighly similar to ( 509) HEX6_RICCO Hexose carrier protein HEX6 - Ricinus communis (Castor bean) Sugar_tr xylE protein|transporter family protein, putative, expressed	T
LOC_Os06g05420.1	35.2	not assigned.unknown	protein|expressed protein	T
LOC_Os06g06450.1	29.5.11.4.2	protein.degradation.ubiquitin.E3.RING	weakly similar to ( 158) AT4G12400 | Symbols: | stress-inducible protein, putative | chr4:7338866-7341239 REVERSEweakly similar to ( 146) STIP_SOYBN Heat shock protein STI (Stress-inducible protein) (GmSTI) - Glycine max (Soybean) Ubox protein|heat shock protein STI, putative, expressed	T
LOC_Os06g07590.1	30.2.3	signalling.receptor kinases.leucine rich repeat III	weakly similar to ( 132) AT1G48480 | Symbols: RKL1 | RKL1; ATP binding / kinase/ protein serine/threonine kinase | chr1:17918475-17920743 FORWARD protein|inactive receptor kinase At2g26730 precursor, putative, expressed	T
LOC_Os06g08190.1	35.2	not assigned.unknown	protein|expressed protein	T
LOC_Os06g10030.1	35.2	not assigned.unknown	protein|expressed protein	T
LOC_Os06g10820.1	35.2	not assigned.unknown	protein|helix-loop-helix DNA-binding domain containing protein, expressed	T
LOC_Os06g11200.1	17.7.1.5	hormone metabolism.jasmonate.synthesis-degradation.12-Oxo-PDA-reductase	highly similar to ( 510) AT1G76680 | Symbols: OPR1, ATOPR1 | OPR1; 12-oxophytodienoate reductase | chr1:28776982-28778271 FORWARD OYE_like_FMN PRK10605 NemA Oxidored_FMN OYE_like_FMN_family OYE_YqiM_FMN OYE_like_4_FMN OYE_like_5_FMN OYE_like_3_FMN OYE_like_2_FMN DCR_FMN PRK08255 ER_like_FMN TMADH_HD_FMN protein|12-oxophytodienoate reductase, putative, expressed	T
LOC_Os06g11830.1	28.99	DNA.unspecified	highly similar to ( 674) AT1G19260 | Symbols: | hAT dimerisation domain-containing protein | chr1:6657260-6659569 REVERSE protein|hAT dimerisation domain-containing protein, putative, expressed	T
LOC_Os06g12090.1	30.5	signalling.G-proteins	moderately similar to ( 254) AT3G62560 | Symbols: | GTP-binding protein, putative | chr3:23137539-23138880 FORWARDmoderately similar to ( 250) SAR1A_BRACM GTP-binding protein SAR1A - Brassica campestris (Field mustard) Sar1 SAR Arf Arf_Arl Arl3 Arl2 Arl5_Arl8 Arl1 Arl6 Arl10_like Arf6 Arfrp1 ARLTS1 ARF Arf1_5_like ARD1 Arl2l1_Arl13_like Arl9_Arfrp2_like Arl4_Arl7 COG1100 protein|miro, putative, e…	T
LOC_Os06g13460.1	17.8.1	hormone metabolism.salicylic acid.synthesis-degradation	weakly similar to ( 125) AT4G36470 | Symbols: | S-adenosyl-L-methionine:carboxyl methyltransferase family protein | chr4:17215128-17216475 REVERSEweakly similar to ( 112) BAMT_ANTMA Benzoate carboxyl methyltransferase (EC 2.1.1.-) (S-adenosyl-L-methionine:benzoic acid carboxyl methyltransferase) - Antirrhinum majus (Garden snapdragon)Methyltransf_7 protein|SAM dependent carboxyl methyltransferase…	T
LOC_Os06g17920.1	20.1.7	stress.biotic.PR-proteins	moderately similar to ( 283) AT3G07040 | Symbols: RPM1, RPS3 | RPM1 (RESISTANCE TO P. SYRINGAE PV MACULICOLA 1); nucleotide binding / protein binding | chr3:2226244-2229024 REVERSE NB-ARC protein|NBS-LRR disease resistance protein, putative, expressed	T
LOC_Os06g18780.1	35.2	not assigned.unknown	Transposase_21 protein|transposon protein, putative, CACTA, En/Spm sub-class, expressed	T
LOC_Os06g20820.1	35.2	not assigned.unknown	protein|expressed protein	T
LOC_Os06g21240.1	35.2	not assigned.unknown	protein|glycine rich protein family protein, putative, expressed	T
LOC_Os06g23260.1	35.2	not assigned.unknown	protein|transposon protein, putative, CACTA, En/Spm sub-class, expressed	T
LOC_Os06g25010.1	20.1	stress.biotic	weakly similar to ( 123) AT5G24090 | Symbols: | acidic endochitinase (CHIB1) | chr5:8143805-8145153 REVERSEmoderately similar to ( 324) XIP1_WHEAT Xylanase inhibitor protein 1 precursor (Class III chitinase homolog) (XIP-I protein) - Triticum aestivum (Wheat) protein|glycosyl hydrolase, putative, expressed	T
LOC_Os06g25470.1	35.2	not assigned.unknown	protein|expressed protein	T
LOC_Os06g27860.1	35.2	not assigned.unknown	protein|poor homologous synapsis 1 protein, putative, expressed	T
LOC_Os06g30370.1	33.99	development.unspecified	moderately similar to ( 204) AT1G18100 | Symbols: E12A11 | E12A11; phosphatidylethanolamine binding | chr1:6228049-6230110 REVERSEweakly similar to ( 148) CEN_ANTMA Protein CENTRORADIALIS - Antirrhinum majus (Garden snapdragon) RKIP PBP PEBP_RKIP protein|osMFT1 MFT-Like1 homologous to Mother of FT and TFL1 gene; contains Pfam profile PF01161: Phosphatidylethanolamine-binding protein, expressed	T
LOC_Os06g30640.1	26.1	misc.cytochrome P450	moderately similar to ( 346) AT2G45570 | Symbols: CYP76C2 | CYP76C2; electron carrier/ heme binding / iron ion binding / monooxygenase/ oxygen binding | chr2:18779935-18781922 REVERSEmoderately similar to ( 281) C76A2_SOLME Cytochrome P450 76A2 (EC 1.14.-.-) (CYPLXXVIA2) (P-450EG7) - Solanum melongena (Eggplant) (Aubergine) p450 CypX protein|cytochrome P450, putative, expressed	T
LOC_Os06g32610.1	35.2	not assigned.unknown	protein|expressed protein	T
LOC_Os06g32720.1	27.3.11	RNA.regulation of transcription.C2H2 zinc finger family	weakly similar to ( 115) AT2G47850 | Symbols: | zinc finger (CCCH-type) family protein | chr2:19595953-19598119 FORWARDweakly similar to ( 117) ZFNL2_ORYSA Zinc finger CCCH domain-containing protein ZFN-like 2 - Oryza sativa (Rice) protein|zinc finger C-x8-C-x5-C-x3-H type family protein, expressed	T
LOC_Os06g32730.1	29.2.3	protein.synthesis.initiation	moderately similar to ( 242) AT5G57870 | Symbols: | eukaryotic translation initiation factor 4F, putative / eIF-4F, putative | chr5:23439755-23443433 FORWARDmoderately similar to ( 286) IF41_WHEAT Eukaryotic initiation factor iso-4F subunit p82-34 (eIF-(iso)4F p82-34) - Triticum aestivum (Wheat) protein|eukaryotic initiation factor iso-4F subunit p82-34, putative, expressed	T
LOC_Os06g32790.1	27.2	RNA.transcription	very weakly similar to (83.2) RRPO_OENBE RNA-directed DNA polymerase homolog (Reverse transcriptase homolog) - Oenothera bertiana (Berteros evening primrose)RT_LTR rve RVT_1 PRK07238 protein|retrotransposon protein, putative, unclassified, expressed	T
LOC_Os06g32860.1	27.3.99	RNA.regulation of transcription.unclassified	moderately similar to ( 208) AT5G57870 | Symbols: | eukaryotic translation initiation factor 4F, putative / eIF-4F, putative | chr5:23439755-23443433 FORWARDmoderately similar to ( 251) IF41_WHEAT Eukaryotic initiation factor iso-4F subunit p82-34 (eIF-(iso)4F p82-34) - Triticum aestivum (Wheat) protein|zinc finger C-x8-C-x5-C-x3-H type family protein, expressed	T
LOC_Os06g32860.2	27.3.99	RNA.regulation of transcription.unclassified	moderately similar to ( 208) AT5G57870 | Symbols: | eukaryotic translation initiation factor 4F, putative / eIF-4F, putative | chr5:23439755-23443433 FORWARDmoderately similar to ( 251) IF41_WHEAT Eukaryotic initiation factor iso-4F subunit p82-34 (eIF-(iso)4F p82-34) - Triticum aestivum (Wheat) protein|zinc finger C-x8-C-x5-C-x3-H type family protein, expressed	T
LOC_Os06g35990.1	35.2	not assigned.unknown	protein|expressed protein	T
LOC_Os06g36000.1	27.3.3	RNA.regulation of transcription.AP2/EREBP, APETALA2/Ethylene-responsive element binding protein family	very weakly similar to ( 100) AT5G11590 | Symbols: TINY2 | TINY2 (TINY2); DNA binding / transcription factor | chr5:3727789-3728499 REVERSEAP2 AP2 protein|AP2 domain containing protein, expressed	T
LOC_Os06g38490.1	30.2.11	signalling.receptor kinases.leucine rich repeat XI	highly similar to ( 605) AT3G47570 | Symbols: | leucine-rich repeat transmembrane protein kinase, putative | chr3:17527611-17530748 FORWARDmoderately similar to ( 357) RPK1_IPONI Receptor-like protein kinase precursor (EC 2.7.11.1) - Ipomoea nil (Japanese morning glory) (Pharbitis nil) S_TKc S_TKc Pkinase PTKc Pkinase_Tyr TyrKc PTKc_Jak_rpt2 PTKc_Trk PTKc_Csk_like PTKc_Src_like PTKc_TrkA PTKc_Srm…	T
LOC_Os06g41870.1	35.2	not assigned.unknown	protein|expressed protein	T
LOC_Os06g42205.1	35.2	not assigned.unknown	protein|expressed protein	T
LOC_Os06g43080.1	35.2	not assigned.unknown	protein|expressed protein	T
LOC_Os06g45890.1	27.3.20	RNA.regulation of transcription.G2-like transcription factor family, GARP	very weakly similar to (99.0) AT2G02060 | Symbols: | transcription factor | chr2:495691-497609 FORWARD protein|MYB family transcription factor, putative, expressed	T
LOC_Os06g46740.1	26.19	misc.plastocyanin-like	weakly similar to ( 120) AT3G20570 | Symbols: | plastocyanin-like domain-containing protein | chr3:7186754-7187453 REVERSECu_bind_like protein|early nodulin 20 precursor, putative, expressed	T
LOC_Os06g46920.1	16.8.3	secondary metabolism.flavonoids.dihydroflavonols	moderately similar to ( 290) AT4G27250 | Symbols: | dihydroflavonol 4-reductase family / dihydrokaempferol 4-reductase family | chr4:13642803-13644425 REVERSEmoderately similar to ( 221) DFRA_DIACA Dihydroflavonol-4-reductase (EC 1.1.1.219) (DFR) (Dihydrokaempferol 4-reductase) - Dianthus caryophyllus (Carnation) (Clove pink) WcaG protein|dihydroflavonol-4-reductase, putative, expressed	T
LOC_Os06g49350.1	30.2.17	signalling.receptor kinases.DUF 26	moderately similar to ( 481) AT4G23160 | Symbols: | protein kinase family protein | chr4:12129485-12134086 FORWARDmoderately similar to ( 370) POLX_TOBAC Retrovirus-related Pol polyprotein from transposon TNT 1-94 [Includes: Protease (EC 3.4.23.-); Reverse transcriptase (EC 2.7.7.49); Endonuclease] - Nicotiana tabacum (Common tobacco)RVT_2 rve protein|retrotransposon protein, putative, unclassifi…	T
LOC_Os06g50530.1	35.2	not assigned.unknown	protein|expressed protein	T
LOC_Os06g50724.1	27.3.22	RNA.regulation of transcription.HB,Homeobox transcription factor family	moderately similar to ( 262) AT1G52150 | Symbols: ATHB-15, ATHB15, CNA, ICU4 | ATHB-15; DNA binding / transcription factor | chr1:19410118-19413961 REVERSESTART START protein|START domain containing protein, expressed	T
LOC_Os07g01600.1	20.1	stress.biotic	Dirigent protein|dirigent, putative, expressed	T
LOC_Os07g02624.1	35.2	not assigned.unknown	protein|expressed protein	T
LOC_Os07g02660.1	20.1	stress.biotic	protein|expressed protein	T
LOC_Os07g02674.1	35.2	not assigned.unknown	protein|expressed protein	T
LOC_Os07g02850.1	35.2	not assigned.unknown	very weakly similar to (96.3) AT1G09310 | Symbols: | unknown protein | chr1:3009109-3009648 FORWARDDUF538 protein|DUF538 domain containing protein, putative, expressed	T
LOC_Os07g02900.1	35.2	not assigned.unknown	very weakly similar to (98.2) AT1G09310 | Symbols: | unknown protein | chr1:3009109-3009648 FORWARDDUF538 protein|DUF538 domain containing protein, putative, expressed	T
LOC_Os07g02920.1	35.2	not assigned.unknown	very weakly similar to (98.2) AT1G09310 | Symbols: | unknown protein | chr1:3009109-3009648 FORWARDDUF538 protein|DUF538 domain containing protein, putative, expressed	T
LOC_Os07g04000.1	29.4	protein.postranslational modification	highly similar to ( 653) AT2G37710 | Symbols: RLK | RLK (receptor lectin kinase); kinase | chr2:15814934-15816961 REVERSEmoderately similar to ( 210) PSKR_DAUCA Phytosulfokine receptor precursor (EC 2.7.11.1) (Phytosulfokine LRR receptor kinase) - Daucus carota (Carrot) Lectin_legB TyrKc S_TKc Pkinase Pkinase_Tyr S_TKc PTKc PTKc_Jak_rpt2 PTKc_Srm_Brk PTKc_EphR PTKc_Csk_like SPS1 PTKc_Tec_like PTK…	T
LOC_Os07g04020.1	35.2	not assigned.unknown	protein|expressed protein	T
LOC_Os07g05350.1	35.2	not assigned.unknown	protein|expressed protein	T
LOC_Os07g05450.1	11.8	lipid metabolism.exotics (steroids, squalene etc)	weakly similar to ( 107) AT4G26280 | Symbols: | sulfotransferase family protein | chr4:13304721-13305722 REVERSE Sulfotransfer_1 protein|sulfotransferase domain containing protein, expressed	T
LOC_Os07g05940.1	17.1.1.1.10	hormone metabolism.abscisic acid.synthesis-degradation.synthesis.9-cis-epoxycarotenoid dioxygenase	highly similar to ( 729) AT1G78390 | Symbols: NCED9, ATNCED9 | NCED9 (NINE-CIS-EPOXYCAROTENOID DIOXYGENASE 9); 9-cis-epoxycarotenoid dioxygenase | chr1:29490895-29492868 REVERSE RPE65 COG3670 protein|9-cis-epoxycarotenoid dioxygenase 1, chloroplast precursor, putative, expressed	T
LOC_Os07g06070.1	35.2	not assigned.unknown	protein|expressed protein	T
LOC_Os07g08080.1	35.2	not assigned.unknown	protein|expressed protein	T
LOC_Os07g08800.1	35.2	not assigned.unknown	protein|expressed protein	T
LOC_Os07g09625.1	35.2	not assigned.unknown	protein|expressed protein	T
LOC_Os07g10190.1	26.2	misc.UDP glucosyl and glucoronyl transferases	moderately similar to ( 327) AT5G65550 | Symbols: | UDP-glucoronosyl/UDP-glucosyl transferase family protein | chr5:26198410-26199810 REVERSEweakly similar to ( 181) UFOG_PETHY Anthocyanidin 3-O-glucosyltransferase (EC 2.4.1.115) (Flavonol 3-O-glucosyltransferase) (UDP-glucose flavonoid 3-O-glucosyltransferase) (Anthocyanin rhamnosyl transferase) - Petunia hybrida (Petunia) UDPGT protein|glucosyl…	T
LOC_Os07g11770.1	35.2	not assigned.unknown	protein|expressed protein	T
LOC_Os07g11790.1	16.1.5	secondary metabolism.isoprenoids.terpenoids	moderately similar to ( 248) AT5G23960 | Symbols: ATTPS21, TPS21 | TPS21 (TERPENE SYNTHASE 21); (-)-E-beta-caryophyllene synthase/ alpha-humulene synthase | chr5:8092969-8095128 FORWARDmoderately similar to ( 316) DCS1_GOSHI (+)-delta-cadinene synthase (EC 4.2.3.13) (D-cadinene synthase) - Gossypium hirsutum (Upland cotton)Terpene_cyclase_plant_C1 Terpene_synth_C Terpene_cyclase_C1 Terpene_synth …	T
LOC_Os07g11870.1	26.1	misc.cytochrome P450	moderately similar to ( 321) AT1G13110 | Symbols: CYP71B7 | CYP71B7; electron carrier/ heme binding / iron ion binding / monooxygenase/ oxygen binding | chr1:4467272-4468857 FORWARDmoderately similar to ( 385) C71DA_SOYBN Cytochrome P450 71D10 (EC 1.14.-.-) - Glycine max (Soybean) p450 CypX protein|cytochrome P450, putative, expressed	T
LOC_Os07g11980.1	35.2	not assigned.unknown	protein|expressed protein	T
LOC_Os07g12240.1	35.2	not assigned.unknown	protein|EF hand family protein, putative, expressed	T
LOC_Os07g12720.1	35.2	not assigned.unknown	protein|expressed protein	T
LOC_Os07g15930.1	29.4	protein.postranslational modification	moderately similar to ( 304) AT5G60270 | Symbols: | lectin protein kinase family protein | chr5:24257761-24259767 FORWARDweakly similar to ( 125) NORK_PEA Nodulation receptor kinase precursor (EC 2.7.11.1) - Pisum sativum (Garden pea) Lectin_legB S_TKc Pkinase S_TKc Pkinase_Tyr PTKc TyrKc protein|legume lectins beta domain containing protein, expressed	T
LOC_Os07g15940.1	29.4	protein.postranslational modification	moderately similar to ( 322) AT3G53810 | Symbols: | lectin protein kinase, putative | chr3:19933153-19935186 REVERSELectin_legB protein|legume lectins beta domain containing protein, expressed	T
LOC_Os07g15970.1	26.1	misc.misc2	moderately similar to ( 352) AT1G72190 | Symbols: | oxidoreductase family protein | chr1:27167458-27169696 REVERSEvery weakly similar to (97.1) FDH2_ORYSA Formate dehydrogenase 2, mitochondrial precursor (EC 1.2.1.2) (NAD-dependent formate dehydrogenase 2) (FDH 2) - Oryza sativa (Rice) 2-Hacid_dh SerA LdhA 2-Hacid_dh_C PRK07574 PRK06487 PRK11790 PRK08410 PRK06932 PRK06436 protein|erythronate-4-ph…	T
LOC_Os07g19090.1	35.2	not assigned.unknown	protein|zinc knuckle domain containing protein, expressed	T
LOC_Os07g19120.1	35.2	not assigned.unknown	protein|retrotransposon protein, putative, unclassified	T
LOC_Os07g19160.1	35.2	not assigned.unknown	protein|expressed protein	T
LOC_Os07g23660.1	35.2	not assigned.unknown	protein|retrotransposon protein, putative, unclassified, expressed	T
LOC_Os07g25050.1	35.2	not assigned.unknown	protein|thionin-like peptide, putative, expressed	T
LOC_Os07g25540.1	26.7	misc.oxidases - copper, flavone etc.	highly similar to ( 525) AT1G04180 | Symbols: | flavin-containing monooxygenase family protein / FMO family protein | chr1:1104623-1105988 FORWARD TrkA FMO-like protein|flavin monooxygenase, putative, expressed	T
LOC_Os07g26550.1	35.2	not assigned.unknown	protein|expressed protein	T
LOC_Os07g26595.1	35.2	not assigned.unknown	protein|expressed protein	T
LOC_Os07g26720.1	27.3.5	RNA.regulation of transcription.ARR	weakly similar to ( 111) AT3G57040 | Symbols: ARR9, ATRR4 | ARR9 (RESPONSE REGULATOR 9); transcription regulator/ two-component response regulator | chr3:21110059-21111228 FORWARD protein|OsRR7 type-A response regulator, expressed	T
LOC_Os07g26720.2	27.3.5	RNA.regulation of transcription.ARR	weakly similar to ( 122) AT3G57040 | Symbols: ARR9, ATRR4 | ARR9 (RESPONSE REGULATOR 9); transcription regulator/ two-component response regulator | chr3:21110059-21111228 FORWARDREC Response_reg PleD CheY COG3437 protein|OsRR7 type-A response regulator, expressed	T
LOC_Os07g28570.1	30.2.11	signalling.receptor kinases.leucine rich repeat XI	weakly similar to ( 199) AT2G34930 | Symbols: | disease resistance family protein | chr2:14737169-14739886 REVERSEweakly similar to ( 110) RPK1_IPONI Receptor-like protein kinase precursor (EC 2.7.11.1) - Ipomoea nil (Japanese morning glory) (Pharbitis nil) protein|leucine rich repeat protein, putative, expressed	T
LOC_Os07g29460.1	30.2.17	signalling.receptor kinases.DUF 26	weakly similar to ( 164) AT4G23160 | Symbols: | protein kinase family protein | chr4:12129485-12134086 FORWARDmoderately similar to ( 221) POLX_TOBAC Retrovirus-related Pol polyprotein from transposon TNT 1-94 [Includes: Protease (EC 3.4.23.-); Reverse transcriptase (EC 2.7.7.49); Endonuclease] - Nicotiana tabacum (Common tobacco)RVT_2 protein|retrotransposon protein, putative, Ty1-copia subclass…	T
LOC_Os07g30690.1	26.2	misc.UDP glucosyl and glucoronyl transferases	moderately similar to ( 234) AT1G22370 | Symbols: AtUGT85A5 | AtUGT85A5 (UDP-glucosyl transferase 85A5); glucuronosyltransferase/ transferase, transferring glycosyl groups | chr1:7898116-7899879 REVERSEweakly similar to ( 139) IAAG_MAIZE Indole-3-acetate beta-glucosyltransferase (EC 2.4.1.121) (IAA-Glu synthetase) ((Uridine 5-diphosphate-glucose:indol-3-ylacetyl)-beta-D-glucosyl transferase) - Ze…	T
LOC_Os07g31070.1	31.1	cell.organisation	weakly similar to ( 123) AT4G03460 | Symbols: | ankyrin repeat family protein | chr4:1536404-1540111 REVERSE protein|expressed protein	T
LOC_Os07g34280.1	24	Biodegradation of Xenobiotics	weakly similar to ( 186) AT1G49640 | Symbols: | hydrolase | chr1:18375697-18376644 REVERSEweakly similar to ( 116) GID1_ORYSA Gibberellin receptor GID1 (EC 3.-.-.-) (Gibberellin-insensitive dwarf protein 1) (Protein GIBBERELLIN INSENSITIVE DWARF1) - Oryza sativa (Rice) Abhydrolase_3 Aes protein|CXE carboxylesterase, putative, expressed	T
LOC_Os07g34370.1	24	Biodegradation of Xenobiotics	weakly similar to ( 189) AT1G47480 | Symbols: | hydrolase | chr1:17417623-17419296 FORWARDvery weakly similar to (84.0) GID1_ORYSA Gibberellin receptor GID1 (EC 3.-.-.-) (Gibberellin-insensitive dwarf protein 1) (Protein GIBBERELLIN INSENSITIVE DWARF1) - Oryza sativa (Rice) Abhydrolase_3 Aes protein|gibberellin receptor, putative, expressed	T
LOC_Os07g35280.1	30.2.24	signalling.receptor kinases.S-locus glycoprotein like	moderately similar to ( 419) AT4G23180 | Symbols: CRK10, RLK4 | CRK10 (CYSTEINE-RICH RLK10); ATP binding / kinase/ protein kinase/ protein serine/threonine kinase/ protein tyrosine kinase | chr4:12138171-12140780 FORWARDweakly similar to ( 184) NORK_MEDTR Nodulation receptor kinase precursor (EC 2.7.11.1) (Does not make infections protein 2) (Symbiosis receptor-like kinase) (MtSYMRK) - Medicago t…	T
LOC_Os07g35500.1	35.2	not assigned.unknown	protein|mucin-associated surface protein, putative, expressed	T
LOC_Os07g36560.1	20.1	stress.biotic	moderately similar to ( 319) AT5G17540 | Symbols: | transferase family protein | chr5:5782061-5783682 REVERSEweakly similar to ( 109) HCBT3_DIACA Anthranilate N-benzoyltransferase protein 3 (EC 2.3.1.144) (Anthranilate N-hydroxycinnamoyl/benzoyltransferase 3) - Dianthus caryophyllus (Carnation) (Clove pink)Transferase protein|transferase family protein, putative, expressed	T
LOC_Os07g37045.1	35.2	not assigned.unknown	protein|expressed protein	T
LOC_Os07g39210.1	35.2	not assigned.unknown	protein|expressed protein	T
LOC_Os07g40810.1	20.1.7	stress.biotic.PR-proteins	moderately similar to ( 291) AT3G07040 | Symbols: RPM1, RPS3 | RPM1 (RESISTANCE TO P. SYRINGAE PV MACULICOLA 1); nucleotide binding / protein binding | chr3:2226244-2229024 REVERSE NB-ARC protein|NBS-LRR type disease resistance protein, putative, expressed	T
LOC_Os07g40830.1	35.2	not assigned.unknown	protein|app1, putative, expressed	T
LOC_Os07g44910.1	24	Biodegradation of Xenobiotics	moderately similar to ( 241) AT5G23530 | Symbols: AtCXE18 | AtCXE18 (Arabidopsis thaliana carboxyesterase 18); carboxylesterase | chr5:7933366-7934373 REVERSEweakly similar to ( 150) GID1_ORYSA Gibberellin receptor GID1 (EC 3.-.-.-) (Gibberellin-insensitive dwarf protein 1) (Protein GIBBERELLIN INSENSITIVE DWARF1) - Oryza sativa (Rice) Abhydrolase_3 Aes protein|gibberellin receptor GID1L2, putati…	T
LOC_Os07g44910.2	24	Biodegradation of Xenobiotics	moderately similar to ( 241) AT5G23530 | Symbols: AtCXE18 | AtCXE18 (Arabidopsis thaliana carboxyesterase 18); carboxylesterase | chr5:7933366-7934373 REVERSEweakly similar to ( 150) GID1_ORYSA Gibberellin receptor GID1 (EC 3.-.-.-) (Gibberellin-insensitive dwarf protein 1) (Protein GIBBERELLIN INSENSITIVE DWARF1) - Oryza sativa (Rice) Abhydrolase_3 Aes protein|gibberellin receptor GID1L2, putati…	T
LOC_Os07g44930.1	20.1.7	stress.biotic.PR-proteins	weakly similar to ( 159) AT1G64160 | Symbols: | disease resistance-responsive family protein / dirigent family protein | chr1:23814063-23814611 FORWARDweakly similar to ( 146) DR206_PEA Disease resistance response protein 206 - Pisum sativum (Garden pea)Dirigent protein|dirigent, putative, expressed	T
LOC_Os07g46920.1	26.22	misc.short chain dehydrogenase/reductase (SDR)	moderately similar to ( 259) AT4G03140 | Symbols: | binding / catalytic/ oxidoreductase | chr4:1392191-1393662 FORWARDweakly similar to ( 189) TS2_MAIZE Sex determination protein tasselseed-2 - Zea mays (Maize) PRK12429 fabG fabG PRK07479 PRK08324 PRK06172 PRK06057 PRK06841 fabG PRK12826 PRK07063 PRK06138 PRK12829 PRK07067 PRK08220 fabG PRK06346 PRK07478 PRK06500 FabG PRK06484 fabG COG4221 PRK082…	T
LOC_Os07g47010.1	29.4	protein.postranslational modification	weakly similar to ( 108) AT1G48120 | Symbols: | calcineurin-like phosphoesterase family protein | chr1:17774238-17779624 REVERSEDUF1723 protein|transposon protein, putative, unclassified, expressed	T
LOC_Os07g48710.1	35.2	not assigned.unknown	protein|VQ domain containing protein, putative, expressed	T
LOC_Os08g02590.1	35.2	not assigned.unknown	protein|expressed protein	T
LOC_Os08g03825.1	35.2	not assigned.unknown	protein|expressed protein	T
LOC_Os08g04560.1	16.4.1	secondary metabolism.N misc.alkaloid-like	moderately similar to ( 427) AT2G20340 | Symbols: | tyrosine decarboxylase, putative | chr2:8779804-8782490 FORWARDmoderately similar to ( 474) DDC_CATRO Aromatic-L-amino-acid decarboxylase (EC 4.1.1.28) (AADC) (DOPA decarboxylase) (Tryptophan decarboxylase) - Catharanthus roseus (Rosy periwinkle) (Madagascar periwinkle) Pyridoxal_deC GadB protein|decarboxylase, putative, expressed	T
LOC_Os08g07080.1	16.1.5	secondary metabolism.isoprenoids.terpenoids	moderately similar to ( 240) AT3G14520 | Symbols: | terpene synthase/cyclase family protein | chr3:4875868-4878243 REVERSEmoderately similar to ( 314) DCS1_GOSHI (+)-delta-cadinene synthase (EC 4.2.3.13) (D-cadinene synthase) - Gossypium hirsutum (Upland cotton)Terpene_cyclase_plant_C1 Terpene_cyclase_C1 Terpene_synth_C Terpene_synth Isoprenoid_Biosyn_C1 protein|terpene synthase, putative, expres…	T
LOC_Os08g07490.1	35.2	not assigned.unknown	protein|expressed protein	T
LOC_Os08g08084.1	35.2	not assigned.unknown	protein|expressed protein	T
LOC_Os08g08990.1	20.2.99	stress.abiotic.unspecified	moderately similar to ( 229) AT3G05950 | Symbols: | germin-like protein, putative | chr3:1781130-1781964 REVERSEweakly similar to ( 198) GLP1_MESCR Germin-like protein precursor - Mesembryanthemum crystallinum (Common ice plant)Cupin_1 protein|Cupin domain containing protein, expressed	T
LOC_Os08g09000.1	20.2.99	stress.abiotic.unspecified	moderately similar to ( 242) AT3G05950 | Symbols: | germin-like protein, putative | chr3:1781130-1781964 REVERSEweakly similar to ( 191) GLP1_MESCR Germin-like protein precursor - Mesembryanthemum crystallinum (Common ice plant)Cupin_1 protein|Cupin domain containing protein, expressed	T
LOC_Os08g09020.1	20.2.99	stress.abiotic.unspecified	moderately similar to ( 243) AT3G05950 | Symbols: | germin-like protein, putative | chr3:1781130-1781964 REVERSEweakly similar to ( 197) GLP1_MESCR Germin-like protein precursor - Mesembryanthemum crystallinum (Common ice plant)Cupin_1 protein|Cupin domain containing protein, expressed	T
LOC_Os08g09040.1	20.2.99	stress.abiotic.unspecified	moderately similar to ( 244) AT3G05950 | Symbols: | germin-like protein, putative | chr3:1781130-1781964 REVERSEweakly similar to ( 197) GLP1_MESCR Germin-like protein precursor - Mesembryanthemum crystallinum (Common ice plant)Cupin_1 protein|Cupin domain containing protein, expressed	T
LOC_Os08g09770.1	20.2.1	stress.abiotic.heat	highly similar to ( 875) AT5G28540 | Symbols: BIP1 | BIP1; ATP binding | chr5:10540665-10543274 REVERSEhighly similar to ( 881) BIP4_TOBAC Luminal-binding protein 4 precursor (BiP 4) (78 kDa glucose-regulated protein homolog 4) (GRP 78-4) - Nicotiana tabacum (Common tobacco) HSP70 dnaK DnaK dnaK hscA hscA PRK11678 protein|DnaK family protein, putative, expressed	T
LOC_Os08g09950.1	11.1.15	lipid metabolism.FA synthesis and FA elongation.ACP desaturase	moderately similar to ( 380) AT3G02610 | Symbols: | acyl-[acyl-carrier-protein] desaturase/ oxidoreductase/ transition metal ion binding | chr3:555665-557458 FORWARDmoderately similar to ( 372) STAD_GOSHI Acyl-[acyl-carrier-protein] desaturase, chloroplast precursor (EC 1.14.19.2) (Stearoyl-ACP desaturase) - Gossypium hirsutum (Upland cotton)FA_desaturase_2 Acyl_ACP_Desat protein|acyl-desaturase,…	T
LOC_Os08g09950.2	11.1.15	lipid metabolism.FA synthesis and FA elongation.ACP desaturase	moderately similar to ( 380) AT3G02610 | Symbols: | acyl-[acyl-carrier-protein] desaturase/ oxidoreductase/ transition metal ion binding | chr3:555665-557458 FORWARDmoderately similar to ( 371) STAD_GOSHI Acyl-[acyl-carrier-protein] desaturase, chloroplast precursor (EC 1.14.19.2) (Stearoyl-ACP desaturase) - Gossypium hirsutum (Upland cotton)FA_desaturase_2 Acyl_ACP_Desat protein|acyl-desaturase,…	T
LOC_Os08g10130.1	35.2	not assigned.unknown	protein|expressed protein	T
LOC_Os08g10160.1	35.2	not assigned.unknown	protein|retrotransposon protein, putative, Ty3-gypsy subclass, expressed	T
LOC_Os08g10180.1	35.2	not assigned.unknown	Transposase_28 protein|retrotransposon protein, putative, unclassified, expressed	T
LOC_Os08g15000.1	27.3	RNA.regulation of transcription	moderately similar to ( 203) AT1G62910 | Symbols: | pentatricopeptide (PPR) repeat-containing protein | chr1:23299060-23303162 FORWARDhighly similar to ( 516) RF1_ORYSA Rf1 protein, mitochondrial precursor (PPR protein) (Fertility restorer) (Restorer for CMS) - Oryza sativa (Rice) protein|pentatricopeptide repeat domain containing protein, putative, expressed	T
LOC_Os08g19680.1	35.2	not assigned.unknown	protein|expressed protein	T
LOC_Os08g25670.1	35.2	not assigned.unknown	protein|expressed protein	T
LOC_Os08g27740.1	30.11	signalling.light	moderately similar to ( 280) AT4G38180 | Symbols: FRS5 | FRS5 (FAR1-related sequence 5); zinc ion binding | chr4:17906702-17909404 REVERSE protein|transposon protein, putative, unclassified, expressed	T
LOC_Os08g27759.1	35.2	not assigned.unknown	protein|expressed protein	T
LOC_Os08g28470.1	35.2	not assigned.unknown	protein|disease resistance protein RPM1, putative, expressed	T
LOC_Os08g28790.1	20.1	stress.biotic	very weakly similar to (81.3) AT1G22900 | Symbols: | FUNCTIONS IN: molecular_function unknown; INVOLVED IN: defense response; LOCATED IN: endomembrane system; EXPRESSED IN: stamen; EXPRESSED DURING: 4 anthesis; CONTAINS InterPro DOMAIN/s: Plant disease resistance response protein (InterPro:IPR004265); BEST Arabidopsis thaliana protein match is: disease resistance-responsive family protein (TAIR:A…	T
LOC_Os08g30870.1	27.3.69	RNA.regulation of transcription.SET-domain transcriptional regulator family	weakly similar to ( 101) AT2G35160 | Symbols: SUVH5, SGD9 | SUVH5 (SU(VAR)3-9 HOMOLOG 5); histone methyltransferase | chr2:14823562-14825946 FORWARDYDG_SRA SRA protein|YDG/SRA domain containing protein, expressed	T
LOC_Os08g31250.1	35.2	not assigned.unknown	weakly similar to ( 127) AT2G16050 | Symbols: | FUNCTIONS IN: molecular_function unknown; INVOLVED IN: biological_process unknown; LOCATED IN: cellular_component unknown; CONTAINS InterPro DOMAIN/s: DC1 (InterPro:IPR004146); BEST Arabidopsis thaliana protein match is: DC1 domain-containing protein (TAIR:AT1G20990.1); Has 719 Blast hits to 448 proteins in 12 species: Archae - 0; Bacteria - 0; Meta…	T
LOC_Os08g34050.1	4.2.4	glycolysis.plastid branch.phosphofructokinase (PFK)	highly similar to ( 728) AT2G22480 | Symbols: PFK5 | PFK5 (PHOSPHOFRUCTOKINASE 5); 6-phosphofructokinase | chr2:9545670-9548414 FORWARD PRK06830 PfkA PRK03202 PFK Bacterial_PFK PFK PRK07085 Eukaryotic_PFK protein|phosphofructokinase, putative, expressed	T
LOC_Os08g34390.1	35.2	not assigned.unknown	protein|retrotransposon protein, putative, unclassified, expressed	T
LOC_Os08g34510.1	35.2	not assigned.unknown	protein|expressed protein	T
LOC_Os08g34890.1	29.5.11.4.3.2	protein.degradation.ubiquitin.E3.SCF.FBOX	weakly similar to ( 142) AT1G57790 | Symbols: | F-box family protein | chr1:21404578-21405636 REVERSE protein|OsFBDUF46 - F-box and DUF domain containing protein, expressed	T
LOC_Os08g35300.1	35.2	not assigned.unknown	protein|expressed protein	T
LOC_Os08g35310.1	26.6	misc.O-methyl transferases	weakly similar to ( 194) AT4G35160 | Symbols: | O-methyltransferase family 2 protein | chr4:16730989-16732808 REVERSEmoderately similar to ( 279) ZRP4_MAIZE O-methyltransferase ZRP4 (EC 2.1.1.-) (OMT) - Zea mays (Maize) Methyltransf_2 protein|O-methyltransferase, putative, expressed	T
LOC_Os08g35330.1	35.2	not assigned.unknown	protein|expressed protein	T
LOC_Os08g35500.1	35.2	not assigned.unknown	protein|expressed protein	T
LOC_Os08g36740.1	27.3.6	RNA.regulation of transcription.bHLH,Basic Helix-Loop-Helix family	weakly similar to ( 127) AT5G67060 | Symbols: HEC1 | HEC1 (HECATE 1); transcription factor | chr5:26766276-26767001 FORWARD protein|bHelix-loop-helix transcription factor, putative, expressed	T
LOC_Os08g37130.1	26.22	misc.short chain dehydrogenase/reductase (SDR)	moderately similar to ( 286) AT3G50560 | Symbols: | short-chain dehydrogenase/reductase (SDR) family protein | chr3:18761247-18763835 REVERSE fabG DltE COG4221 fabG fabG PRK12829 fabG PRK07063 PRK07326 FabG PRK08643 PRK07825 protein|oxidoreductase, short chain dehydrogenase/reductase family domain containing protein, expressed	T
LOC_Os08g37150.1	35.2	not assigned.unknown	moderately similar to ( 217) AT5G42680 | Symbols: | unknown protein | chr5:17114640-17115356 FORWARDDUF617 protein|DUF617 domain containing protein, expressed	T
LOC_Os08g39240.1	29.4.1.57	protein.postranslational modification.kinase.receptor like cytoplasmatic kinase VII	moderately similar to ( 384) AT1G21240 | Symbols: WAK3 | WAK3 (wall associated kinase 3); kinase/ protein serine/threonine kinase | chr1:7434303-7436702 FORWARDweakly similar to ( 192) CRI4_MAIZE Putative receptor protein kinase CRINKLY4 precursor (EC 2.7.11.1) - Zea mays (Maize) TyrKc Pkinase_Tyr S_TKc PTKc S_TKc Pkinase PTKc_Csk_like PTKc_Src_like PTKc_Btk_Bmx PTKc_Tec_like PTKc_Abl PTKc_Syk_li…	T
LOC_Os08g39240.2	29.4.1.57	protein.postranslational modification.kinase.receptor like cytoplasmatic kinase VII	moderately similar to ( 330) AT1G21240 | Symbols: WAK3 | WAK3 (wall associated kinase 3); kinase/ protein serine/threonine kinase | chr1:7434303-7436702 FORWARDweakly similar to ( 195) CRI4_MAIZE Putative receptor protein kinase CRINKLY4 precursor (EC 2.7.11.1) - Zea mays (Maize) TyrKc Pkinase_Tyr PTKc S_TKc Pkinase S_TKc PTKc_Csk_like PTKc_Src_like PTKc_Btk_Bmx PTKc_Tec_like PTKc_Abl PTKc_Syk_li…	T
LOC_Os08g43200.1	27.3.3	RNA.regulation of transcription.AP2/EREBP, APETALA2/Ethylene-responsive element binding protein family	very weakly similar to (84.0) AT4G25470 | Symbols: CBF2, DREB1C, FTQ4, ATCBF2 | CBF2 (C-REPEAT/DRE BINDING FACTOR 2); DNA binding / transcription activator/ transcription factor | chr4:13015436-13016086 REVERSEAP2 protein|dehydration-responsive element-binding protein, putative, expressed	T
LOC_Os08g43700.1	17.2.3	hormone metabolism.auxin.induced-regulated-responsive-activated	very weakly similar to (97.4) AT1G29500 | Symbols: | auxin-responsive protein, putative | chr1:10321290-10321697 FORWARD protein|OsSAUR36 - Auxin-responsive SAUR gene family member, expressed	T
LOC_Os08g44180.1	35.2	not assigned.unknown	weakly similar to ( 186) AT5G57880 | Symbols: | unknown protein | chr5:23443977-23446439 FORWARD protein|expressed protein	T
LOC_Os09g02000.1	35.2	not assigned.unknown	protein|expressed protein	T
LOC_Os09g03700.1	35.2	not assigned.unknown	DUF390 Transposase_28 protein|retrotransposon protein, putative, unclassified, expressed	T
LOC_Os09g04624.1	26.28	misc.GDSL-motif lipase	moderately similar to ( 344) AT2G42990 | Symbols: | GDSL-motif lipase/hydrolase family protein | chr2:17879056-17880200 FORWARDmoderately similar to ( 216) APG_BRANA Anter-specific proline-rich protein APG (Protein CEX) (Fragment) - Brassica napus (Rape)SGNH_plant_lipase_like fatty_acyltransferase_like Triacylglycerol_lipase_like COG3240 protein|GDSL-like lipase/acylhydrolase, putative, expressed	T
LOC_Os09g04624.2	26.28	misc.GDSL-motif lipase	moderately similar to ( 285) AT2G42990 | Symbols: | GDSL-motif lipase/hydrolase family protein | chr2:17879056-17880200 FORWARDweakly similar to ( 174) APG_BRANA Anter-specific proline-rich protein APG (Protein CEX) (Fragment) - Brassica napus (Rape)SGNH_plant_lipase_like fatty_acyltransferase_like protein|GDSL-like lipase/acylhydrolase, putative, expressed	T
LOC_Os09g06220.1	35.2	not assigned.unknown	protein|retrotransposon protein, putative, unclassified, expressed	T
LOC_Os09g06530.1	35.2	not assigned.unknown	protein|expressed protein	T
LOC_Os09g07290.1	26.28	misc.GDSL-motif lipase	moderately similar to ( 291) AT2G42990 | Symbols: | GDSL-motif lipase/hydrolase family protein | chr2:17879056-17880200 FORWARDweakly similar to ( 179) APG_BRANA Anter-specific proline-rich protein APG (Protein CEX) (Fragment) - Brassica napus (Rape)SGNH_plant_lipase_like fatty_acyltransferase_like Triacylglycerol_lipase_like protein|GDSL-like lipase/acylhydrolase, putative, expressed	T
LOC_Os09g07440.1	16.8.4	secondary metabolism.flavonoids.flavonols	moderately similar to ( 249) AT5G41980 | Symbols: | unknown protein | chr5:16793765-16794889 FORWARD protein|retrotransposon protein, putative, unclassified, expressed	T
LOC_Os09g07780.1	27.3.25	RNA.regulation of transcription.MYB domain transcription factor family	highly similar to ( 597) AT3G57430 | Symbols: | pentatricopeptide (PPR) repeat-containing protein | chr3:21255731-21258403 REVERSEweakly similar to ( 111) RF1_ORYSA Rf1 protein, mitochondrial precursor (PPR protein) (Fertility restorer) (Restorer for CMS) - Oryza sativa (Rice) protein|pentatricopeptide repeat protein PPR986-12, putative, expressed	T
LOC_Os09g08720.1	26.11.1	misc.alcohol dehydrogenases	moderately similar to ( 353) AT1G15950 | Symbols: CCR1, IRX4, ATCCR1 | CCR1 (CINNAMOYL COA REDUCTASE 1); cinnamoyl-CoA reductase | chr1:5478855-5481949 FORWARDweakly similar to ( 191) DFRA_DIACA Dihydroflavonol-4-reductase (EC 1.1.1.219) (DFR) (Dihydrokaempferol 4-reductase) - Dianthus caryophyllus (Carnation) (Clove pink) WcaG 3Beta_HSD protein|cinnamoyl CoA reductase, putative, expressed	T
LOC_Os09g08950.1	35.2	not assigned.unknown	protein|expressed protein	T
LOC_Os09g08990.1	26.1	misc.cytochrome P450	moderately similar to ( 402) AT5G07990 | Symbols: TT7, CYP75B1, D501 | TT7 (TRANSPARENT TESTA 7); flavonoid 3-monooxygenase/ oxygen binding | chr5:2560437-2562859 FORWARDmoderately similar to ( 395) C93A1_SOYBN Cytochrome P450 93A1 (EC 1.14.-.-) - Glycine max (Soybean) p450 CypX protein|cytochrome P450, putative, expressed	T
LOC_Os09g09450.1	35.2	not assigned.unknown	protein|PPR repeat domain containing protein, putative, expressed	T
LOC_Os09g10380.1	30.11	signalling.light	weakly similar to ( 121) AT4G38180 | Symbols: FRS5 | FRS5 (FAR1-related sequence 5); zinc ion binding | chr4:17906702-17909404 REVERSE protein|transposon protein, putative, unclassified, expressed	T
LOC_Os09g12390.1	35.2	not assigned.unknown	protein|expressed protein	T
LOC_Os09g12670.1	30.11	signalling.light	very weakly similar to (91.7) AT4G38180 | Symbols: FRS5 | FRS5 (FAR1-related sequence 5); zinc ion binding | chr4:17906702-17909404 REVERSE protein|transposon protein, putative, unclassified	T
LOC_Os09g16030.1	26.2	misc.UDP glucosyl and glucoronyl transferases	moderately similar to ( 311) AT2G16890 | Symbols: | UDP-glucoronosyl/UDP-glucosyl transferase family protein | chr2:7316938-7319022 FORWARDweakly similar to ( 167) ZOX_PHAVU Zeatin O-xylosyltransferase (EC 2.4.2.40) (Zeatin O-beta-D-xylosyltransferase) - Phaseolus vulgaris (Kidney bean) (French bean) UDPGT protein|cytokinin-O-glucosyltransferase 1, putative, expressed	T
LOC_Os09g16050.1	31.1	cell.organisation	weakly similar to ( 113) AT4G03460 | Symbols: | ankyrin repeat family protein | chr4:1536404-1540111 REVERSE protein|ankyrin repeat family protein, putative, expressed	T
LOC_Os09g16060.1	35.2	not assigned.unknown	protein|expressed protein	T
LOC_Os09g16070.1	35.2	not assigned.unknown	protein|expressed protein	T
LOC_Os09g16290.1	34.16	transport.ABC transporters and multidrug resistance systems	nearly identical (1570) AT1G15520 | Symbols: PDR12, ATPDR12 | PDR12 (PLEIOTROPIC DRUG RESISTANCE 12); ATPase, coupled to transmembrane movement of substances | chr1:5331993-5338175 REVERSEnearly identical (1698) PDR4_ORYSA Pleiotropic drug resistance protein 4 - Oryza sativa (Rice) ABC_PDR_domain2 ABCG_EPDR ABCG_White ABC_PDR_domain1 CcmA ABC2_membrane ABC_subfamily_A SalX ABC_drug_resistance_lik…	T
LOC_Os09g16449.1	34.16	transport.ABC transporters and multidrug resistance systems	highly similar to ( 612) AT1G15520 | Symbols: PDR12, ATPDR12 | PDR12 (PLEIOTROPIC DRUG RESISTANCE 12); ATPase, coupled to transmembrane movement of substances | chr1:5331993-5338175 REVERSEhighly similar to ( 654) PDR4_ORYSA Pleiotropic drug resistance protein 4 - Oryza sativa (Rice) ABC_PDR_domain2 ABCG_EPDR ABCG_White CcmA ABC_PDR_domain1 ABC_tran ABC_cobalt_CbiO_domain1 ABC_subfamily_A ABC_MJ0…	T
LOC_Os09g16449.2	34.16	transport.ABC transporters and multidrug resistance systems	moderately similar to ( 458) AT1G15520 | Symbols: PDR12, ATPDR12 | PDR12 (PLEIOTROPIC DRUG RESISTANCE 12); ATPase, coupled to transmembrane movement of substances | chr1:5331993-5338175 REVERSEmoderately similar to ( 491) PDR4_ORYSA Pleiotropic drug resistance protein 4 - Oryza sativa (Rice) ABC_PDR_domain2 ABCG_EPDR ABCG_White CcmA ABC_PDR_domain1 ABC_subfamily_A ABC_tran ABC_cobalt_CbiO_domain1…	T
LOC_Os09g16449.3	34.16	transport.ABC transporters and multidrug resistance systems	moderately similar to ( 458) AT1G15520 | Symbols: PDR12, ATPDR12 | PDR12 (PLEIOTROPIC DRUG RESISTANCE 12); ATPase, coupled to transmembrane movement of substances | chr1:5331993-5338175 REVERSEmoderately similar to ( 491) PDR4_ORYSA Pleiotropic drug resistance protein 4 - Oryza sativa (Rice) ABC_PDR_domain2 ABCG_EPDR ABCG_White CcmA ABC_PDR_domain1 ABC_subfamily_A ABC_tran ABC_cobalt_CbiO_domain1…	T
LOC_Os09g16458.1	34.16	transport.ABC transporters and multidrug resistance systems	moderately similar to ( 481) AT1G15520 | Symbols: PDR12, ATPDR12 | PDR12 (PLEIOTROPIC DRUG RESISTANCE 12); ATPase, coupled to transmembrane movement of substances | chr1:5331993-5338175 REVERSEhighly similar to ( 535) PDR4_ORYSA Pleiotropic drug resistance protein 4 - Oryza sativa (Rice) ABC_PDR_domain1 ABCG_White CcmA ABCG_EPDR ABC_subfamily_A ABC_cobalt_CbiO_domain1 ABC_tran FepC SunT ZnuC ABC_…	T
LOC_Os09g16790.1	35.2	not assigned.unknown	Transposase_21 protein|transposon protein, putative, CACTA, En/Spm sub-class, expressed	T
LOC_Os09g17940.1	35.2	not assigned.unknown	protein|expressed protein	T
LOC_Os09g18090.1	35.2	not assigned.unknown	DUF1165 protein|retrotransposon protein, putative, Ty3-gypsy subclass, expressed	T
LOC_Os09g21040.1	35.2	not assigned.unknown	protein|expressed protein	T
LOC_Os09g22480.1	35.2	not assigned.unknown	protein|hypothetical protein	T
LOC_Os09g23620.1	27.3.25	RNA.regulation of transcription.MYB domain transcription factor family	moderately similar to ( 262) AT1G66230 | Symbols: MYB20, AtMYB20 | MYB20 (myb domain protein 20); DNA binding / transcription factor | chr1:24677322-24678246 FORWARDmoderately similar to ( 251) ODO1_PETHY ODORANT1 protein (MYB-like protein ODO1) - Petunia hybrida (Petunia) protein|MYB family transcription factor, putative, expressed	T
LOC_Os09g24810.1	27.3.80	RNA.regulation of transcription.zf-HD	protein|ZF-HD protein dimerisation region containing protein, expressed	T
LOC_Os09g25690.1	35.2	not assigned.unknown	protein|retrotransposon protein, putative, unclassified, expressed	T
LOC_Os09g25700.1	35.2	not assigned.unknown	protein|TsetseEP precursor, putative, expressed	T
LOC_Os09g26290.1	34.3	transport.amino acids	weakly similar to ( 133) AT3G30390 | Symbols: | amino acid transporter family protein | chr3:11977112-11978827 REVERSE protein|amino acid transporter family protein, putative, expressed	T
LOC_Os09g26999.1	35.2	not assigned.unknown	protein|keratin-associated protein 5-4, putative, expressed	T
LOC_Os09g26999.2	35.2	not assigned.unknown	protein|keratin-associated protein 5-4, putative, expressed	T
LOC_Os09g26999.3	35.2	not assigned.unknown	protein|keratin-associated protein 5-4, putative, expressed	T
LOC_Os09g27550.1	35.2	not assigned.unknown	protein|expressed protein	T
LOC_Os09g28440.1	17.5.2	hormone metabolism.ethylene.signal transduction	very weakly similar to (82.8) AT4G34410 | Symbols: RRTF1 | RRTF1 ({REDOX RESPONSIVE TRANSCRIPTION FACTOR 1); DNA binding / transcription factor | chr4:16451992-16452798 FORWARDAP2 AP2 protein|AP2 domain containing protein, expressed	T
LOC_Os09g30490.1	30.3	signalling.calcium	weakly similar to ( 112) AT2G44310 | Symbols: | calcium-binding EF hand family protein | chr2:18309285-18309713 FORWARD protein|EF hand family protein, expressed	T
LOC_Os09g31446.1	35.2	not assigned.unknown	protein|expressed protein	T
LOC_Os09g32120.1	35.2	not assigned.unknown	protein|expressed protein	T
LOC_Os09g33580.1	27.3.6	RNA.regulation of transcription.bHLH,Basic Helix-Loop-Helix family	weakly similar to ( 126) AT5G50915 | Symbols: | basic helix-loop-helix (bHLH) family protein | chr5:20710764-20712252 REVERSE protein|BEE 1, putative, expressed	T
LOC_Os09g33580.2	27.3.6	RNA.regulation of transcription.bHLH,Basic Helix-Loop-Helix family	weakly similar to ( 126) AT5G50915 | Symbols: | basic helix-loop-helix (bHLH) family protein | chr5:20710764-20712252 REVERSE protein|BEE 1, putative, expressed	T
LOC_Os09g33640.1	35.2	not assigned.unknown	protein|expressed protein	T
LOC_Os09g34160.1	20.1.7	stress.biotic.PR-proteins	moderately similar to ( 246) AT3G07040 | Symbols: RPM1, RPS3 | RPM1 (RESISTANCE TO P. SYRINGAE PV MACULICOLA 1); nucleotide binding / protein binding | chr3:2226244-2229024 REVERSE NB-ARC protein|resistance protein, putative, expressed	T
LOC_Os09g34330.1	27.3.6	RNA.regulation of transcription.bHLH,Basic Helix-Loop-Helix family	protein|helix-loop-helix DNA-binding domain containing protein, expressed	T
LOC_Os09g35600.1	34.99	transport.misc	moderately similar to ( 378) AT4G29140 | Symbols: | MATE efflux protein-related | chr4:14369148-14370746 FORWARD NorM PRK01766 MatE protein|MATE domain containing protein, expressed	T
LOC_Os09g37394.1	17.2.3	hormone metabolism.auxin.induced-regulated-responsive-activated	very weakly similar to (95.9) AT1G29500 | Symbols: | auxin-responsive protein, putative | chr1:10321290-10321697 FORWARD protein|OsSAUR44 - Auxin-responsive SAUR gene family member, expressed	T
LOC_Os09g37400.1	17.2.3	hormone metabolism.auxin.induced-regulated-responsive-activated	weakly similar to ( 102) AT1G29420 | Symbols: | FUNCTIONS IN: molecular_function unknown; INVOLVED IN: response to auxin stimulus; LOCATED IN: cellular_component unknown; CONTAINS InterPro DOMAIN/s: Auxin responsive SAUR protein (InterPro:IPR003676); BEST Arabidopsis thaliana protein match is: SAUR68 (SMALL AUXIN UPREGULATED 68) (TAIR:AT1G29510.1); Has 372 Blast hits to 362 proteins in 16 species…	T
LOC_Os09g37460.1	17.2.3	hormone metabolism.auxin.induced-regulated-responsive-activated	very weakly similar to (83.2) AT1G29500 | Symbols: | auxin-responsive protein, putative | chr1:10321290-10321697 FORWARD protein|OsSAUR51 - Auxin-responsive SAUR gene family member, expressed	T
LOC_Os09g37470.1	17.2.3	hormone metabolism.auxin.induced-regulated-responsive-activated	very weakly similar to (92.8) AT1G29500 | Symbols: | auxin-responsive protein, putative | chr1:10321290-10321697 FORWARD protein|OsSAUR52 - Auxin-responsive SAUR gene family member, expressed	T
LOC_Os09g37500.1	17.2.3	hormone metabolism.auxin.induced-regulated-responsive-activated	very weakly similar to (92.8) AT1G29420 | Symbols: | FUNCTIONS IN: molecular_function unknown; INVOLVED IN: response to auxin stimulus; LOCATED IN: cellular_component unknown; CONTAINS InterPro DOMAIN/s: Auxin responsive SAUR protein (InterPro:IPR003676); BEST Arabidopsis thaliana protein match is: SAUR68 (SMALL AUXIN UPREGULATED 68) (TAIR:AT1G29510.1); Has 372 Blast hits to 362 proteins in 16 sp…	T
LOC_Os09g38150.1	35.2	not assigned.unknown	protein|expressed protein	T
LOC_Os09g38610.1	35.2	not assigned.unknown	protein|ZOS9-18 - C2H2 zinc finger protein, expressed	T
LOC_Os09g38840.1	30.2.99	signalling.receptor kinases.misc	moderately similar to ( 436) AT1G21230 | Symbols: WAK5 | WAK5 (WALL ASSOCIATED KINASE 5); kinase/ protein serine/threonine kinase | chr1:7429980-7432346 FORWARDweakly similar to ( 182) NORK_MEDTR Nodulation receptor kinase precursor (EC 2.7.11.1) (Does not make infections protein 2) (Symbiosis receptor-like kinase) (MtSYMRK) - Medicago truncatula (Barrel medic) TyrKc Pkinase_Tyr S_TKc PTKc Pkinas…	T
LOC_Os09g39630.1	35.2	not assigned.unknown	protein|conserved hypothetical protein	T
LOC_Os10g01660.1	20.1	stress.biotic	moderately similar to ( 220) AT5G17540 | Symbols: | transferase family protein | chr5:5782061-5783682 REVERSEweakly similar to ( 106) HCBT1_DIACA Anthranilate N-benzoyltransferase protein 1 (EC 2.3.1.144) (Anthranilate N-hydroxycinnamoyl/benzoyltransferase 1) - Dianthus caryophyllus (Carnation) (Clove pink)Transferase protein|transferase family protein, putative, expressed	T
LOC_Os10g01690.1	16.2	secondary metabolism.phenylpropanoids	moderately similar to ( 247) AT5G17540 | Symbols: | transferase family protein | chr5:5782061-5783682 REVERSEweakly similar to ( 132) HCBT1_DIACA Anthranilate N-benzoyltransferase protein 1 (EC 2.3.1.144) (Anthranilate N-hydroxycinnamoyl/benzoyltransferase 1) - Dianthus caryophyllus (Carnation) (Clove pink)Transferase protein|transferase family protein, putative, expressed	T
LOC_Os10g02250.1	30.2.99	signalling.receptor kinases.misc	moderately similar to ( 390) AT1G21270 | Symbols: WAK2 | WAK2; ATP binding / calcium ion binding / protein kinase/ protein serine/threonine kinase | chr1:7444997-7447345 FORWARDweakly similar to ( 178) NORK_MEDTR Nodulation receptor kinase precursor (EC 2.7.11.1) (Does not make infections protein 2) (Symbiosis receptor-like kinase) (MtSYMRK) - Medicago truncatula (Barrel medic) Pkinase_Tyr PTKc T…	T
LOC_Os10g02840.1	16.2	secondary metabolism.phenylpropanoids	weakly similar to ( 109) AT1G51990 | Symbols: | O-methyltransferase family 2 protein | chr1:19330949-19332667 FORWARDmoderately similar to ( 218) ZRP4_MAIZE O-methyltransferase ZRP4 (EC 2.1.1.-) (OMT) - Zea mays (Maize) Methyltransf_2 protein|O-methyltransferase, putative, expressed	T
LOC_Os10g02880.1	26.6	misc.O-methyl transferases	weakly similar to ( 142) AT4G35160 | Symbols: | O-methyltransferase family 2 protein | chr4:16730989-16732808 REVERSEmoderately similar to ( 319) ZRP4_MAIZE O-methyltransferase ZRP4 (EC 2.1.1.-) (OMT) - Zea mays (Maize) Methyltransf_2 protein|O-methyltransferase, putative, expressed	T
LOC_Os10g02960.1	30.2.17	signalling.receptor kinases.DUF 26	moderately similar to ( 332) AT4G23160 | Symbols: | protein kinase family protein | chr4:12129485-12134086 FORWARDhighly similar to ( 661) POLX_TOBAC Retrovirus-related Pol polyprotein from transposon TNT 1-94 [Includes: Protease (EC 3.4.23.-); Reverse transcriptase (EC 2.7.7.49); Endonuclease] - Nicotiana tabacum (Common tobacco)RVT_2 rve protein|retrotransposon protein, putative, Ty1-copia subc…	T
LOC_Os10g02970.1	30.2.12	signalling.receptor kinases.leucine rich repeat XII	very weakly similar to (95.9) AT1G35710 | Symbols: | leucine-rich repeat transmembrane protein kinase, putative | chr1:13220940-13224386 FORWARD protein|Leucine rich repeat N-terminal domain containing protein, putative, expressed	T
LOC_Os10g03230.1	35.2	not assigned.unknown	protein|expressed protein	T
LOC_Os10g03930.1	35.2	not assigned.unknown	protein|OsFBX355 - F-box domain containing protein, expressed	T
LOC_Os10g03960.1	35.2	not assigned.unknown	protein|expressed protein	T
LOC_Os10g04380.1	35.2	not assigned.unknown	protein|expressed protein	T
LOC_Os10g04400.1	20.1	stress.biotic	weakly similar to ( 161) AT5G17540 | Symbols: | transferase family protein | chr5:5782061-5783682 REVERSETransferase protein|transferase family protein, putative, expressed	T
LOC_Os10g04429.1	20.1	stress.biotic	moderately similar to ( 275) AT5G17540 | Symbols: | transferase family protein | chr5:5782061-5783682 REVERSEvery weakly similar to (89.4) HCBT1_DIACA Anthranilate N-benzoyltransferase protein 1 (EC 2.3.1.144) (Anthranilate N-hydroxycinnamoyl/benzoyltransferase 1) - Dianthus caryophyllus (Carnation) (Clove pink)Transferase protein|transferase family protein, putative, expressed	T
LOC_Os10g04560.1	35.2	not assigned.unknown	protein|hypothetical protein	T
LOC_Os10g04625.1	35.2	not assigned.unknown	protein|expressed protein	T
LOC_Os10g04800.1	35.2	not assigned.unknown	protein|expressed protein	T
LOC_Os10g07010.1	11.1.10	lipid metabolism.FA synthesis and FA elongation.beta ketoacyl CoA synthase	highly similar to ( 565) AT1G01120 | Symbols: KCS1 | KCS1 (3-KETOACYL-COA SYNTHASE 1); acyltransferase/ fatty acid elongase | chr1:57392-58978 REVERSEFAE1_CUT1_RppA CHS_like BcsA protein|3-ketoacyl-CoA synthase, putative, expressed	T
LOC_Os10g08610.1	35.2	not assigned.unknown	DUF1668 protein|expressed protein	T
LOC_Os10g09240.1	35.2	not assigned.unknown	protein|expressed protein	T
LOC_Os10g12090.1	35.2	not assigned.unknown	protein|expressed protein	T
LOC_Os10g12400.1	33.99	development.unspecified	weakly similar to ( 134) AT4G01440 | Symbols: | nodulin MtN21 family protein | chr4:596531-598512 FORWARD protein|nodulin, putative, expressed	T
LOC_Os10g17690.1	20.1.7	stress.biotic.PR-proteins	weakly similar to ( 119) AT3G14470 | Symbols: | disease resistance protein (NBS-LRR class), putative | chr3:4857940-4861104 FORWARD NB-ARC protein|NB-ARC domain containing protein, expressed	T
LOC_Os10g18260.1	30.2.24	signalling.receptor kinases.S-locus glycoprotein like	moderately similar to ( 370) AT4G23180 | Symbols: CRK10, RLK4 | CRK10 (CYSTEINE-RICH RLK10); ATP binding / kinase/ protein kinase/ protein serine/threonine kinase/ protein tyrosine kinase | chr4:12138171-12140780 FORWARDweakly similar to ( 197) PSKR_DAUCA Phytosulfokine receptor precursor (EC 2.7.11.1) (Phytosulfokine LRR receptor kinase) - Daucus carota (Carrot) Pkinase_Tyr TyrKc PTKc S_TKc Pkin…	T
LOC_Os10g18700.1	35.2	not assigned.unknown	protein|expressed protein	T
LOC_Os10g20080.1	35.2	not assigned.unknown	protein|expressed protein	T
LOC_Os10g20610.1	16.1	secondary metabolism.simple phenols	moderately similar to ( 426) AT3G09220 | Symbols: LAC7 | LAC7 (laccase 7); laccase | chr3:2827434-2830477 REVERSEweakly similar to ( 120) ASO_TOBAC L-ascorbate oxidase precursor (EC 1.10.3.3) (Ascorbase) (ASO) - Nicotiana tabacum (Common tobacco) Cu-oxidase_3 Cu-oxidase_2 SufI Cu-oxidase protein|laccase-15 precursor, putative, expressed	T
LOC_Os10g23240.1	35.2	not assigned.unknown	protein|expressed protein	T
LOC_Os10g23310.1	16.2	secondary metabolism.phenylpropanoids	weakly similar to ( 135) AT5G48930 | Symbols: HCT | HCT (HYDROXYCINNAMOYL-COA SHIKIMATE/QUINATE HYDROXYCINNAMOYL TRANSFERASE); quinate O-hydroxycinnamoyltransferase/ shikimate O-hydroxycinnamoyltransferase/ transferase | chr5:19836654-19838092 REVERSEweakly similar to ( 123) HCBT1_DIACA Anthranilate N-benzoyltransferase protein 1 (EC 2.3.1.144) (Anthranilate N-hydroxycinnamoyl/benzoyltransferase …	T
LOC_Os10g25340.1	26.28	misc.GDSL-motif lipase	moderately similar to ( 256) AT2G27360 | Symbols: | lipase, putative | chr2:11706233-11707905 FORWARDweakly similar to ( 157) EST_HEVBR Esterase precursor (EC 3.1.1.-) (Early nodule-specific protein homolog) (Latex allergen Hev b 13) - Hevea brasiliensis (Para rubber tree)SGNH_plant_lipase_like fatty_acyltransferase_like COG3240 protein|GDSL-like lipase/acylhydrolase, putative, expressed	T
LOC_Os10g25400.1	26.28	misc.GDSL-motif lipase	moderately similar to ( 232) AT1G28600 | Symbols: | lipase, putative | chr1:10051604-10053073 REVERSEweakly similar to ( 140) EST_HEVBR Esterase precursor (EC 3.1.1.-) (Early nodule-specific protein homolog) (Latex allergen Hev b 13) - Hevea brasiliensis (Para rubber tree)SGNH_plant_lipase_like fatty_acyltransferase_like protein|GDSL-like lipase/acylhydrolase, putative, expressed	T
LOC_Os10g34260.1	35.2	not assigned.unknown	protein|expressed protein	T
LOC_Os10g34730.1	17.1.3	hormone metabolism.abscisic acid.induced-regulated-responsive-activated	weakly similar to ( 180) AT5G23370 | Symbols: | GRAM domain-containing protein / ABA-responsive protein-related | chr5:7863542-7864201 REVERSE protein|GEM, putative, expressed	T
LOC_Os10g34960.1	29.5.11.1	protein.degradation.ubiquitin.ubiquitin	weakly similar to ( 157) AT4G05050 | Symbols: UBQ11 | UBQ11 (UBIQUITIN 11); protein binding | chr4:2588271-2588960 REVERSEvery weakly similar to (80.1) UBIQ_ACECL Ubiquitin - Acetabularia cliftonii (Green alga)Ubiquitin protein|ubiquitin family protein, putative, expressed	T
LOC_Os10g35660.1	27.3.25	RNA.regulation of transcription.MYB domain transcription factor family	weakly similar to ( 147) AT4G37780 | Symbols: MYB87, ATMYB87 | MYB87 (MYB DOMAIN PROTEIN 87); DNA binding / transcription factor | chr4:17758404-17759526 REVERSEweakly similar to ( 119) MYB1_HORVU Myb-related protein Hv1 - Hordeum vulgare (Barley) protein|MYB family transcription factor, putative, expressed	T
LOC_Os10g35830.1	35.2	not assigned.unknown	protein|expressed protein	T
LOC_Os10g36110.1	35.2	not assigned.unknown	protein|LTPL158 - Protease inhibitor/seed storage/LTP family protein precursor, expressed	T
LOC_Os10g36360.1	35.2	not assigned.unknown	protein|expressed protein	T
LOC_Os10g36626.1	35.2	not assigned.unknown	protein|expressed protein	T
LOC_Os10g37020.1	26.1	misc.cytochrome P450	moderately similar to ( 330) AT1G64940 | Symbols: CYP89A6 | CYP89A6; electron carrier/ heme binding / iron ion binding / monooxygenase/ oxygen binding | chr1:24123789-24125324 FORWARDmoderately similar to ( 234) C77A3_SOYBN Cytochrome P450 77A3 (EC 1.14.-.-) - Glycine max (Soybean) p450 protein|transposon protein, putative, unclassified, expressed	T
LOC_Os10g37160.1	26.1	misc.cytochrome P450	moderately similar to ( 479) AT1G64940 | Symbols: CYP89A6 | CYP89A6; electron carrier/ heme binding / iron ion binding / monooxygenase/ oxygen binding | chr1:24123789-24125324 FORWARDmoderately similar to ( 336) C77A3_SOYBN Cytochrome P450 77A3 (EC 1.14.-.-) - Glycine max (Soybean) p450 CypX protein|transposon protein, putative, unclassified, expressed	T
LOC_Os10g38160.1	26.9	misc.glutathione S transferases	moderately similar to ( 214) AT1G10360 | Symbols: ATGSTU18, GST29 | ATGSTU18 (GLUTATHIONE S-TRANSFERASE TAU 18); glutathione transferase | chr1:3395738-3396806 REVERSEmoderately similar to ( 245) GSTU6_ORYSA Probable glutathione S-transferase GSTU6 (EC 2.5.1.18) (28 kDa cold-induced protein) - Oryza sativa (Rice) GST_C_Tau GST_N_Tau Gst protein|glutathione S-transferase, putative, expressed	T
LOC_Os10g38820.1	27.3.35	RNA.regulation of transcription.bZIP transcription factor family	weakly similar to ( 183) AT4G38900 | Symbols: | bZIP protein | chr4:18139564-18141520 REVERSEweakly similar to ( 120) RF2A_ORYSA Transcription factor RF2a - Oryza sativa (Rice) protein|bZIP family transcription factor, putative, expressed	T
LOC_Os10g38940.1	16.1.4.6	secondary metabolism.isoprenoids.carotenoids.carotenoid beta ring hydroxylase	moderately similar to ( 283) AT4G25700 | Symbols: BETA-OHASE 1, B1, chy1 | BETA-OHASE 1 (BETA-HYDROXYLASE 1); carotene beta-ring hydroxylase | chr4:13094965-13095866 REVERSE protein|fatty acid hydroxylase, putative, expressed	T
LOC_Os10g39260.1	27.3.99	RNA.regulation of transcription.unclassified	weakly similar to ( 164) AT2G03200 | Symbols: | aspartyl protease family protein | chr2:966506-967891 REVERSE protein|aspartic proteinase nepenthesin, putative, expressed	T
LOC_Os10g39340.1	29.5.4	protein.degradation.aspartate protease	weakly similar to ( 176) AT2G03200 | Symbols: | aspartyl protease family protein | chr2:966506-967891 REVERSE protein|aspartic proteinase nepenthesin precursor, putative, expressed	T
LOC_Os10g39350.1	29.5.4	protein.degradation.aspartate protease	weakly similar to ( 153) AT2G03200 | Symbols: | aspartyl protease family protein | chr2:966506-967891 REVERSE protein|aspartic proteinase nepenthesin, putative, expressed	T
LOC_Os10g39660.1	35.2	not assigned.unknown	DUF241 protein|expressed protein	T
LOC_Os10g39700.1	20.1	stress.biotic	weakly similar to ( 118) AT3G12500 | Symbols: ATHCHIB, PR3, PR-3, CHI-B, B-CHI | ATHCHIB (ARABIDOPSIS THALIANA BASIC CHITINASE); chitinase | chr3:3962501-3963945 REVERSEweakly similar to ( 130) CHIP_TOBAC Acidic endochitinase P precursor (EC 3.2.1.14) (Pathogenesis-related protein P) (PR-P) - Nicotiana tabacum (Common tobacco) Glyco_hydro_19 chitinase_glyco_hydro_19 protein|CHIT15 - Chitinase fam…	T
LOC_Os10g39840.1	10.7	cell wall.modification	moderately similar to ( 338) AT3G44990 | Symbols: XTR8, ATXTR8 | XTR8 (XYLOGLUCAN ENDO-TRANSGLYCOSYLASE-RELATED 8); hydrolase, acting on glycosyl bonds / xyloglucan:xyloglucosyl transferase | chr3:16447280-16448678 REVERSEweakly similar to ( 175) XTH_TOBAC Probable xyloglucan endotransglucosylase/hydrolase protein precursor (EC 2.4.1.207) - Nicotiana tabacum (Common tobacco)GH16_XET Glyco_hydro_1…	T
LOC_Os10g41620.1	27.3.44	RNA.regulation of transcription.Chromatin Remodeling Factors	very weakly similar to (86.3) AT5G63950 | Symbols: CHR24 | CHR24 (chromatin remodeling 24); ATP binding / DNA binding / helicase/ nucleic acid binding | chr5:25592160-25598405 REVERSE SNF2_N protein|retrotransposon protein, putative, unclassified, expressed	T
LOC_Os10g41660.1	35.2	not assigned.unknown	protein|zinc finger, C3HC4 type domain containing protein, expressed	T
LOC_Os10g42130.1	33.99	development.unspecified	moderately similar to ( 256) AT4G17980 | Symbols: anac071 | anac071 (Arabidopsis NAC domain containing protein 71); transcription factor | chr4:9978850-9980038 REVERSEweakly similar to ( 193) NAC74_ORYSA NAC domain-containing protein 74 (ONAC074) - Oryza sativa (Rice)NAM protein|no apical meristem protein, putative, expressed	T
LOC_Os11g01842.1	20	stress	moderately similar to ( 281) AT3G10980 | Symbols: | unknown protein | chr3:3438810-3440501 FORWARD protein|SAG20, putative, expressed	T
LOC_Os11g01860.1	27.3.25	RNA.regulation of transcription.MYB domain transcription factor family	moderately similar to ( 387) AT3G09040 | Symbols: | pentatricopeptide (PPR) repeat-containing protein | chr3:2761195-2764281 REVERSEvery weakly similar to (85.1) RF1_ORYSA Rf1 protein, mitochondrial precursor (PPR protein) (Fertility restorer) (Restorer for CMS) - Oryza sativa (Rice) protein|pentatricopeptide, putative, expressed	T
LOC_Os11g02100.1	26.12	misc.peroxidases	moderately similar to ( 299) AT5G58390 | Symbols: | peroxidase, putative | chr5:23599755-23601244 REVERSEmoderately similar to ( 324) PER1_ARAHY Cationic peroxidase 1 precursor (EC 1.11.1.7) (PNPC1) - Arachis hypogaea (Peanut)secretory_peroxidase plant_peroxidase peroxidase protein|peroxidase precursor, putative, expressed	T
LOC_Os11g02520.1	27.3.32	RNA.regulation of transcription.WRKY domain transcription factor family	protein|WRKY104, expressed	T
LOC_Os11g02750.1	35.2	not assigned.unknown	weakly similar to ( 141) AT2G38640 | Symbols: | unknown protein | chr2:16157725-16158474 REVERSEDUF567 protein|DUF567 domain containing protein, putative, expressed	T
LOC_Os11g03190.1	35.2	not assigned.unknown	protein|expressed protein	T
LOC_Os11g03230.1	23.2	nucleotide metabolism.degradation	moderately similar to ( 263) AT5G18280 | Symbols: ATAPY2, APY2 | ATAPY2 (ARABIDOPSIS THALIANA APYRASE 2); ATPase/ nucleotide diphosphatase | chr5:6050799-6054875 REVERSEmoderately similar to ( 287) NTPA_PEA Nucleoside-triphosphatase (EC 3.6.1.15) (Nucleoside triphosphate phosphohydrolase) (NTPase) (Apyrase) - Pisum sativum (Garden pea) GDA1_CD39 COG5371 protein|nucleoside-triphosphatase, putative…	T
LOC_Os11g03230.2	23.2	nucleotide metabolism.degradation	weakly similar to ( 120) AT5G18280 | Symbols: ATAPY2, APY2 | ATAPY2 (ARABIDOPSIS THALIANA APYRASE 2); ATPase/ nucleotide diphosphatase | chr5:6050799-6054875 REVERSEweakly similar to ( 130) APY_SOLTU Apyrase precursor (EC 3.6.1.5) (ATP-diphosphatase) (Adenosine diphosphatase) (ADPase) (ATP-diphosphohydrolase) - Solanum tuberosum (Potato) GDA1_CD39 protein|nucleoside-triphosphatase, putative, expr…	T
LOC_Os11g03230.3	23.2	nucleotide metabolism.degradation	very weakly similar to (97.4) AT5G18280 | Symbols: ATAPY2, APY2 | ATAPY2 (ARABIDOPSIS THALIANA APYRASE 2); ATPase/ nucleotide diphosphatase | chr5:6050799-6054875 REVERSEweakly similar to ( 110) APY_SOLTU Apyrase precursor (EC 3.6.1.5) (ATP-diphosphatase) (Adenosine diphosphatase) (ADPase) (ATP-diphosphohydrolase) - Solanum tuberosum (Potato) GDA1_CD39 protein|nucleoside-triphosphatase, putative,…	T
LOC_Os11g03610.1	35.2	not assigned.unknown	protein|OsFBX394 - F-box domain containing protein, expressed	T
LOC_Os11g03840.1	30.2.24	signalling.receptor kinases.S-locus glycoprotein like	moderately similar to ( 272) AT1G34300 | Symbols: | lectin protein kinase family protein | chr1:12503450-12505939 FORWARDhighly similar to ( 775) KPRO_MAIZE Putative receptor protein kinase ZmPK1 precursor (EC 2.7.11.1) - Zea mays (Maize) Pkinase S_TKc S_TKc TyrKc Pkinase_Tyr PTKc SPS1 PTKc_Src_like PTKc_Trk PTKc_Jak_rpt2 PTKc_Csk_like PTKc_EphR PTKc_Itk PTKc_Srm_Brk PTKc_EphR_A2 PTKc_EGFR_like P…	T
LOC_Os11g04700.1	35.2	not assigned.unknown	protein|expressed protein	T
LOC_Os11g04710.1	26.1	misc.cytochrome P450	highly similar to ( 523) AT5G05690 | Symbols: CPD, CYP90A, CYP90, CBB3, DWF3, CYP90A1 | CPD (CONSTITUTIVE PHOTOMORPHOGENIC DWARF); electron carrier/ heme binding / iron ion binding / monooxygenase/ oxygen binding | chr5:1702907-1706348 REVERSEmoderately similar to ( 300) C90D2_ORYSA Cytochrome P450 90D2 (EC 1.14.-.-) (C6-oxidase) - Oryza sativa (Rice) p450 CypX protein|cytochrome P450, putative, …	T
LOC_Os11g05770.1	35.2	not assigned.unknown	very weakly similar to (91.7) AT5G04820 | Symbols: ATOFP13, OFP13 | OFP13 (ARABIDOPSIS THALIANA OVATE FAMILY PROTEIN 13) | chr5:1399685-1400467 FORWARDDUF623 protein|DUF623 domain containing protein, expressed	T
LOC_Os11g06150.1	35.2	not assigned.unknown	protein|basic proline-rich protein precursor, putative, expressed	T
LOC_Os11g06730.1	35.2	not assigned.unknown	very weakly similar to (97.1) AT2G21740 | Symbols: | unknown protein | chr2:9281986-9282363 REVERSEDUF1278 protein|ECAGL2 - ECA1 gametogenesis related family protein precursor, expressed	T
LOC_Os11g09150.1	35.2	not assigned.unknown	protein|expressed protein	T
LOC_Os11g09720.1	35.2	not assigned.unknown	weakly similar to ( 189) AT1G43722 | Symbols: | unknown protein | chr1:16496403-16497377 FORWARD protein|transposon protein, putative, CACTA, En/Spm sub-class, expressed	T
LOC_Os11g10470.1	35.2	not assigned.unknown	protein|expressed protein	T
LOC_Os11g19340.1	11.9.2.1	lipid metabolism.lipid degradation.lipases.triacylglycerol lipase	moderately similar to ( 406) AT1G05800 | Symbols: DGL | DGL (DONGLE); triacylglycerol lipase | chr1:1741204-1742619 FORWARD Lipase_3 Lipase_3 protein|lipase, putative, expressed	T
LOC_Os11g19840.1	16.2	secondary metabolism.phenylpropanoids	weakly similar to ( 150) AT4G35160 | Symbols: | O-methyltransferase family 2 protein | chr4:16730989-16732808 REVERSEmoderately similar to ( 211) 7OMT9_MEDSA Isoflavone-7-O-methyltransferase 9 (EC 2.1.1.150) (Isoflavone-O-methyltransferase 9) (7 IOMT-9) - Medicago sativa (Alfalfa) Methyltransf_2 protein|O-methyltransferase, putative, expressed	T
LOC_Os11g19850.1	35.2	not assigned.unknown	protein|expressed protein	T
LOC_Os11g22370.1	30.2.17	signalling.receptor kinases.DUF 26	moderately similar to ( 240) AT4G23160 | Symbols: | protein kinase family protein | chr4:12129485-12134086 FORWARDhighly similar to ( 625) POLX_TOBAC Retrovirus-related Pol polyprotein from transposon TNT 1-94 [Includes: Protease (EC 3.4.23.-); Reverse transcriptase (EC 2.7.7.49); Endonuclease] - Nicotiana tabacum (Common tobacco)RVT_2 rve protein|retrotransposon protein, putative, Ty1-copia subc…	T
LOC_Os11g26760.1	35.2	not assigned.unknown	very weakly similar to (94.4) DH16C_ORYSA Dehydrin Rab16C - Oryza sativa (Rice) protein|dehydrin, putative, expressed	T
LOC_Os11g26880.1	35.2	not assigned.unknown	protein|RALFL14 - Rapid ALkalinization Factor RALF family protein precursor, expressed	T
LOC_Os11g28540.1	35.2	not assigned.unknown	protein|expressed protein	T
LOC_Os11g28910.1	35.2	not assigned.unknown	protein|transposon protein, putative, CACTA, En/Spm sub-class, expressed	T
LOC_Os11g28920.1	35.2	not assigned.unknown	protein|expressed protein	T
LOC_Os11g29840.1	35.2	not assigned.unknown	protein|expressed protein	T
LOC_Os11g29920.1	20.1.7	stress.biotic.PR-proteins	moderately similar to ( 248) AT3G14470 | Symbols: | disease resistance protein (NBS-LRR class), putative | chr3:4857940-4861104 FORWARD NB-ARC protein|NB-ARC domain containing protein, expressed	T
LOC_Os11g31800.1	35.2	not assigned.unknown	protein|expressed protein	T
LOC_Os11g34060.1	35.2	not assigned.unknown	protein|retrotransposon, putative, centromere-specific, expressed	T
LOC_Os11g34624.1	30.2.24	signalling.receptor kinases.S-locus glycoprotein like	moderately similar to ( 359) AT4G21410 | Symbols: | protein kinase family protein | chr4:11402463-11405025 REVERSEweakly similar to ( 190) PSKR_DAUCA Phytosulfokine receptor precursor (EC 2.7.11.1) (Phytosulfokine LRR receptor kinase) - Daucus carota (Carrot) TyrKc PTKc Pkinase_Tyr S_TKc S_TKc Pkinase PTKc_Jak_rpt2 PTKc_Srm_Brk PTKc_Src_like PTKc_Csk_like PTKc_Trk PTKc_EGFR_like PTKc_Ror SPS1 PTK…	T
LOC_Os11g35080.1	35.2	not assigned.unknown	protein|expressed protein	T
LOC_Os11g35980.1	20.1.7	stress.biotic.PR-proteins	weakly similar to ( 150) AT2G34930 | Symbols: | disease resistance family protein | chr2:14737169-14739886 REVERSEweakly similar to ( 112) RPK1_IPONI Receptor-like protein kinase precursor (EC 2.7.11.1) - Ipomoea nil (Japanese morning glory) (Pharbitis nil) protein|leucine rich repeat protein, putative, expressed	T
LOC_Os11g37920.1	33.99	development.unspecified	moderately similar to ( 319) AT2G38860 | Symbols: YLS5 | YLS5 | chr2:16233629-16235207 REVERSE GATase1_PfpI_1 GATase1_PfpI_like protein|DJ-1 family protein, putative, expressed	T
LOC_Os11g38360.1	35.2	not assigned.unknown	DUF1263 protein|retrotransposon protein, putative, unclassified, expressed	T
LOC_Os11g39090.1	35.2	not assigned.unknown	protein|expressed protein	T
LOC_Os11g40009.1	33.1	development.storage proteins	moderately similar to ( 255) AT2G26560 | Symbols: PLP2, PLA IIA, PLA2A | PLA2A (PHOSPHOLIPASE A 2A); lipase/ nutrient reservoir | chr2:11293912-11295708 REVERSEweakly similar to ( 162) PAT5_SOLTU Patatin T5 precursor (Potato tuber protein) - Solanum tuberosum (Potato) Patatin COG3621 protein|phospholipase, patatin family, putative, expressed	T
LOC_Os11g40009.2	33.1	development.storage proteins	moderately similar to ( 255) AT2G26560 | Symbols: PLP2, PLA IIA, PLA2A | PLA2A (PHOSPHOLIPASE A 2A); lipase/ nutrient reservoir | chr2:11293912-11295708 REVERSEweakly similar to ( 162) PAT5_SOLTU Patatin T5 precursor (Potato tuber protein) - Solanum tuberosum (Potato) Patatin COG3621 protein|phospholipase, patatin family, putative, expressed	T
LOC_Os11g40340.1	35.2	not assigned.unknown	protein|expressed protein	T
LOC_Os11g40360.1	28.1.1.4	DNA.synthesis/chromatin structure.retrotransposon/transposase.hat-like transposase	moderately similar to ( 239) AT3G42170 | Symbols: | DNA binding | chr3:14321838-14323928 FORWARDmoderately similar to ( 245) TRA1_MAIZE Putative AC transposase (ORFA) - Zea mays (Maize) hATC protein|transposon protein, putative, unclassified, expressed	T
LOC_Os11g40850.1	35.2	not assigned.unknown	protein|expressed protein	T
LOC_Os11g40930.1	35.2	not assigned.unknown	protein|expressed protein	T
LOC_Os11g43790.1	35.2	not assigned.unknown	protein|DUF581 domain containing protein, expressed	T
LOC_Os11g43810.1	35.2	not assigned.unknown	protein|retrotransposon protein, putative, Ty3-gypsy subclass, expressed	T
LOC_Os11g44860.1	29.4.1.57	protein.postranslational modification.kinase.receptor like cytoplasmatic kinase VII	moderately similar to ( 247) AT4G21390 | Symbols: B120 | B120; ATP binding / protein kinase/ protein serine/threonine kinase/ sugar binding | chr4:11394458-11397474 REVERSEweakly similar to ( 171) NORK_MEDTR Nodulation receptor kinase precursor (EC 2.7.11.1) (Does not make infections protein 2) (Symbiosis receptor-like kinase) (MtSYMRK) - Medicago truncatula (Barrel medic) Pkinase_Tyr S_TKc Pkina…	T
LOC_Os11g45540.1	30.2.24	signalling.receptor kinases.S-locus glycoprotein like	moderately similar to ( 433) AT4G23270 | Symbols: | protein kinase family protein | chr4:12171133-12173794 FORWARDmoderately similar to ( 213) PSKR_DAUCA Phytosulfokine receptor precursor (EC 2.7.11.1) (Phytosulfokine LRR receptor kinase) - Daucus carota (Carrot) Pkinase_Tyr TyrKc PTKc S_TKc Pkinase S_TKc PTKc_Jak_rpt2 PTKc_Srm_Brk PTKc_Src_like PTKc_Jak2_Jak3_rpt2 PTKc_Frk_like PTKc_EGFR_like PT…	T
LOC_Os11g45600.1	35.2	not assigned.unknown	protein|rust resistance protein Rp1-dp8, putative, expressed	T
LOC_Os11g45620.1	20.1.7	stress.biotic.PR-proteins	weakly similar to ( 126) AT3G07040 | Symbols: RPM1, RPS3 | RPM1 (RESISTANCE TO P. SYRINGAE PV MACULICOLA 1); nucleotide binding / protein binding | chr3:2226244-2229024 REVERSE NB-ARC protein|rust-resistance protein Lr21, putative, expressed	T
LOC_Os11g45990.1	29.5.11.4.2	protein.degradation.ubiquitin.E3.RING	weakly similar to ( 161) AT2G38970 | Symbols: | zinc finger (C3HC4-type RING finger) family protein | chr2:16274135-16276651 FORWARDvWA_C3HC4_type vWA_interalpha_trypsin_inhibitor VWA vWA_subgroup protein|von Willebrand factor type A domain containing protein, putative, expressed	T
LOC_Os12g01490.1	27.3.20	RNA.regulation of transcription.G2-like transcription factor family, GARP	weakly similar to ( 124) AT2G38300 | Symbols: | DNA binding / transcription factor | chr2:16044175-16045679 REVERSE protein|MYB family transcription factor, putative, expressed	T
LOC_Os12g02550.1	35.2	not assigned.unknown	moderately similar to ( 227) AT3G08600 | Symbols: | unknown protein | chr3:2612646-2613596 FORWARDDUF1191 protein|expressed protein	T
LOC_Os12g02814.1	27.2	RNA.transcription	weakly similar to ( 113) RRPO_OENBE RNA-directed DNA polymerase homolog (Reverse transcriptase homolog) - Oenothera bertiana (Berteros evening primrose)RT_LTR RVT_1 RT_Rtv RT_ZFREV_like protein|retrotransposon protein, putative, unclassified, expressed	T
LOC_Os12g02980.1	23.2	nucleotide metabolism.degradation	moderately similar to ( 404) AT3G04080 | Symbols: ATAPY1 | ATAPY1 (APYRASE 1); ATPase/ calmodulin binding / nucleotide diphosphatase | chr3:1068068-1070917 REVERSEmoderately similar to ( 410) APY_SOLTU Apyrase precursor (EC 3.6.1.5) (ATP-diphosphatase) (Adenosine diphosphatase) (ADPase) (ATP-diphosphohydrolase) - Solanum tuberosum (Potato) GDA1_CD39 COG5371 protein|nucleoside-triphosphatase, puta…	T
LOC_Os12g02980.2	23.2	nucleotide metabolism.degradation	moderately similar to ( 311) AT5G18280 | Symbols: ATAPY2, APY2 | ATAPY2 (ARABIDOPSIS THALIANA APYRASE 2); ATPase/ nucleotide diphosphatase | chr5:6050799-6054875 REVERSEmoderately similar to ( 329) APY_SOLTU Apyrase precursor (EC 3.6.1.5) (ATP-diphosphatase) (Adenosine diphosphatase) (ADPase) (ATP-diphosphohydrolase) - Solanum tuberosum (Potato) GDA1_CD39 COG5371 protein|nucleoside-triphosphatase…	T
LOC_Os12g03050.1	33.99	development.unspecified	moderately similar to ( 219) AT5G18270 | Symbols: ANAC087 | ANAC087; transcription factor | chr5:6041241-6042743 REVERSEhighly similar to ( 637) NAC77_ORYSA NAC domain-containing protein 77 (ONAC077) (ONAC300) - Oryza sativa (Rice)NAM protein|no apical meristem protein, putative, expressed	T
LOC_Os12g03670.1	30.2.99	signalling.receptor kinases.misc	moderately similar to ( 329) AT1G34300 | Symbols: | lectin protein kinase family protein | chr1:12503450-12505939 FORWARDhighly similar to ( 768) KPRO_MAIZE Putative receptor protein kinase ZmPK1 precursor (EC 2.7.11.1) - Zea mays (Maize) Pkinase S_TKc S_TKc Pkinase_Tyr TyrKc PTKc SPS1 PTKc_Csk_like PTKc_Jak_rpt2 PTKc_EphR PTKc_EphR_A2 PTKc_Src_like PTKc_Trk PTKc_InsR_like PTKc_Srm_Brk PTKc_Itk P…	T
LOC_Os12g03730.1	27.3.99	RNA.regulation of transcription.unclassified	moderately similar to ( 424) AT3G56930 | Symbols: | zinc finger (DHHC type) family protein | chr3:21073805-21075873 FORWARD COG5273 zf-DHHC protein|zinc finger DHHC domain-containing protein, putative, expressed	T
LOC_Os12g04230.1	27.3.27	RNA.regulation of transcription.NAC domain transcription factor family	protein|expressed protein	T
LOC_Os12g04690.1	35.2	not assigned.unknown	protein|embryogenesis transmembrane protein, putative, expressed	T
LOC_Os12g05690.1	35.2	not assigned.unknown	protein|expressed protein	T
LOC_Os12g08050.1	29.4.1.57	protein.postranslational modification.kinase.receptor like cytoplasmatic kinase VII	moderately similar to ( 259) AT1G77280 | Symbols: | protein kinase family protein | chr1:29031468-29035882 REVERSEweakly similar to ( 145) NORK_MEDTR Nodulation receptor kinase precursor (EC 2.7.11.1) (Does not make infections protein 2) (Symbiosis receptor-like kinase) (MtSYMRK) - Medicago truncatula (Barrel medic) Pkinase S_TKc Pkinase_Tyr TyrKc S_TKc PTKc protein|nodulation receptor kinase pre…	T
LOC_Os12g08700.1	35.2	not assigned.unknown	protein|expressed protein	T
LOC_Os12g08930.1	35.2	not assigned.unknown	protein|expressed protein	T
LOC_Os12g16240.1	16.8.5.1	secondary metabolism.flavonoids.isoflavones.isoflavone reductase	moderately similar to ( 231) AT1G32100 | Symbols: ATPRR1, PRR1 | PRR1 (PINORESINOL REDUCTASE 1); pinoresinol reductase | chr1:11546472-11547953 REVERSEweakly similar to ( 157) IFRH_SOLTU Isoflavone reductase homolog (EC 1.3.1.-) (CP100) - Solanum tuberosum (Potato)NmrA protein|nmrA-like family domain containing protein, expressed	T
LOC_Os12g16250.1	16.8.5.1	secondary metabolism.flavonoids.isoflavones.isoflavone reductase	weakly similar to ( 151) AT4G13660 | Symbols: ATPRR2, PRR2 | PRR2 (PINORESINOL REDUCTASE 2); pinoresinol reductase | chr4:7946283-7948252 FORWARDvery weakly similar to (91.7) IFRH_MAIZE Isoflavone reductase homolog IRL (EC 1.3.1.-) - Zea mays (Maize)NmrA protein|nmrA-like family domain containing protein, expressed	T
LOC_Os12g18560.1	26.18	misc.invertase/pectin methylesterase inhibitor family protein	PMEI protein|invertase/pectin methylesterase inhibitor family protein, putative, expressed	T
LOC_Os12g18780.1	35.2	not assigned.unknown	protein|expressed protein	T
LOC_Os12g22970.1	35.2	not assigned.unknown	protein|expressed protein	T
LOC_Os12g25870.1	26.6	misc.O-methyl transferases	weakly similar to ( 138) ZRP4_MAIZE O-methyltransferase ZRP4 (EC 2.1.1.-) (OMT) - Zea mays (Maize) Methyltransf_2 protein|O-methyltransferase, putative, expressed	T
LOC_Os12g27470.1	35.2	not assigned.unknown	protein|expressed protein	T
LOC_Os12g29300.1	10.2.1	cell wall.cellulose synthesis.cellulose synthase	weakly similar to ( 185) AT3G03050 | Symbols: CSLD3, KJK, ATCSLD3 | CSLD3 (CELLULOSE SYNTHASE-LIKE D3); cellulose synthase/ transferase, transferring glycosyl groups | chr3:687873-691629 FORWARDCellulose_synt protein|CESA10 - cellulose synthase, expressed	T
LOC_Os12g30824.1	16.1.5	secondary metabolism.isoprenoids.terpenoids	highly similar to ( 563) AT1G79460 | Symbols: GA2, KS, ATKS | GA2 (GA REQUIRING 2); ent-kaurene synthase | chr1:29890568-29894436 FORWARDhighly similar to ( 617) KSB_CUCMA Ent-kaurene synthase B, chloroplast precursor (EC 4.2.3.19) (KSB) - Cucurbita maxima (Pumpkin) (Winter squash)Terpene_cyclase_plant_C1 Terpene_cyclase_C1 Terpene_synth_C Terpene_synth Isoprenoid_Biosyn_C1 protein|terpene syntha…	T
LOC_Os12g30824.2	16.1.5	secondary metabolism.isoprenoids.terpenoids	highly similar to ( 563) AT1G79460 | Symbols: GA2, KS, ATKS | GA2 (GA REQUIRING 2); ent-kaurene synthase | chr1:29890568-29894436 FORWARDhighly similar to ( 617) KSB_CUCMA Ent-kaurene synthase B, chloroplast precursor (EC 4.2.3.19) (KSB) - Cucurbita maxima (Pumpkin) (Winter squash)Terpene_cyclase_plant_C1 Terpene_cyclase_C1 Terpene_synth_C Terpene_synth Isoprenoid_Biosyn_C1 protein|terpene syntha…	T
LOC_Os12g31130.1	35.2	not assigned.unknown	very weakly similar to (90.5) AT3G24255 | Symbols: | unknown protein | chr3:8788949-8793208 FORWARDRT_nLTR_like RVT_1 protein|retrotransposon protein, putative, unclassified, expressed	T
LOC_Os12g31890.1	23.2.2	nucleotide metabolism.degradation.purine	moderately similar to ( 474) AT2G03530 | Symbols: UPS2, ATUPS2 | UPS2 (UREIDE PERMEASE 2) | chr2:1071951-1073522 FORWARDmoderately similar to ( 420) UPSA3_VIGUN Probable ureide permease A3 (VuA3) (Fragment) - Vigna unguiculata (Cowpea)FAE_3-kCoA_syn1 protein|ureide permease, putative, expressed	T
LOC_Os12g32390.1	35.2	not assigned.unknown	protein|expressed protein	T
LOC_Os12g34430.1	35.2	not assigned.unknown	protein|retrotransposon protein, putative, unclassified, expressed	T
LOC_Os12g34550.1	29.2.1.1.1.1.15	protein.synthesis.ribosomal protein.prokaryotic.chloroplast.30S subunit.S15	very weakly similar to (85.1) ATCG01120 | Symbols: RPS15 | encodes a chloroplast ribosomal protein S15, a constituent of the small subunit of the ribosomal complex | chrC:123296-123562 REVERSEweakly similar to ( 129) RR15_ORYSA Chloroplast 30S ribosomal protein S15 - Oryza sativa (Rice)rps15 Ribosomal_S15 Ribosomal_S15p_S13e rpsO protein|ribosomal protein S15 containing protein, expressed	T
LOC_Os12g35490.1	35.2	not assigned.unknown	protein|expressed protein	T
LOC_Os12g37070.1	35.2	not assigned.unknown	very weakly similar to (80.5) AT3G62580 | Symbols: | FUNCTIONS IN: molecular_function unknown; INVOLVED IN: biological_process unknown; LOCATED IN: endomembrane system; EXPRESSED IN: 23 plant structures; EXPRESSED DURING: 13 growth stages; BEST Arabidopsis thaliana protein match is: late embryogenesis abundant domain-containing protein / LEA domain-containing protein (TAIR:AT1G72100.1); Has 237 B…	T
LOC_Os12g37080.1	35.2	not assigned.unknown	protein|expressed protein	T
LOC_Os12g37320.1	17.7.1.2	hormone metabolism.jasmonate.synthesis-degradation.lipoxygenase	weakly similar to ( 156) AT3G45140 | Symbols: LOX2, ATLOX2 | LOX2 (LIPOXYGENASE 2); lipoxygenase | chr3:16525437-16529233 FORWARDmoderately similar to ( 251) LOX21_HORVU Lipoxygenase 2.1, chloroplast precursor (EC 1.13.11.12) (LOX-100) (LOX2:Hv:1) - Hordeum vulgare (Barley)Lipoxygenase protein|lipoxygenase 2.2, chloroplast precursor, putative, expressed	T
LOC_Os12g37320.2	17.7.1.2	hormone metabolism.jasmonate.synthesis-degradation.lipoxygenase	weakly similar to ( 146) AT3G45140 | Symbols: LOX2, ATLOX2 | LOX2 (LIPOXYGENASE 2); lipoxygenase | chr3:16525437-16529233 FORWARDmoderately similar to ( 232) LOX21_HORVU Lipoxygenase 2.1, chloroplast precursor (EC 1.13.11.12) (LOX-100) (LOX2:Hv:1) - Hordeum vulgare (Barley)Lipoxygenase protein|lipoxygenase 2.2, chloroplast precursor, putative, expressed	T
LOC_Os12g37330.1	35.2	not assigned.unknown	Transposase_28 protein|retrotransposon protein, putative, Ty3-gypsy subclass, expressed	T
LOC_Os12g37510.1	26.2	misc.UDP glucosyl and glucoronyl transferases	weakly similar to ( 144) AT5G49690 | Symbols: | UDP-glucoronosyl/UDP-glucosyl transferase family protein | chr5:20189968-20191350 REVERSEweakly similar to ( 108) UFOG_SOLME Anthocyanidin 3-O-glucosyltransferase (EC 2.4.1.115) (Flavonol 3-O-glucosyltransferase) (UDP-glucose flavonoid 3-O-glucosyltransferase) - Solanum melongena (Eggplant) (Aubergine) UDPGT protein|UDP-glucoronosyl and UDP-glucosyl…	T
LOC_Os12g39780.1	35.2	not assigned.unknown	protein|retrotransposon protein, putative, unclassified, expressed	T
LOC_Os12g40100.1	35.2	not assigned.unknown	protein|expressed protein	T
LOC_Os12g41570.1	30.2.25	signalling.receptor kinases.wall associated kinase	very weakly similar to (98.6) AT2G23450 | Symbols: | protein kinase family protein | chr2:9988926-9991244 REVERSE protein|expressed protein	T
LOC_Os12g44050.1	26.13	misc.acid and other phosphatases	very weakly similar to (85.9) AT2G16430 | Symbols: PAP10, ATPAP10 | PAP10 (PURPLE ACID PHOSPHATASE 10); acid phosphatase/ protein serine/threonine phosphatase | chr2:7120502-7122772 REVERSEvery weakly similar to (84.7) PPAF_SOYBN Purple acid phosphatase precursor (EC 3.1.3.2) (Manganese(II) purple acid phosphatase) - Glycine max (Soybean) protein|purple acid phosphatase precursor, putative, expre…	T

## Sheet: Table S4
Table S4. Summary of primers used in this study.
Name	Locus_id	Purpose	Primer	Sequence
CRPG15	LOC_Os04g01810	Expression	CRPG15_EP_F	GGGACAGTGGGAGAAAGACG
			CRPG15_EP_R	AAAGGGTTTCCATGAGCCGT
CRPG17	LOC_Os06g45890	Expression	CRPG17_EP_F	AGAGAGAGCGTCAGGCTAGT
			CRPG17_EP_R	CGTGCATGCGCTACTGAAAA
CRPG32	LOC_Os11g02520	Expression	CRPG32_EP_F	CGACACAGCCCATCACAGTA
			CRPG32_EP_R	TCGAACGTCCAATGCTCAGA
CRPG33	LOC_Os09g16030	Expression	CRPG33_EP_F	TGTGCGAGGTTTCCTCAGTC
			CRPG33_EP_R	AGAATCTCGCATTGAGCGGT
CRPG62	LOC_Os04g56170	Expression	CRPG62_EP_F	AGAGATTCTGCCAGCAGTGCA
			CRPG62_EP_R	GCCCTTCTCTTTTCACCAGA
		Genotyping	CRPG62_GT_F	ATGCGTGCATGTTTCTAGGT
			CRPG62_GT_R	ACTGTTCCATCCCAGAGACA
CRPG64	LOC_Os03g01870	Expression	CRPG64_EP_F	TCCAAGCTCCAACCTCGTTC
			CRPG64_EP_R	CAGTAATCGCTCGCGTCTTG
CRPG70	LOC_Os10g04400	Expression	CRPG70_EP_F	GAGTACATGCGGTCCATGCT
			CRPG70_EP_R	ATATAGGCTCGCCGCAATCA
CRPG135	LOC_Os10g38820	Expression	CRPG135_EP_F	TCCGCTGTCAGAACCAGATG
			CRPG135_EP_R	GCCCTGATGAGCACCTAGAC
CRPG160	LOC_Os03g41480	Expression	CRPG160_EP_F	ACTGATCAATGGCAGGGAGG
			CRPG160_EP_R	AGGTACACCGGAAAACGCTC
CRPG311	LOC_Os05g01256	Expression	CRPG311_EP_F	AGTTTGGACCGGGCATTGAT
			CRPG311_EP_R	CTGGCCTTGCTCTCCAACTT
CRPG348	LOC_Os04g15630	Expression	CRPG348_EP_F	GGGAAGTGCCAACAACTCCA
			CRPG348_EP_R	TATGGCGGGTGCTTCTTAGC
CRPG562	LOC_Os05g36900	Expression	CRPG562_EP_F	CATGCCAAGTACGAGCCGTT
			CRPG562_EP_R	GCAGAGAGCTGCTTCCAGTC
OsUbi5	LOC_Os01g22490	Expression	Ubi5_EP_F	GCACAAGCACAAGAAGGTGA
			Ubi5_EP_R	GCCTGCTGGTTGTAGACGTA
NGUS				AACGCTGATCAATTCCACAG

## Sheet: Table S5
Table S5. Motif scanning result for TFs among CRPGs.
Motif ID	Alt ID	Sequence Name	Strand	Start	End	p-value	q-value	Matched Sequence
1	DWWDDDGTACRNWNHW	LOC_Os10g38820	-	478	493	4.85e-05	0.458	ATAAAAGTACAAATTA
1	DWWDDDGTACRNWNHW	LOC_Os10g38820	-	656	671	9.41e-05	0.622	GAGGGAGTACGTACTT
1	DWWDDDGTACRNWNHW	LOC_Os09g33580	+	494	509	3.96e-05	0.458	AAAATGGTACATTGAA
1	DWWDDDGTACRNWNHW	LOC_Os08g43200	+	1593	1608	3.28e-05	0.458	TAAATGGTACGTTTTT
1	DWWDDDGTACRNWNHW	LOC_Os06g45890	+	1694	1709	6.06e-06	0.458	GATTTGGTACGTTTCT
1	DWWDDDGTACRNWNHW	LOC_Os05g36900	-	942	957	4.47e-05	0.458	TTTTAAGTACGAAAAA
1	DWWDDDGTACRNWNHW	LOC_Os05g01256	-	911	926	4.71e-05	0.458	ATTTTAGTACATTCAA
1	DWWDDDGTACRNWNHW	LOC_Os04g56170	-	923	938	2.52e-05	0.458	TTATTAGTACGAACCT
1	DWWDDDGTACRNWNHW	LOC_Os04g32790	+	1424	1439	4.47e-05	0.458	TTAGTAGTACATATTA
1	DWWDDDGTACRNWNHW	LOC_Os03g56140	-	1440	1455	8.8e-05	0.612	AAACTAGTACACTCCT
1	DWWDDDGTACRNWNHW	LOC_Os03g01870	+	1421	1436	8.24e-05	0.605	CATGTAGTACAGTACA
1	DWWDDDGTACRNWNHW	LOC_Os02g55380	-	800	815	8.24e-05	0.605	ATACGTGTACGTTGTT
1	DWWDDDGTACRNWNHW	LOC_Os02g45420	+	730	745	3.28e-05	0.458	GTATAGGTACAATTAT
1	DWWDDDGTACRNWNHW	LOC_Os02g43560	-	352	367	3.96e-05	0.458	TAAGTAGTACACATAT
1	DWWDDDGTACRNWNHW	LOC_Os02g43560	+	1302	1317	8.24e-05	0.605	GATTGCGTACACATAT
1	DWWDDDGTACRNWNHW	LOC_Os01g62514	-	1433	1448	6.41e-05	0.565	GAAACTGTACGCTGTT
1	DWWDDDGTACRNWNHW	LOC_Os01g60520	+	1438	1453	4.71e-05	0.458	ATATATGTACATACAT
1	DWWDDDGTACRNWNHW	LOC_Os01g60520	-	1512	1527	4.85e-05	0.458	ATATATGTACATATAT
1	DWWDDDGTACRNWNHW	LOC_Os01g60520	+	1512	1527	4.85e-05	0.458	ATATATGTACATATAT
1	DWWDDDGTACRNWNHW	LOC_Os01g43650	-	60	75	4.47e-05	0.458	TTAGTAGTACAATTTA
